# Supplementary material for: The oncoprotein BCL6 enables solid tumor cells to evade genotoxic stress
Source: eLife. 2022 May 3;11:e69255. doi: 10.7554/eLife.69255 (PMC9064299; doi:10.7554/eLife.69255)
Supplement: Figure 1—source data 1. [file elife-69255-fig1-data1.xlsx]

## Sheet: 1A
Figure 1A Source Data
	Cell lines	H661	Capan-2	H838	DLD-1	AsPC-1	OVCA420	PANC28	HCC827	OVCAR8	HCT116	HT-29	PC9	H1975	HCT-8	ES-2	LoVo	BxPC-3	PANC-1	MIA PaCa-2	HEY	HEYA8	H522
ETO IC50 (μM)	Exp #1	241.6	168	77.76	62.11	71.04	75.59	64.07	53.45	41.56	18.61	35.43	29.51	22.05	28.58	6.294	5.414	0.82	3.115	2.979	1.666	0.5558	0.4349
	Exp #2	195.7	314.4	71.72	57.39	113.8	68.73	95.6	65.2	59.97	51.84	42.88	19.57	31.42	17.39	9.222	4.818	7.653	3.716	2.805	1.542	0.7409	0.842
	Exp #3	214.3	154.6	119.9	136.3	57.14	56.8	26.34	25.73	42.43	62.37	19.14	31.1	22.14	23.68	9.085	5.931	4.015	2.108	3.114	1.536	0.7574	0.6323
	Mean	217.2	212.333	89.7933	85.2667	80.66	67.04	62.0033	48.1267	47.9867	44.2733	32.4833	26.7267	25.2033	23.2167	8.20033	5.38767	4.16267	2.97967	2.966	1.58133	0.6847	0.6364
	STDEV	18.8505	72.3791	21.431	36.1374	24.1108	7.76351	28.313	16.5474	8.48094	18.649	9.91326	5.10199	4.396	4.58003	1.34914	0.454762	2.79151	0.663402	0.126483	0.0599185	0.0913946	0.166223

## Sheet: 1B
Figure 1B Source Data
Capan-2
Gene	External Database	Capan-2-ETO vs Capan-2-Ctrl (moderated t-test)			Normalized Log2 CPM								Expression Z Scores
Probe Set ID	GeneSymbol	Fold Change	P-value	FDR	Capan-2-Ctrl-1	Capan-2-Ctrl-2	Capan-2-Ctrl-3	Capan-2-ETO-1	Capan-2-ETO-2	Capan-2-ETO-3	Mean	STDEV	Capan-2-Ctrl-1	Capan-2-Ctrl-2	Capan-2-Ctrl-3	Capan-2-ETO-1	Capan-2-ETO-2	Capan-2-ETO-3
ATR	ATR	-1.23493	0.000283031	0.00147845	10.8029	10.6819	10.7567	10.4667	10.4394	10.4222	10.595	0.171738	1.21053	0.506404	0.941982	-0.746882	-0.90575	-1.00629
BAG1	BAG1	-1.5556	1.30411e-05	0.00016576	13.9534	13.9846	13.9943	13.2983	13.2916	13.4299	13.6587	0.352886	0.835192	0.923529	0.95097	-1.02134	-1.04014	-0.648213
CDKN1B	CDKN1B	-1.18847	0.000209583	0.00117866	10.7786	10.7235	10.7172	10.5221	10.4894	10.4605	10.6152	0.139472	1.17143	0.776461	0.731263	-0.667982	-0.901895	-1.10928
CHEK1	CHEK1	-1.10803	0.0088004	0.0218154	13.6449	13.5616	13.5286	13.4025	13.4718	13.4168	13.5044	0.092427	1.52032	0.619097	0.262358	-1.10244	-0.352191	-0.947145
CXCR4	CXCR4	-1.11763	0.0508558	0.0919221	9.06592	8.9819	9.15784	8.95459	8.81978	8.94995	8.98833	0.114729	0.676275	-0.0560477	1.47745	-0.294073	-1.46911	-0.334488
DOCK9	DOCK9	-1.37607	5.48147e-05	0.000446682	11.8493	11.9292	11.9413	11.4048	11.4232	11.5102	11.6763	0.256711	0.673825	0.985091	1.03216	-1.0578	-0.986143	-0.647133
EIF4E	EIF4E	-1.53955	0.000191178	0.00109801	11.6355	11.7426	11.741	11.128	11.1757	10.9479	11.3951	0.351475	0.683804	0.988727	0.984166	-0.760028	-0.624353	-1.27232
EP300	EP300	-1.25625	0.00564713	0.0152025	10.5176	10.6324	10.7327	10.2119	10.4012	10.2823	10.463	0.201965	0.270358	0.838676	1.33537	-1.24318	-0.306195	-0.895025
ERG	ERG	-1.63844	0.000125709	0.000806953	9.67782	9.61142	9.70307	9.04038	9.01084	8.80412	9.30794	0.399683	0.925434	0.759289	0.988608	-0.669427	-0.743343	-1.26056
MYC	MYC	-1.53081	1.92647e-06	4.76743e-05	13.4	13.4141	13.4658	12.7781	12.8532	12.8057	13.1195	0.338028	0.82996	0.871498	1.02447	-1.00994	-0.787807	-0.928177
NOTCH2	NOTCH2	-1.49083	1.97382e-06	4.84799e-05	12.9031	12.9571	12.9305	12.3657	12.3107	12.386	12.6422	0.316975	0.823233	0.993596	0.909501	-0.872212	-1.04587	-0.808248
PIM1	PIM1	-1.17621	0.00455798	0.0128483	10.423	10.4321	10.5208	10.198	10.3111	10.1643	10.3416	0.141351	0.575852	0.640736	1.26816	-1.01552	-0.215463	-1.25376
RB1	RB1	-1.78243	2.41731e-06	5.49916e-05	11.5984	11.7175	11.6375	10.8107	10.7779	10.8633	11.2342	0.459138	0.793198	1.05261	0.878364	-0.922456	-0.993877	-0.807841
XBP1	XBP1	-1.28646	1.87978e-05	0.00020854	12.8655	12.9161	12.9253	12.513	12.5287	12.575	12.7206	0.201121	0.720592	0.971998	1.01779	-1.03229	-0.954027	-0.724073
BRAF	BRAF	-1.35986	2.22067e-05	0.000235246	11.11	11.0492	11.1263	10.6209	10.6378	10.6965	10.8734	0.245536	0.963557	0.71565	1.02989	-1.02868	-0.959895	-0.720525
SYK	SYK	10.5159	9.03562e-05	0.000637063	0.127549	0.127549	0.127549	4.20652	3.36676	2.99288	1.8248	1.90035	-0.893127	-0.893127	-0.893127	1.25331	0.811408	0.614666
MERTK	MERTK	2.50391	0.00506341	0.0139607	4.75898	5.20249	4.36261	5.8052	6.48041	6.01102	5.43679	0.802845	-0.844251	-0.291831	-1.33796	0.458883	1.29991	0.715254
BANK1	BANK1	12.8475	0.000199614	0.00113551	0.127549	0.127549	0.127549	4.7336	3.36676	3.33255	1.96926	2.07985	-0.885502	-0.885502	-0.885502	1.32911	0.671924	0.655476
HSF1	HSF1	1.07584	0.0132222	0.0303747	12.6597	12.6001	12.6849	12.7329	12.7398	12.7884	12.7009	0.0667873	-0.617707	-1.51012	-0.240834	0.478199	0.581652	1.30881
BCL6	BCL6	1.72898	2.88649e-05	0.000283117	9.9139	10.1409	9.98957	10.8146	10.8075	10.792	10.4097	0.438849	-1.12987	-0.612675	-0.957439	0.922596	0.906247	0.871136
H661
Gene	External Database	H661-ETO vs H661-Ctrl (moderated t-test)			Normalized Log2 CPM								Expression Z Scores
Probe Set ID	GeneSymbol	Fold Change	P-value	FDR	H661-Ctrl-1	H661-Ctrl-2	H661-Ctrl-3	H661-ETO-1	H661-ETO-2	H661-ETO-3	mean	stdev	H661-Ctrl-1	H661-Ctrl-2	H661-Ctrl-3	H661-ETO-1	H661-ETO-2	H661-ETO-3
CDKN2C	CDKN2C	-1.14816	0.000817874	0.00337013	11.0746	11.062	11.007	10.8071	10.8635	10.8751	10.9482	0.113855	1.11028	0.999074	0.516621	-1.23903	-0.744518	-0.642429
DOCK9	DOCK9	-1.18154	8.53258e-05	0.000610989	11.6328	11.6125	11.6374	11.4219	11.3836	11.3552	11.5072	0.133773	0.938832	0.786891	0.972873	-0.637695	-0.924146	-1.13676
EIF4E	EIF4E	-1.7917	3.31608e-07	1.93551e-05	12.0222	11.9559	12.0331	11.1936	11.1286	11.1651	11.5831	0.462032	0.950496	0.806848	0.974047	-0.842975	-0.983694	-0.904724
EP300	EP300	-1.35923	8.70959e-06	0.000126666	11.4369	11.4804	11.5239	11.0528	11.014	11.046	11.259	0.244436	0.727642	0.905906	1.08368	-0.843529	-1.00235	-0.871355
NOTCH2	NOTCH2	-1.62457	9.17898e-07	3.17066e-05	13.4244	13.4553	13.4963	12.7347	12.7343	12.8068	13.1086	0.38502	0.820101	0.900416	1.00683	-0.971223	-0.972174	-0.783951
PIM1	PIM1	-1.10195	0.0079199	0.0201766	10.2586	10.2328	10.2631	10.0682	10.0932	10.173	10.1815	0.0847948	0.909358	0.605401	0.962938	-1.33607	-1.04122	-0.100406
RB1	RB1	-1.41309	0.000121258	0.000786783	11.6944	11.5997	11.5707	11.201	11.0403	11.1269	11.3722	0.28092	1.14694	0.809924	0.706812	-0.609229	-1.18124	-0.873208
RHOH	RHOH	-1.41218	0.00351065	0.010485	11.3005	11.1698	11.437	10.6653	10.7692	10.9791	11.0535	0.302903	0.815573	0.383921	1.26627	-1.28167	-0.938674	-0.245418
ZEB2	ZEB2	-3.48326	9.32718e-09	3.97727e-06	14.9126	14.8877	14.8348	13.1363	13.0488	13.0487	13.9782	0.986979	0.946785	0.921574	0.867928	-0.852961	-0.9416	-0.941726
BRAF	BRAF	-1.34334	4.24498e-05	0.000372941	11.8525	11.8196	11.7755	11.4552	11.3499	11.365	11.603	0.237256	1.05173	0.913046	0.727405	-0.622747	-1.06645	-1.00298
BANK1	BANK1	1.35234	0.0241944	0.0501077	5.39935	5.29773	5.06463	5.64324	5.59222	5.83263	5.47163	0.274018	-0.263805	-0.634625	-1.48533	0.626274	0.440071	1.31741
BLK	BLK	6.81178	0.000821155	0.0033794	0.127549	0.127549	0.127549	3.77526	2.09287	2.81861	1.51156	1.6073	-0.86108	-0.86108	-0.86108	1.40838	0.361668	0.81319
HSF1	HSF1	1.2643	0.000123423	0.000796096	12.7647	12.8477	12.7667	13.089	13.1206	13.1844	12.9622	0.190225	-1.03825	-0.601807	-1.02793	0.666766	0.83295	1.16827
BCL6	BCL6	2.43786	9.49123e-06	0.000134754	7.78493	8.04705	7.96168	9.19777	9.13882	9.31392	8.57403	0.711454	-1.10914	-0.740705	-0.860699	0.876711	0.793857	1.03997
PC9
Gene	External Database	PC9-ETO vs PC9-Ctrl (moderated t-test)			Normalized Log2 CPM								Expression Z Scores
Probe Set ID	GeneSymbol	Fold Change	P-value	FDR	PC9-Ctrl-1	PC9-Ctrl-2	PC9-Ctrl-3	PC9-ETO-1	PC9-ETO-2	PC9-ETO-3	Mean	STDEV	PC9-Ctrl-1	PC9-Ctrl-2	PC9-Ctrl-3	PC9-ETO-1	PC9-ETO-2	PC9-ETO-3
DUSP5	DUSP5	-1.04692	0.0462208	0.191018	9.84831	9.78572	9.78357	9.74151	9.72241	9.75523	9.77279	0.0442976	1.70475	0.291941	0.243329	-0.70622	-1.13729	-0.396507
NOTCH2	NOTCH2	1.03682	0.0388284	0.172208	12.9399	12.892	12.9233	12.9925	12.9556	12.9636	12.9445	0.0346787	-0.134041	-1.51255	-0.609934	1.38376	0.321144	0.551624
PIM1	PIM1	-1.13818	0.0373859	0.168606	10.0799	10.0934	9.88055	9.83322	9.85837	9.80205	9.92458	0.128295	1.21049	1.31585	-0.34316	-0.712067	-0.516055	-0.955059
EP300	EP300	-1.08395	0.0368824	0.167304	10.9943	11.0159	10.9846	10.8633	10.8197	10.9629	10.9401	0.0794775	0.682252	0.953281	0.559511	-0.965996	-1.51572	0.286671
MCL1	MCL1	1.04907	0.0200956	0.118268	13.1637	13.1466	13.1245	13.2469	13.1977	13.1975	13.1795	0.0437261	-0.361133	-0.751993	-1.25786	1.54222	0.416749	0.412016
DOCK9	DOCK9	-1.11709	0.0193941	0.115758	12.5725	12.5572	12.7086	12.4789	12.4481	12.432	12.5329	0.103238	0.384073	0.235403	1.70149	-0.52305	-0.821028	-0.976894
BAG1	BAG1	-1.19796	0.0137362	0.0958768	11.6021	11.6525	11.5075	11.255	11.2755	11.4498	11.4571	0.164683	0.880507	1.18676	0.306163	-1.22704	-1.10226	-0.0441273
AXL	AXL	1.15556	0.00973282	0.0790161	12.1943	12.2808	12.1247	12.3962	12.3627	12.4666	12.3042	0.128935	-0.852526	-0.181669	-1.39245	0.713481	0.453619	1.25954
PRDM1	PRDM1	1.34449	0.00711939	0.066939	7.74878	7.85837	7.85551	8.72714	8.55266	8.03957	8.13034	0.409353	-0.932104	-0.664385	-0.671374	1.45791	1.03168	-0.221729
SYK	SYK	1.09329	0.00383337	0.0478843	11.614	11.5781	11.557	11.6734	11.7329	11.7288	11.6474	0.0757602	-0.440788	-0.914162	-1.1927	0.344204	1.12842	1.07503
CDKN1B	CDKN1B	-1.28918	0.000375562	0.0157182	10.7529	10.8131	10.7963	10.3969	10.5	10.366	10.6042	0.206494	0.720072	1.01155	0.93033	-1.00376	-0.504755	-1.15344
BCL6	BCL6	-1.29784	0.000217214	0.0127149	11.1559	11.1566	11.0777	10.763	10.8019	10.697	10.942	0.21068	1.01528	1.01845	0.644122	-0.849563	-0.665139	-1.16315
CDKN1A	CDKN1A	2.13854	0.000168962	0.0116619	11.5823	11.8879	11.5168	12.774	12.7462	12.7567	12.2106	0.613635	-1.02394	-0.525941	-1.13076	0.918003	0.872816	0.88982
GADD45A	GADD45A	1.49914	9.79029e-05	0.00906622	12.2107	12.2915	12.1939	12.7283	12.8487	12.8715	12.5241	0.325304	-0.963453	-0.7149	-1.01512	0.627642	0.99799	1.06784
NCOR1	NCOR1	-1.21816	1.70606e-05	0.00406193	13.2132	13.2384	13.2508	12.942	12.9353	12.9711	13.0918	0.156868	0.774093	0.934719	1.01355	-0.954951	-0.997751	-0.769655
TNFAIP3	TNFAIP3	1.94321	5.29799e-08	0.00055721	12.4344	12.4338	12.402	13.3762	13.365	13.4044	12.9026	0.52525	-0.891403	-0.892543	-0.953163	0.901582	0.880239	0.955288

## Sheet: S1A
Figure S1A Source Data
	Cell lines	DLD-1	H838	AsPC-1	Capan-2	OVCA420	OVCAR8	HCC827	HCT-8	H661	H522	MIA PaCa-2	H1975	HCT116	ES-2	PANC28	BxPC-3	HT-29	LoVo	HEY	PC9	PANC-1	HEYA8
ADR IC50 (μM)	Exp #1	2.928	2.5	1.573	2.213	1.87	1.708	0.522	0.9728	0.9561	0.1785	0.3216	0.4496	0.1395	0.2704	0.4118	0.1277	0.2541	0.1898	0.128	0.03215	0.02469	0.0131
	Exp #2	4.051	3.349	3.133	2.814	2.005	1.792	1.145	0.8851	0.7647	1.183	0.2761	0.4017	0.4647	0.3373	0.1264	0.2957	0.1979	0.1494	0.07824	0.1139	0.01875	0.01022
	Exp #3	4.069	2.067	2.941	1.428	1.573	1.102	1.121	0.503	0.5044	0.8013	1.331	1.028	0.3652	0.1985	0.1264	0.2018	0.1373	0.1956	0.08061	0.0457	0.02041	0.008039
	Mean	3.68267	2.63867	2.549	2.15167	1.816	1.534	0.929333	0.786967	0.741733	0.720933	0.6429	0.626433	0.323133	0.268733	0.221533	0.2084	0.196433	0.178267	0.0956167	0.0639167	0.0212833	0.010453
	STDEV	0.533681	0.53248	0.694573	0.567492	0.180449	0.307389	0.288195	0.203962	0.185119	0.414004	0.486915	0.284623	0.136054	0.0566771	0.134539	0.0687443	0.0476947	0.0205487	0.0229189	0.0357738	0.00250239	0.0020727
