# Supplementary material for: The oncoprotein BCL6 enables solid tumor cells to evade genotoxic stress
Source: eLife. 2022 May 3;11:e69255. doi: 10.7554/eLife.69255 (PMC9064299; doi:10.7554/eLife.69255)
Supplement: Figure 2—source data 1. [file elife-69255-fig2-data1.xlsx]

## Sheet: 2A
Figure 2A Source Data
Qutification of BCL6 and GAPDH protein levels
Cell lines	Control						ETO IC50 24 h
	BCL6			GAPDH			BCL6			GAPDH
	Exp #1	Exp #2	Exp #3	Exp #1	Exp #2	Exp #3	Exp #1	Exp #2	Exp #3	Exp #1	Exp #2	Exp #3
PANC28	47296	45720	47861	148673	148673	148673	144743	148760	150417	172992	178223	176230
AsPC-1	104167	101528	101528	143746	143746	139682	97479	95728	97479	144825	144825	140544
Capan-2	49164	47177	47177	147822	144444	144444	245233	256409	252845	162013	162013	164821
PANC-1	159019	159019	104217	109994	109994	108897	129831	126652	123500	104327	102391	100719
BxPC-3	61458	62296	62296	184595	182771	182771	89189	89189	92707	157240	157240	157240
PC9	114280	119271	111454	179425	182810	184886	84474	82658	84474	181149	181149	178730
H1975	89471	91300	91300	84196	90708	93241	145690	145690	151070	103628	99617	105057
H838	141404	143564	137705	123197	135018	129944	165005	153920	161292	134851	142742	148433
H661	13603	16881	15762	128097	129239	130457	49721	50398	56351	107137	107137	107137
H522	96743	98288	99934	205147	202928	200707	74394	74394	75854	171847	173782	178340
LoVo	62924	61359	63291	135672	135672	137539	70440	70440	68212	108408	110863	109227
HCT-8	70846	74057	72418	157573	158515	153784	92523	91713	93044	142657	147392	143738
HCT116	60479	58054	60479	191825	196607	193060	72708	70357	72708	136469	139820	140865
HT-29	39772	39772	39371	209014	209014	211803	92233	90678	92960	164494	164494	167624
DLD-1	56700	55046	55046	147394	147394	147394	154407	151876	153479	153195	153195	150373
HEYA8	90276	89446	92592	152571	151446	153681	86403	86403	84793	119003	119003	127859
OVCAR8	58024	56671	55893	92253	94084	92191	73700	70660	74456	84496	82897	81412
ES-2	127328	129299	131055	147405	145356	147405	41253	41253	43149	151021	154991	159026
OVCA420	40801	42946	43127	123991	123991	118376	83935	83935	84649	132993	138253	138893
HEY	114511	113450	115526	86935	84685	82122	65931	68218	68335	73850	76990	75940
Qutification of BCL6 and GAPDH mean protein expression levels
Cell lines	Control BCL6			Control GAPDH			ETO Control			ETO GAPDH
PANC28	46959			148673			147973			175815
AsPC-1	102408			142391			96895.3			143398
Capan-2	47839.3			145570			251496			162949
PANC-1	140752			109628			126661			102479
BxPC-3	62016.7			183379			90361.7			157240
PC9	115002			182374			83868.7			180343
H1975	90690.3			89381.7			147483			102767
H838	140891			129386			160072			142009
H661	15415.3			129264			52156.7			107137
H522	98321.7			202927			74880.7			174656
LoVo	62524.7			136294			69697.3			109499
HCT-8	72440.3			156624			92426.7			144596
HCT116	59670.7			193831			71924.3			139051
HT-29	39638.3			209944			91957			165537
DLD-1	55597.3			147394			153254			152254
HEYA8	90771.3			152566			85866.3			121955
OVCAR8	56862.7			92842.7			72938.7			82935
ES-2	129227			146722			41885			155013
OVCA420	42291.3			122119			84173			136713
HEY	114496			84580.7			67494.7			75593.3
Relative BCL6 protein levels								relative BCL6 protein levels compared with that of the control group
Cell lines	Control						ETO	ETO/Control	Mean of ETO IC50
PANC28	0.315854						0.841642	2.66465	62.0033
AsPC-1	0.719199						0.675709	0.93953	80.66
Capan-2	0.328635						1.5434	4.69641	212.333
PANC-1	1.2839						1.23597	0.96267	2.97967
BxPC-3	0.338188						0.574674	1.69927	4.16267
PC9	0.630583						0.465052	0.737495	26.7267
H1975	1.01464						1.43512	1.41441	25.2033
H838	1.08892						1.1272	1.03516	89.7933
H661	0.119254						0.486822	4.08222	217.2
H522	0.484517						0.428731	0.884864	0.6364
LoVo	0.458747						0.636509	1.38749	5.38767
HCT-8	0.462511						0.639208	1.38204	23.2167
HCT116	0.307849						0.51725	1.68021	44.2733
HT-29	0.188805						0.555506	2.94223	32.4833
DLD-1	0.377202						1.00657	2.6685	85.2667
HEYA8	0.594964						0.704082	1.1834	0.6847
OVCAR8	0.612463						0.879468	1.43595	47.9867
ES-2	0.880763						0.270204	0.306784	8.20033
OVCA420	0.346312						0.615691	1.77785	67.04
HEY	1.35369						0.892865	0.659581	1.58133

## Sheet: 2E
Figure 2E Source Data
Raw data	siNC	ETO	siBCL6 #1	siBCL6 #1+ETO	siBCL6 #2	siBCL6 #2+ETO
Exp #1	0.551	0.324	0.407	0.203	0.321	0.18
Exp #2	0.554	0.327	0.411	0.201	0.316	0.177
Exp #3	0.558	0.324	0.409	0.205	0.32	0.18
Mean of siNC	0.554333
Relative cell viability	siNC	ETO	siBCL6 #1	siBCL6 #1+ETO	siBCL6 #2	siBCL6 #2+ETO
Exp #1	99.3987	58.4486	73.4215	36.6206	57.9074	32.4714
Exp #2	99.9399	58.9898	74.1431	36.2598	57.0054	31.9302
Exp #3	100.661	58.4486	73.7823	36.9814	57.727	32.4714

## Sheet: 2F
Figure 2F Source Data
Raw data	siNC	ETO	siBCL6 #1	siBCL6 #1+ETO	siBCL6 #2	siBCL6 #2+ETO
Exp #1	3.446	1.953	2.07	0.661	1.922	0.63
Exp #2	3.5	1.822	2.056	0.663	1.933	0.633
Exp #3	3.286	1.935	2.034	0.66	1.999	0.644
Mean of siNC	3.41067
Relative cell viability	siNC	ETO	siBCL6 #1	siBCL6 #1+ETO	siBCL6 #2	siBCL6 #2+ETO
Exp #1	101.036	57.2615	60.6919	19.3804	56.3526	18.4715
Exp #2	102.619	53.4206	60.2815	19.439	56.6751	18.5594
Exp #3	96.3448	56.7338	59.6364	19.3511	58.6102	18.8819

## Sheet: 2G
Figure 2G Source Data
Raw data	siNC	NC+Dox	ETO 0.2 μM	ETO 0.2 μM+Dox	ETO 0.4 μM	ETO 0.4 μM+Dox
Exp #1	2.489	0.979	1.92	0.335	1.101	0.165
Exp #2	2.499	0.989	1.936	0.341	1.119	0.167
Exp #3	2.498	0.99	1.941	0.338	1.11	0.165
Mean of siNC	2.49533
Relative cell viability	siNC	NC+Dox	ETO 0.2 μM	ETO 0.2 μM+Dox	ETO 0.4 μM	ETO 0.4 μM+Dox
Exp #1	99.7462	39.2332	76.9436	13.4251	44.1224	6.61234
Exp #2	100.147	39.634	77.5848	13.6655	44.8437	6.69249
Exp #3	100.107	39.6741	77.7852	13.5453	44.483	6.61234

## Sheet: 2H
Figure 2H Source Data
Raw data
ETO	ETO dose (μM)	0	0.013122	0.04374	0.1458	0.486	1.62	5.4	18	60	200
H522 BCL6OE	Exp #1	1.011	1.042	1.041	0.945	0.822	0.768	0.616	0.719	0.509	0.405
	Exp #2	1.03	0.966	0.966	0.836	0.856	0.716	0.649	0.616	0.458	0.417
H522	Exp #1	1.659	1.511	1.484	1.223	0.951	0.788	0.702	0.565	0.405	0.319
	Exp #2	1.536	1.55	1.51	1.175	0.918	0.812	0.713	0.609	0.394	0.248
Relative cell viability	H522 BCL6OE Mean of 0 ETO	1.0205
	H522 Mean of 0 ETO	1.5975
ETO	ETO dose (μM)	0	0.013122	0.04374	0.1458	0.486	1.62	5.4	18	60	200
H522 BCL6OE	Exp #1	99.0691	102.107	102.009	92.6017	80.5488	75.2572	60.3626	70.4557	49.8775	39.6864
	Exp #2	100.931	94.6595	94.6595	81.9206	83.8805	70.1617	63.5963	60.3626	44.88	40.8623
H522	Exp #1	103.85	94.5853	92.8951	76.5571	59.5305	49.3271	43.9437	35.3678	25.3521	19.9687
	Exp #2	96.1502	97.0266	94.5227	73.5524	57.4648	50.8294	44.6322	38.1221	24.6635	15.5243

## Sheet: S2B
Figure S2B Source Data
Qutification of BCL6 and GAPDH protein expression levels
Cell lines	Control						ADR IC50 24 h
	BCL6			GAPDH			BCL6			GAPDH
	1	2	3	1	2	3	1	2	3	1	2	3
AsPC-1	71114	71114	73172	102360	104948	102985	138812	138812	136480	113980	113980	116150
Capan-2	38332	32939	37044	170176	167124	170176	114593	114698	114698	148677	150866	148677
PANC-1	107333	107333	100302	90823	88971	87432	109182	112172	109182	78253	78253	76905
BxPC-3	74243	72914	74243	136998	133770	136051	66634	64609	64609	125750	124154	124154
H1975	45848	45848	45848	106888	102014	98731	129604	129604	130964	114064	119781	123603
H838	103734	100976	97836	190296	190570	192440	141214	141214	143433	185728	181792	190375
H661	20325	20586	22818	162093	160803	161058	35451	38949	38949	175241	175241	176726
H522	96732	95460	92241	123530	129794	126187	189473	184005	185376	136041	134850	133720
LoVo	84032	85831	85831	168765	165642	165431	73114	77114	78313	167286	167286	165768
HCT-8	64219	64578	61746	136665	139989	135727	100493	99486	102049	176136	176136	176136
HCT116	48165	48165	49129	152506	152581	152581	30902	34289	31779	167643	167643	165525
HT-29	118509	118509	118428	58908	57552	57552	21155	22195	22195	87726	85381	86770
ES-2	143339	140296	138310	187512	181077	181061	44503	44331	44694	141361	143609	143682
OVCA420	61504	59316	58432	58426	92395	92395	126999	119564	118823	117387	108426	114830
Qutification of BCL6 and GAPDH mean protein expression levels
Cell lines	Control BCL6			Control GAPDH			ADR Control			ADR GAPDH
AsPC-1	71800			103431			138035			114703
Capan-2	36105			169159			114663			149407
PANC-1	104989			89075.3			110179			77803.7
BxPC-3	73800			135606			65284			124686
H1975	45848			102544			130057			119149
H838	100849			191102			141954			185965
H661	21243			161318			37783			175736
H522	94811			126504			186285			134870
LoVo	85231.3			166613			76180.3			166780
HCT-8	63514.3			137460			100676			176136
HCT116	48486.3			152556			32323.3			166937
HT-29	118482			58004			21848.3			86625.7
ES-2	140648			183217			44509.3			142884
OVCA420	59750.7			81072			121795			113548
Relative BCL6 protein levels								relative BCL6 protein levels compared with that of the control group
Cell lines	Control						ADR	ADR/Control	Mean ADR IC50
AsPC-1	0.694183						1.20341	1.73356	2.549
Capan-2	0.213439						0.767456	3.59567	2.15167
PANC-1	1.17866						1.41611	1.20146	0.0212833
BxPC-3	0.544222						0.523587	0.962083	0.2084
H1975	0.447104						1.09155	2.44138	0.626433
H838	0.527722						0.763335	1.44647	2.63867
H661	0.131684						0.214999	1.63269	0.741733
H522	0.749472						1.38121	1.84291	0.720933
LoVo	0.511554						0.456771	0.89291	0.178267
HCT-8	0.462056						0.571581	1.23704	0.786967
HCT116	0.317826						0.193626	0.609219	0.323133
HT-29	2.04265						0.252215	0.123475	0.196433
ES-2	0.767661						0.311507	0.405787	0.268733
OVCA420	0.737007						1.07264	1.45539	1.816
