# Supplementary material for: The oncoprotein BCL6 enables solid tumor cells to evade genotoxic stress
Source: eLife. 2022 May 3;11:e69255. doi: 10.7554/eLife.69255 (PMC9064299; doi:10.7554/eLife.69255)
Supplement: Figure 3—source data 1. [file elife-69255-fig3-data1.xlsx]

## Sheet: 3A
Figure 3A Source Data
follow link to MSigDB		GS DETAILS	SIZE	ES	NES	NOM p-val	FDR q-val	FWER p-val	RANK AT MAX	LEADING EDGE
1	HALLMARK_INTERFERON_ALPHA_RESPONSE	Details ...	96	0.61	2.13	0	0	0	6445	tags=48%, list=18%, signal=58%
2	HALLMARK_INFLAMMATORY_RESPONSE	Details ...	193	0.56	2.02	0	0	0	7351	tags=49%, list=20%, signal=61%
3	HALLMARK_ALLOGRAFT_REJECTION	Details ...	183	0.54	1.98	0	0	0	6089	tags=43%, list=17%, signal=52%
4	HALLMARK_INTERFERON_GAMMA_RESPONSE	Details ...	194	0.53	1.91	0	0	0	7422	tags=46%, list=21%, signal=58%
5	HALLMARK_KRAS_SIGNALING_DN	Details ...	179	0.53	1.89	0	0	0	7501	tags=45%, list=21%, signal=57%
6	HALLMARK_IL6_JAK_STAT3_SIGNALING	Details ...	82	0.52	1.79	0	0	0	5017	tags=35%, list=14%, signal=41%
7	HALLMARK_TNFA_SIGNALING_VIA_NFKB	Details ...	195	0.47	1.73	0	0	0	7298	tags=40%, list=20%, signal=50%
8	HALLMARK_KRAS_SIGNALING_UP	Details ...	191	0.48	1.72	0	0	0	6085	tags=38%, list=17%, signal=45%
9	HALLMARK_COAGULATION	Details ...	131	0.47	1.66	0	0.002	0.03	5373	tags=36%, list=15%, signal=42%
10	HALLMARK_PANCREAS_BETA_CELLS	Details ...	36	0.55	1.65	0	0.002	0.03	5418	tags=44%, list=15%, signal=52%
11	HALLMARK_APICAL_JUNCTION	Details ...	197	0.43	1.57	0	0.006	0.1	5232	tags=30%, list=14%, signal=35%
12	HALLMARK_MYOGENESIS	Details ...	193	0.42	1.55	0	0.007	0.12	5488	tags=31%, list=15%, signal=36%
13	HALLMARK_UV_RESPONSE_UP	Details ...	156	0.43	1.53	0	0.007	0.13	6865	tags=31%, list=19%, signal=39%
14	HALLMARK_P53_PATHWAY	Details ...	197	0.43	1.52	0	0.01	0.18	6309	tags=35%, list=17%, signal=42%
15	HALLMARK_COMPLEMENT	Details ...	192	0.41	1.52	0	0.009	0.18	5506	tags=30%, list=15%, signal=35%
16	HALLMARK_APICAL_SURFACE	Details ...	44	0.49	1.49	0.022	0.012	0.24	4364	tags=30%, list=12%, signal=34%
17	HALLMARK_BILE_ACID_METABOLISM	Details ...	106	0.42	1.47	0.01	0.014	0.27	6056	tags=27%, list=17%, signal=33%
18	HALLMARK_IL2_STAT5_SIGNALING	Details ...	194	0.4	1.46	0	0.015	0.31	5075	tags=28%, list=14%, signal=33%
19	HALLMARK_APOPTOSIS	Details ...	160	0.38	1.36	0.01	0.049	0.79	6080	tags=29%, list=17%, signal=34%
20	HALLMARK_EPITHELIAL_MESENCHYMAL_TRANSITION	Details ...	193	0.36	1.3	0.031	0.086	0.93	5273	tags=28%, list=15%, signal=33%
21	HALLMARK_SPERMATOGENESIS		121	0.36	1.28	0.094	0.093	0.96	6919	tags=30%, list=19%, signal=37%
22	HALLMARK_XENOBIOTIC_METABOLISM		191	0.35	1.25	0.062	0.121	0.98	4649	tags=21%, list=13%, signal=25%
23	HALLMARK_WNT_BETA_CATENIN_SIGNALING		42	0.38	1.13	0.302	0.306	1	4240	tags=21%, list=12%, signal=24%
24	HALLMARK_ESTROGEN_RESPONSE_LATE		192	0.29	1.09	0.273	0.368	1	3070	tags=15%, list=9%, signal=16%
25	HALLMARK_ESTROGEN_RESPONSE_EARLY		194	0.29	1.04	0.37	0.474	1	5160	tags=22%, list=14%, signal=26%
26	HALLMARK_HYPOXIA		195	0.26	0.93	0.67	0.719	1	5392	tags=21%, list=15%, signal=25%
27	HALLMARK_PEROXISOME		100	0.26	0.91	0.645	0.742	1	4845	tags=15%, list=13%, signal=17%
28	HALLMARK_ANGIOGENESIS		35	0.3	0.89	0.627	0.736	1	2177	tags=20%, list=6%, signal=21%
29	HALLMARK_DNA_REPAIR		150	0.13	0.45	1	1	1	7177	tags=14%, list=20%, signal=17%

## Sheet: 3D
Figure 3D Source Data
	External Database	Capan-2-ETO vs Capan-2-Ctrl (moderated t-test)			Normalized Log2 CPM								Expression Z scores
Probe Set ID	GeneSymbol	Fold Change	P-value	FDR	Capan-2-Ctrl-1	Capan-2-Ctrl-2	Capan-2-Ctrl-3	Capan-2-ETO-1	Capan-2-ETO-2	Capan-2-ETO-3	Mean	STDEV	Capan-2-Ctrl-1	Capan-2-Ctrl-2	Capan-2-Ctrl-3	Capan-2-ETO-1	Capan-2-ETO-2	Capan-2-ETO-3
XAF1	XAF1	42.7833	1.33978e-05	0.000144082	1.12109	1.21691	0.127549	6.11866	6.12288	6.48094	3.53134	2.9954	-0.804649	-0.77266	-1.13634	0.863766	0.865172	0.984711
CD86	CD86	16.9899	0.000674466	0.00287574	0.127549	0.127549	0.127549	4.7913	4.95735	2.89381	2.17085	2.35284	-0.868441	-0.868441	-0.868441	1.11374	1.18431	0.307269
BATF2	BATF2	14.3866	0.000253919	0.00136278	0.127549	1.55607	1.60426	4.7336	5.18014	4.91409	3.01928	2.17733	-1.32811	-0.672022	-0.64989	0.787347	0.992432	0.870241
BANK1	BANK1	12.8475	0.000199614	0.00113551	0.127549	0.127549	0.127549	4.7336	3.36676	3.33255	1.96926	2.07985	-0.885502	-0.885502	-0.885502	1.32911	0.671924	0.655476
CCRL2	CCRL2	12.0406	1.74274e-05	0.0001978	0.127549	0.127549	0.127549	3.20705	4.1071	3.83799	1.92246	1.98782	-0.902956	-0.902956	-0.902956	0.646227	1.09901	0.963629
IDO1	IDO1	10.7065	1.33978e-05	0.0192547	2.5764	0.127549	3.15125	5.24806	5.2029	5.66547	3.66194	2.13708	-0.507953	-1.65384	-0.238965	0.742192	0.721058	0.937507
UBE2L6	UBE2L6	10.381	1.33978e-05	0.00450828	2.92382	1.21691	2.92327	6.15208	5.4512	5.58835	4.04261	1.96533	-0.569263	-1.43777	-0.569544	1.07335	0.716723	0.78651
PDE4B	PDE4B	9.10339	1.33978e-05	0.0128251	2.11785	0.127549	0.127549	3.87408	4.72553	3.33255	2.38419	1.942	-0.137143	-1.16202	-1.16202	0.767196	1.20564	0.488343
KLRK1	KLRK1	8.8809	1.33978e-05	0.000184944	0.127549	0.127549	0.127549	3.11965	3.72223	2.99288	1.7029	1.74322	-0.903701	-0.903701	-0.903701	0.81272	1.15839	0.739995
GBP2	GBP2	8.64037	1.33978e-05	0.0130599	2.70174	3.87233	1.25766	5.59446	5.80362	5.76693	4.16612	1.896	-0.772357	-0.154952	-1.534	0.753343	0.863658	0.844311
SLAMF7	SLAMF7	7.23509	1.33978e-05	0.0377777	0.127549	0.127549	2.65237	4.36693	2.89402	4.21156	2.39666	1.88607	-1.20309	-1.20309	0.135577	1.04464	0.263699	0.962265
SELL	SELL	7.1268	1.33978e-05	0.00166683	0.127549	0.127549	0.127549	3.44135	2.18622	3.25483	1.54418	1.60987	-0.879966	-0.879966	-0.879966	1.17847	0.398821	1.06261
CASP1	CASP1	7.01214	5.52001e-05	0.000448846	4.43719	4.37887	5.01166	7.25814	7.75945	7.2397	6.01417	1.56598	-1.00703	-1.04426	-0.640178	0.794371	1.1145	0.782596
HLA-DQA1	HLA-DQA1	5.83434	1.33978e-05	0.000748295	0.127549	0.127549	0.127549	2.12078	3.00177	2.89381	1.39983	1.42647	-0.891913	-0.891913	-0.891913	0.505409	1.12301	1.04732
IL10RA	IL10RA	5.68046	1.33978e-05	0.00237433	0.127549	0.127549	0.127549	2.44226	3.36676	2.09165	1.38055	1.43443	-0.87352	-0.87352	-0.87352	0.740159	1.38466	0.495737
STAT4	STAT4	5.26068	1.33978e-05	0.0104051	4.02236	3.74555	2.31856	5.71862	5.57848	5.97512	4.55978	1.43935	-0.373375	-0.565692	-1.5571	0.805109	0.707744	0.983316
IRF8	IRF8	5.13279	1.33978e-05	0.00464001	0.127549	0.127549	0.127549	2.44226	1.76478	3.25483	1.30742	1.37592	-0.857516	-0.857516	-0.857516	0.824788	0.332406	1.41535
LGALS3BP	LGALS3BP	4.96823	1.33978e-05	1.01198e-05	9.11463	9.28658	9.27889	11.5114	11.4895	11.6174	10.3831	1.26896	-0.999584	-0.864083	-0.870139	0.889159	0.871901	0.972746
CDKN1A	CDKN1A	4.96492	7.05284e-09	3.23771e-06	12.0159	12.0521	11.9226	14.327	14.2843	14.3146	13.1528	1.26699	-0.897322	-0.868684	-0.970918	0.926819	0.893087	0.917017
CSF2RB	CSF2RB	4.90739	0.00904888	0.0223299	3.28598	2.85852	1.25766	5.09609	4.78707	4.40386	3.61486	1.44411	-0.227742	-0.523745	-1.63229	1.0257	0.811718	0.546354
ZBP1	ZBP1	4.62231	1.33978e-05	0.00143098	0.127549	0.127549	0.127549	1.92846	2.18622	2.89381	1.23186	1.25033	-0.883212	-0.883212	-0.883212	0.557137	0.763292	1.32921
IL2RB	IL2RB	4.41325	1.33978e-05	0.00707846	0.70821	0.772697	1.88351	3.11965	3.00177	3.66851	2.19239	1.26551	-1.17279	-1.12184	-0.244079	0.732717	0.639566	1.16643
IFI44L	IFI44L	4.09796	1.33978e-05	0.00331337	0.127549	0.127549	0.127549	2.5796	1.49661	2.41116	1.145	1.17392	-0.866712	-0.866712	-0.866712	1.22205	0.299513	1.07857
TNFSF10	TNFSF10	4.06206	1.33978e-05	0.00237591	0.127549	0.772697	0.127549	2.12078	2.18622	2.78742	1.3537	1.15599	-1.0607	-0.502607	-1.0607	0.66357	0.72018	1.24026
UBA7	UBA7	3.90636	1.33978e-05	0.00293173	5.86974	4.8175	5.25185	7.40398	7.25998	7.1726	6.29594	1.12989	-0.377211	-1.30849	-0.924063	0.980665	0.853215	0.775883
IFITM1	IFITM1	3.77338	1.33978e-05	0.0036289	5.5243	4.54036	4.68743	6.89996	6.65561	6.94409	5.87529	1.10611	-0.317316	-1.20687	-1.07391	0.92637	0.705458	0.966264
CXCL11	CXCL11	3.5845	1.79787e-05	0.000202235	4.57463	4.68557	4.61282	6.39476	6.64734	6.35624	5.54523	1.01435	-0.956864	-0.847491	-0.919216	0.837516	1.08652	0.799538
SAMD9	SAMD9	3.45807	1.33978e-05	0.000168159	7.05723	6.65662	6.91369	8.59022	8.75965	8.64757	7.77083	0.990276	-0.72061	-1.12515	-0.865556	0.827438	0.998531	0.88535
ICAM1	ICAM1	3.41915	1.33978e-05	1.65829e-05	7.32415	7.17003	7.20153	8.99659	9.03957	8.98045	8.11872	0.973017	-0.816605	-0.975001	-0.942628	0.902216	0.946385	0.885632
PTGS2	PTGS2	3.0664	1.33978e-05	0.000193013	7.04545	7.41362	7.35246	8.85325	8.83807	8.96985	8.07878	0.89533	-1.15414	-0.742924	-0.811238	0.865008	0.848049	0.99524
SERPING1	SERPING1	3.04095	1.33978e-05	0.00831204	4.43719	5.24997	4.53414	6.40404	6.68015	5.95069	5.5427	0.951545	-1.16181	-0.307628	-1.05991	0.905207	1.19537	0.428766
OAS2	OAS2	3.01474	1.33978e-05	0.000184751	7.19685	7.44966	7.42512	9.10722	8.92789	8.81262	8.15323	0.881455	-1.08499	-0.798191	-0.826031	1.0823	0.878848	0.748069
CCL2	CCL2	2.96518	0.0368246	0.0703705	0.127549	0.127549	1.25766	2.92717	2.18622	1.10372	1.28831	1.11551	-1.04056	-1.04056	-0.0274789	1.46915	0.804932	-0.165479
HLA-B	HLA-B	2.96284	1.33978e-05	4.45331e-06	11.1439	11.0604	11.1048	12.6372	12.664	12.7088	11.8865	0.858983	-0.864547	-0.961711	-0.910086	0.873876	0.905152	0.957316
IRF1	IRF1	2.85392	1.33978e-05	2.19079e-05	10.0275	9.91188	10.0858	11.4719	11.5746	11.5175	10.7649	0.831198	-0.887104	-1.02622	-0.816967	0.850673	0.974124	0.905494
PSMB8	PSMB8	2.84233	1.33978e-05	8.61699e-05	9.07028	8.82418	9.09241	10.4359	10.5266	10.5456	9.74916	0.83164	-0.816315	-1.11224	-0.789704	0.825811	0.934787	0.957665
SAMD9L	SAMD9L	2.82074	1.33978e-05	0.00047627	7.82203	8.26619	8.20888	9.49249	9.66254	9.6303	8.84707	0.835513	-1.22684	-0.695238	-0.763828	0.77248	0.976006	0.937421
IRF7	IRF7	2.75735	1.33978e-05	2.91856e-05	10.2497	10.2703	10.4095	11.7608	11.711	11.8475	11.0415	0.804542	-0.984139	-0.958539	-0.785484	0.89409	0.832251	1.00182
EPSTI1	EPSTI1	2.69652	1.33978e-05	0.0026303	4.86998	5.4864	5.17615	6.44955	6.8044	6.57188	5.89306	0.815727	-1.2542	-0.498524	-0.878861	0.682204	1.11721	0.832169
APOL6	APOL6	2.67577	8.20629e-05	0.000597229	5.88303	5.46644	5.67497	7.16844	7.02477	7.09109	6.38479	0.79013	-0.635034	-1.16228	-0.898361	0.991797	0.809972	0.893906
LAMP3	LAMP3	2.6627	1.33978e-05	0.000164545	0.127549	0.127549	0.127549	1.44407	1.49661	1.68065	0.833995	0.777851	-0.908202	-0.908202	-0.908202	0.784305	0.851849	1.08845
IFI27	IFI27	2.64374	1.33978e-05	0.000659074	7.6731	7.34967	7.85549	8.96873	9.04902	9.06827	8.32738	0.785834	-0.832597	-1.24416	-0.600491	0.816137	0.918311	0.942802
IL6	IL6	2.63093	1.33978e-05	2.72485e-05	9.80985	9.79669	9.95318	11.2326	11.2052	11.3086	10.551	0.767105	-0.966199	-0.983358	-0.779353	0.88849	0.852815	0.987605
PSMB9	PSMB9	2.6159	1.33978e-05	5.84726e-05	9.00642	9.24617	9.19667	10.5237	10.5666	10.5209	9.84341	0.764236	-1.0952	-0.781479	-0.846254	0.890121	0.946298	0.886508
TAP1	TAP1	2.60161	1.33978e-05	8.56577e-06	10.9196	10.8449	10.9646	12.2686	12.2894	12.3094	11.5994	0.756608	-0.898563	-0.997165	-0.838989	0.884442	0.911937	0.938338
HLA-DMA	HLA-DMA	2.57329	1.33978e-05	0.00164458	6.99124	7.57147	7.28798	8.62832	8.80312	8.51008	7.96537	0.774724	-1.25739	-0.508442	-0.874353	0.855729	1.08136	0.703104
FAS	FAS	2.50448	1.33978e-05	0.000682639	10.3655	10.6574	10.6576	12.0838	11.8719	11.6983	11.2224	0.743351	-1.15276	-0.760111	-0.759846	1.15874	0.873734	0.640247
NMI	NMI	2.4805	1.33978e-05	0.000265566	6.28471	6.28717	6.16728	7.69977	7.42392	7.54737	6.9017	0.72446	-0.851656	-0.848266	-1.01375	1.1016	0.720841	0.891234
IL7	IL7	2.36897	1.33978e-05	0.0138483	4.47279	3.81034	4.31634	5.74806	5.06063	5.52355	4.82195	0.749375	-0.465934	-1.34995	-0.674714	1.23584	0.318506	0.936247
C1R	C1R	2.34995	7.04337e-07	2.64449e-05	11.6291	11.6815	11.74	12.9143	12.8459	12.9882	12.2998	0.677543	-0.989945	-0.912635	-0.826309	0.906876	0.806056	1.01596

## Sheet: 3L
Figure 3L Source Data
Raw data	Control	IFN-α	ETO	ETO +IFN-α
Exp #1	0.337	0.387	0.126	0.18
Exp #2	0.383	0.391	0.143	0.192
Exp #3	0.384	0.337	0.137	0.182
Mean of control	0.368
Relative cell viability	Control	IFN-α	ETO	ETO +IFN-α
Exp #1	91.5761	105.163	34.2391	48.913
Exp #2	104.076	106.25	38.8587	52.1739
Exp #3	104.348	91.5761	37.2283	49.4565

## Sheet: 3M
Figure 3M Source Data
Raw data	Control	IFN-γ	ETO	ETO +IFN-γ
Exp #1	1.328	1.29	1.154	0.902
Exp #2	1.398	1.361	1.123	0.874
Exp #3	1.358	1.462	1.119	0.882
Mean of control	1.36133
Relative cell viability	Control	IFN-γ	ETO	ETO +IFN-γ
Exp #1	97.5514	94.76	84.7698	66.2586
Exp #2	102.693	99.9755	82.4927	64.2018
Exp #3	99.7551	107.395	82.1988	64.7894

## Sheet: 3N
Figure 3N Source Data
Raw data	siNC	ETO	siIFNAR1 #1	siIFNAR1 #1+ETO	siIFNAR1 #2	siIFNAR1 #2+ETO
Exp #1	2.178	0.679	1.718	0.42	1.14	0.295
Exp #2	2.17	0.662	1.735	0.432	1.127	0.298
Exp #3	2.233	0.648	1.716	0.42	1.145	0.295
Mean of siNC	2.19367
Relative cell viability	siNC	ETO	siIFNAR1 #1	siIFNAR1 #1+ETO	siIFNAR1 #2	siIFNAR1 #2+ETO
Exp #1	99.2858	30.9527	78.3164	19.146	51.9678	13.4478
Exp #2	98.9211	30.1778	79.0913	19.6931	51.3752	13.5846
Exp #3	101.793	29.5396	78.2252	19.146	52.1957	13.4478

## Sheet: 3O
Figure 3O Source Data
Raw data	Control	Anti-IFN-γ	ETO	Anti-IFN-γ+ETO
Exp #1	1.328	1.29	1.154	0.902
Exp #2	1.398	1.361	1.123	0.874
Exp #3	1.358	1.462	1.119	0.882
Mean of control	1.36133
Relative cell viability	Control	Anti-IFN-γ	ETO	Anti-IFN-γ+ETO
Exp #1	97.5514	94.76	84.7698	66.2586
Exp #2	102.693	99.9755	82.4927	64.2018
Exp #3	99.7551	107.395	82.1988	64.7894

## Sheet: S3A
Figure S3A Source Data
Capan-2 raw data													PC9 raw data													H661 raw data														Capan-2 Bar chart of top 10 (Combined-p <= 0.05 && Overlappings >= 5) enriched terms
Rank	GO ID	DEGs in Term	Combined p-value	Fold Enrich	Overlapping	DEGs	Term Size	Total Genes	Fisher p	Elim p	Weight p		Rank	GO ID	DEGs in Term	Combined p-value	Fold Enrich	Overlapping	DEGs	Term Size	Total Genes	Fisher p	Elim p	Weight p		Rank	GO ID	DEGs in Term	Combined p-value	Fold Enrich	Overlapping	DEGs	Term Size	Total Genes	Fisher p	Elim p	Weight p			Rank	GO ID	DEGs in Term	Combined p-value	Fold Enrich	Overlapping	DEGs	Term Size	Total Genes	Fisher p
1	GO:0007268	chemical synaptic transmission	2.17e-07	2.21	55	1908	185	14179	2.98e-18	0.00345	1		1	GO:0010628	positive regulation of gene expression	0.00984	2.14	3	91	218	14179	0.763	0.00112	0.00112		1	GO:0006952	defense response	0.000149	2.78	9	1149	40	14179	1.84e-10	0.135	0.133			1	GO:0007268	chemical synaptic transmission	2.17e-07	2.21	55	1908	185	14179	2.98e-18
2	GO:0006812	cation transport	5.94e-07	1.24	3	1908	18	14179	1.16e-17	0.135	0.135		2	GO:0002755	MyD88-dependent toll-like receptor signaling pathway	0.014	10.7	2	91	29	14179	0.0169	0.0128	0.0128		2	GO:0002250	adaptive immune response	0.000172	2.83	22	1149	96	14179	7.97e-12	0.643	1			3	GO:0006811	ion transport	7.97e-07	1.76	22	1908	93	14179	9.02e-19
3	GO:0006811	ion transport	7.97e-07	1.76	22	1908	93	14179	9.02e-19	0.561	1		3	GO:0031663	lipopolysaccharide-mediated signaling pathway	0.0222	11.1	2	91	28	14179	0.0298	0.0192	0.0192		3	GO:0055085	transmembrane transport	0.000568	1.69	24	1149	175	14179	4.69e-08	0.0625	0.0625			4	GO:0006952	defense response	1.27e-06	1.67	9	1908	40	14179	1.5e-17
4	GO:0006952	defense response	1.27e-06	1.67	9	1908	40	14179	1.5e-17	0.135	1		4	GO:0035902	response to immobilization stress	0.0237	31.2	3	91	15	14179	0.000196	0.0682	1		4	GO:0006954	inflammatory response	0.000643	2.14	49	1149	282	14179	2.67e-09	0.116	0.857			5	GO:0002376	immune system process	2.13e-06	2.03	6	1908	22	14179	5.37e-16
5	GO:0002376	immune system process	2.13e-06	2.03	6	1908	22	14179	5.37e-16	0.135	0.135		5	GO:0006959	humoral immune response	0.0248	12.6	3	91	37	14179	0.00101	0.123	0.123		5	GO:0006811	ion transport	0.000683	1.33	10	1149	93	14179	3.47e-10	0.92	0.997			6	GO:0030154	cell differentiation	2.9e-06	1.36	65	1908	356	14179	1.26e-16
6	GO:0030154	cell differentiation	2.9e-06	1.36	65	1908	356	14179	1.26e-16	0.439	0.439		6	GO:0006334	nucleosome assembly	0.025	12.1	6	91	77	14179	7.51e-05	0.208	1		6	GO:0002376	immune system process	0.000754	2.8	5	1149	22	14179	5.05e-10	0.921	0.921			7	GO:0050896	response to stimulus	6.99e-06	2.53	16	1908	47	14179	4.04e-16
7	GO:0050896	response to stimulus	6.99e-06	2.53	16	1908	47	14179	4.04e-16	0.849	0.999		7	GO:0045087	innate immune response	0.0427	4.31	8	91	289	14179	0.00211	0.192	0.192		7	GO:0006955	immune response	0.000869	2.15	41	1149	235	14179	7.46e-10	0.879	1			8	GO:0007275	multicellular organism development	7.9e-06	1.32	67	1908	378	14179	2.63e-15
8	GO:0007275	multicellular organism development	7.9e-06	1.32	67	1908	378	14179	2.63e-15	0.188	1		8	GO:0030325	adrenal gland development	0.0587	18.3	2	91	17	14179	0.00652	0.176	0.176		8	GO:0050896	response to stimulus	0.00155	2.89	11	1149	47	14179	3.57e-08	0.105	1			9	GO:0006955	immune response	9.63e-06	2.15	68	1908	235	14179	1.05e-15
9	GO:0006955	immune response	9.63e-06	2.15	68	1908	235	14179	1.05e-15	0.847	1		9	GO:0006954	inflammatory response	0.0687	4.42	8	91	282	14179	0.00546	0.0971	0.612		9	GO:0007186	G-protein coupled receptor signaling pathway	0.0016	1.71	47	1149	339	14179	4.12e-09	0.992	1			10	GO:0008015	blood circulation	1.74e-05	2.34	11	1908	35	14179	7.26e-13
10	GO:0008015	blood circulation	1.74e-05	2.34	11	1908	35	14179	7.26e-13	0.0571	0.127		10	GO:0035176	social behavior	0.069	7.79	2	91	40	14179	0.0272	0.11	0.11		10	GO:0007586	digestion	0.00163	3.67	11	1149	37	14179	1.27e-08	0.345	1			11	GO:0002250	adaptive immune response	2.95e-05	3.1	40	1908	96	14179	1.27e-13
11	GO:0002250	adaptive immune response	2.95e-05	3.1	40	1908	96	14179	1.27e-13	0.347	0.58		11	GO:0009636	response to toxic substance	0.0714	6.23	3	91	75	14179	0.00395	0.0923	1		11	GO:0007166	cell surface receptor signaling pathway	0.00193	1.85	31	1149	207	14179	2.31e-06	0.0557	0.0557
12	GO:0034220	ion transmembrane transport	6.25e-05	1.46	35	1908	178	14179	2.17e-11	0.0507	0.222		12	GO:0016569	covalent chromatin modification	0.0742	3.06	2	91	102	14179	0.63	0.0255	0.0255		12	GO:0007267	cell-cell signaling	0.00246	2.28	31	1149	168	14179	1.17e-05	0.013	0.0971			PC9 Bar chart of top 2 (Combined-p <= 0.05 && Overlappings >= 5) enriched terms
13	GO:0030155	regulation of cell adhesion	6.88e-05	1.37	7	1908	38	14179	4.12e-06	0.000281	0.000281		13	GO:0050830	defense response to Gram-positive bacterium	0.0846	9.95	3	91	47	14179	0.0034	0.178	1		13	GO:0007275	multicellular organism development	0.00258	1.4	43	1149	378	14179	8.61e-05	0.00851	0.0236			Rank	GO ID	DEGs in Term	Combined p-value	Fold Enrich	Overlapping	DEGs	Term Size	Total Genes	Fisher p
14	GO:0007267	cell-cell signaling	7.32e-05	1.95	44	1908	168	14179	6.66e-13	0.589	1		14	GO:0006955	immune response	0.085	1.99	3	91	235	14179	0.00112	0.546	1		14	GO:0006812	cation transport	0.00262	4.11	6	1149	18	14179	1.81e-08	0.996	1			6	GO:0006334	nucleosome assembly	0.025	12.1	6	91	77	14179	7.51e-05
15	GO:0055085	transmembrane transport	0.000156	1.57	37	1908	175	14179	1.09e-11	0.352	1		15	GO:0032496	response to lipopolysaccharide	0.101	3.46	3	91	135	14179	0.00602	0.171	1		15	GO:0007154	cell communication	0.0028	1.76	3	1149	21	14179	9.07e-07	0.156	0.156			7	GO:0045087	innate immune response	0.0427	4.31	8	91	289	14179	0.00211
16	GO:0050808	synapse organization	0.000176	2.97	12	1908	30	14179	2.32e-08	0.0153	0.0153		16	GO:0010043	response to zinc ion	0.103	10.7	2	91	29	14179	0.00247	0.449	1		16	GO:0034220	ion transmembrane transport	0.00283	1.8	26	1149	178	14179	2.8e-07	0.0808	1
17	GO:0007155	cell adhesion	0.000248	1.96	94	1908	357	14179	7.09e-11	0.216	1		17	GO:0045471	response to ethanol	0.124	7.79	4	91	80	14179	0.00379	0.509	1		17	GO:0042127	regulation of cell proliferation	0.00286	2	24	1149	148	14179	2.37e-07	0.0988	1			H661 Bar chart of top 10 (Combined-p <= 0.05 && Overlappings >= 5) enriched terms
18	GO:0007166	cell surface receptor signaling pathway	0.000304	1.97	55	1908	207	14179	2.82e-11	1	1		18	GO:0042572	retinol metabolic process	0.146	12.5	2	91	25	14179	0.0112	0.281	1		18	GO:0030154	cell differentiation	0.00363	1.53	44	1149	356	14179	1.86e-05	0.0161	0.16			Rank	GO ID	DEGs in Term	Combined p-value	Fold Enrich	Overlapping	DEGs	Term Size	Total Genes	Fisher p
19	GO:0098655	cation transmembrane transport	0.000346	2.04	11	1908	40	14179	6.22e-11	0.681	0.98		19	GO:0016338	calcium-independent cell-cell adhesion via plasma membrane cell-adhesion molecules	0.15	16.4	2	91	19	14179	0.00794	0.427	1		19	GO:0035725	sodium ion transmembrane transport	0.0038	2.28	12	1149	65	14179	0.00391	0.00374	0.00374			1	GO:0006952	defense response	0.000149	2.78	9	1149	40	14179	1.84e-10
20	GO:0042102	positive regulation of T cell proliferation	0.00045	2.81	17	1908	45	14179	1.37e-06	0.00816	0.00816		20	GO:0051602	response to electrical stimulus	0.161	16.4	2	91	19	14179	0.0179	0.233	1		20	GO:0001541	ovarian follicle development	0.00395	1.76	5	1149	35	14179	0.0685	0.000949	0.000949			2	GO:0002250	adaptive immune response	0.000172	2.83	22	1149	96	14179	7.97e-12
21	GO:0032496	response to lipopolysaccharide	0.000507	1.82	33	1908	135	14179	6.2e-05	0.00203	0.00104		21	GO:0007601	visual perception	0.168	4.81	5	91	162	14179	0.00478	1	1		21	GO:0030217	T cell differentiation	0.00476	2.37	5	1149	26	14179	1.32e-07	0.816	1			3	GO:0055085	transmembrane transport	0.000568	1.69	24	1149	175	14179	4.69e-08
22	GO:0042110	T cell activation	0.000545	1.56	8	1908	38	14179	5.72e-09	0.0283	1		22	GO:0008285	negative regulation of cell proliferation	0.17	3.2	7	91	341	14179	0.00983	0.499	1		22	GO:0050776	regulation of immune response	0.00528	2.29	15	1149	81	14179	2.01e-06	0.0733	1			4	GO:0006954	inflammatory response	0.000643	2.14	49	1149	282	14179	2.67e-09
23	GO:0010107	potassium ion import	0.000618	2.91	9	1908	23	14179	0.00277	0.000292	0.000292		23	GO:0019731	antibacterial humoral response	0.173	14.8	2	91	21	14179	0.0148	0.352	1		23	GO:0050900	leukocyte migration	0.0056	1.73	15	1149	107	14179	9.42e-06	0.0186	1			5	GO:0006811	ion transport	0.000683	1.33	10	1149	93	14179	3.47e-10
24	GO:0007188	adenylate cyclase-modulating G-protein coupled receptor signaling pathway	0.000668	1.65	6	1908	27	14179	0.000264	0.00872	0.000129		24	GO:0050896	response to stimulus	0.18	6.63	2	91	47	14179	0.00846	0.688	1		24	GO:0008284	positive regulation of cell proliferation	0.0076	1.49	45	1149	373	14179	3.14e-06	0.14	1			6	GO:0002376	immune system process	0.000754	2.8	5	1149	22	14179	5.05e-10
25	GO:0009653	anatomical structure morphogenesis	0.000786	1.52	16	1908	78	14179	6e-08	0.0339	0.239		25	GO:0051897	positive regulation of protein kinase B signaling	0.19	6.77	3	91	69	14179	0.00993	0.691	1		25	GO:0060021	roof of mouth development	0.00852	1.54	9	1149	72	14179	0.198	0.00177	0.00177			7	GO:0006955	immune response	0.000869	2.15	41	1149	235	14179	7.46e-10
26	GO:0030030	cell projection organization	0.00079	1.1	4	1908	27	14179	0.000928	0.000728	0.000728		26	GO:0007612	learning	0.194	7.08	2	91	44	14179	0.164	0.0442	1		26	GO:0071805	potassium ion transmembrane transport	0.0103	1.91	15	1149	97	14179	0.000566	0.0436	0.0436			8	GO:0050896	response to stimulus	0.00155	2.89	11	1149	47	14179	3.57e-08
27	GO:0007338	single fertilization	0.000804	1.11	6	1908	40	14179	0.107	0.000183	2.67e-05		27	GO:0033198	response to ATP	0.215	18.3	2	91	17	14179	0.0139	0.715	1		27	GO:0034765	regulation of ion transmembrane transport	0.0124	2.31	17	1149	91	14179	0.00359	0.00657	0.081			9	GO:0007186	G-protein coupled receptor signaling pathway	0.0016	1.71	47	1149	339	14179	4.12e-09
28	GO:0048468	cell development	0.000889	2.09	9	1908	32	14179	5.68e-09	0.352	0.352		28	GO:0007584	response to nutrient	0.224	4.72	2	91	66	14179	0.0298	0.376	1		28	GO:0007187	G-protein coupled receptor signaling pathway, coupled to cyclic nucleotide second messenger	0.0126	3.8	8	1149	26	14179	2.02e-06	0.995	1			10	GO:0007586	digestion	0.00163	3.67	11	1149	37	14179	1.27e-08
29	GO:0006954	inflammatory response	0.00101	1.79	68	1908	282	14179	3.07e-08	0.0337	1		29	GO:0042593	glucose homeostasis	0.229	3.9	2	91	80	14179	0.0283	0.424	1		29	GO:0009749	response to glucose	0.0141	1.08	5	1149	57	14179	0.697	0.002	0.002
30	GO:0008016	regulation of heart contraction	0.00101	1.71	6	1908	26	14179	9.72e-09	0.107	1		30	GO:0043433	negative regulation of DNA binding transcription factor activity	0.252	5.99	2	91	52	14179	0.0495	0.325	1		30	GO:0007188	adenylate cyclase-modulating G-protein coupled receptor signaling pathway	0.0142	3.2	7	1149	27	14179	7.22e-06	0.398	1
31	GO:0042391	regulation of membrane potential	0.00111	1.8	15	1908	62	14179	3.1e-09	0.439	1		31	GO:0006915	apoptotic process	0.259	2.28	7	91	479	14179	0.457	0.038	1		31	GO:0016125	sterol metabolic process	0.0144	4.94	6	1149	15	14179	0.00557	1	0.000532
32	GO:0032729	positive regulation of interferon-gamma production	0.00118	3.41	17	1908	37	14179	1.32e-06	0.0351	0.0351		32	GO:0071320	cellular response to cAMP	0.273	6.93	2	91	45	14179	0.0339	0.608	0.986		32	GO:0001816	cytokine production	0.0145	2.47	4	1149	20	14179	1.36e-05	0.224	1
33	GO:0051496	positive regulation of stress fiber assembly	0.0012	1.65	8	1908	36	14179	0.102	0.00089	1.91e-05		33	GO:0035725	sodium ion transmembrane transport	0.275	7.19	3	91	65	14179	0.0431	0.483	1		33	GO:0007601	visual perception	0.015	2.29	30	1149	162	14179	1.51e-05	0.224	1
34	GO:0007186	G-protein coupled receptor signaling pathway	0.00125	1.67	76	1908	339	14179	3.8e-09	0.515	1		34	GO:0007155	cell adhesion	0.279	2.62	6	91	357	14179	0.0488	0.445	1		34	GO:0006959	humoral immune response	0.0155	2.67	8	1149	37	14179	8.04e-06	0.463	1
35	GO:0045087	innate immune response	0.00127	1.77	69	1908	289	14179	5.34e-09	0.438	0.876		35	GO:0030199	collagen fibril organization	0.286	8.66	2	91	36	14179	0.0236	0.997	1		35	GO:0007417	central nervous system development	0.0159	1.5	13	1149	107	14179	0.0153	0.00673	0.039
36	GO:0006816	calcium ion transport	0.00172	1.99	15	1908	56	14179	4.14e-08	0.352	0.352		36	GO:0032760	positive regulation of tumor necrosis factor production	0.294	8.66	2	91	36	14179	0.0367	0.691	1		36	GO:0042110	T cell activation	0.016	2.6	8	1149	38	14179	7.19e-06	0.571	1
37	GO:0030182	neuron differentiation	0.0019	1.63	18	1908	82	14179	1.82e-08	0.375	1		37	GO:0008015	blood circulation	0.309	8.9	2	91	35	14179	0.0468	0.632	1		37	GO:0050727	regulation of inflammatory response	0.0177	2.27	9	1149	49	14179	1.07e-05	0.517	1
38	GO:0050900	leukocyte migration	0.00211	2.01	29	1908	107	14179	1.29e-08	0.728	1		38	GO:0006629	lipid metabolic process	0.309	2.89	2	91	108	14179	0.0333	0.889	1		38	GO:0006816	calcium ion transport	0.0194	1.76	8	1149	56	14179	6.15e-05	0.345	0.345
39	GO:0007187	G-protein coupled receptor signaling pathway, coupled to cyclic nucleotide second messenger	0.00223	2.29	8	1908	26	14179	3.36e-05	0.0181	0.0181		39	GO:0007186	G-protein coupled receptor signaling pathway	0.309	2.76	6	91	339	14179	0.0434	0.681	1		39	GO:0001525	angiogenesis	0.0196	1.44	23	1149	197	14179	0.0157	0.0218	0.0218
40	GO:0007399	nervous system development	0.00241	1.52	51	1908	250	14179	1.63e-08	0.853	1		40	GO:0071222	cellular response to lipopolysaccharide	0.367	3.28	2	91	95	14179	0.0495	1	1		40	GO:0042060	wound healing	0.0196	1.14	6	1149	65	14179	0.00602	0.0353	0.0353
41	GO:0001816	cytokine production	0.00242	2.23	6	1908	20	14179	1.54e-08	0.919	1															41	GO:0014065	phosphatidylinositol 3-kinase signaling	0.0207	2.47	5	1149	25	14179	0.000123	0.072	1
42	GO:0086010	membrane depolarization during action potential	0.00266	4.29	15	1908	26	14179	3.2e-08	0.628	0.932															42	GO:0007159	leukocyte cell-cell adhesion	0.0209	1.37	2	1149	18	14179	0.0014	0.0811	0.0811
43	GO:0042060	wound healing	0.00267	1.26	11	1908	65	14179	0.000141	0.00398	0.034															43	GO:0016055	Wnt signaling pathway	0.021	1.2	16	1149	164	14179	0.727	0.00909	0.0014
44	GO:0034341	response to interferon-gamma	0.00278	2.48	7	1908	21	14179	1.3e-07	0.405	0.405															44	GO:0010862	positive regulation of pathway-restricted SMAD protein phosphorylation	0.0212	1.54	5	1149	40	14179	0.221	0.00657	0.00657
45	GO:0006814	sodium ion transport	0.00301	2.79	24	1908	64	14179	4.69e-08	0.579	1															45	GO:0042742	defense response to bacterium	0.0233	1.65	8	1149	60	14179	4.03e-05	0.315	1
46	GO:0060078	regulation of postsynaptic membrane potential	0.00314	4.69	12	1908	19	14179	6.03e-08	0.515	1															46	GO:0050830	defense response to Gram-positive bacterium	0.0234	3.68	14	1149	47	14179	1.31e-05	0.975	1
47	GO:0060828	regulation of canonical Wnt signaling pathway	0.00319	1.31	3	1908	17	14179	0.387	1.74e-05	0.0048															47	GO:0032755	positive regulation of interleukin-6 production	0.024	1.95	6	1149	38	14179	0.00475	0.0186	0.155
48	GO:0001819	positive regulation of cytokine production	0.00324	2.48	7	1908	21	14179	4e-08	0.847	1															48	GO:0030902	hindbrain development	0.0254	2.31	3	1149	16	14179	0.0025	0.0811	0.0811
49	GO:0042127	regulation of cell proliferation	0.00347	1.36	27	1908	148	14179	1.73e-07	0.241	1															49	GO:0098655	cation transmembrane transport	0.0264	1.54	5	1149	40	14179	1.84e-05	1	1
50	GO:0001508	action potential	0.0037	1.98	4	1908	15	14179	2.8e-06	0.135	0.135															50	GO:0007596	blood coagulation	0.0269	1.99	25	1149	155	14179	0.0102	0.0436	0.0436
51	GO:0061337	cardiac conduction	0.00399	2.67	14	1908	39	14179	4.7e-07	0.367	0.367															51	GO:0007605	sensory perception of sound	0.0273	2.37	23	1149	120	14179	3.45e-05	0.59	1
52	GO:0022008	neurogenesis	0.00413	1.81	9	1908	37	14179	2.09e-07	0.583	0.579															52	GO:0045087	innate immune response	0.0299	1.71	40	1149	289	14179	3.79e-05	0.849	0.83
53	GO:0007159	leukocyte cell-cell adhesion	0.00416	2.48	6	1908	18	14179	1.77e-07	0.637	0.637															53	GO:1903779	regulation of cardiac conduction	0.0303	2.9	12	1149	51	14179	0.0014	0.0199	1
54	GO:0042552	myelination	0.00416	1.37	7	1908	38	14179	0.152	0.000688	0.000688															54	GO:1902476	chloride transmembrane transport	0.0313	2.69	17	1149	78	14179	0.000137	0.224	1
55	GO:0050776	regulation of immune response	0.00422	2.84	31	1908	81	14179	8.89e-08	0.847	1															55	GO:0006813	potassium ion transport	0.0324	2.55	13	1149	63	14179	7.65e-05	0.447	1
56	GO:0008284	positive regulation of cell proliferation	0.00441	1.3	65	1908	373	14179	1.28e-05	0.00674	1															56	GO:0048167	regulation of synaptic plasticity	0.0326	1.76	4	1149	28	14179	0.0724	0.00377	0.127
57	GO:0048514	blood vessel morphogenesis	0.0045	1.39	3	1908	16	14179	1.99e-05	0.0533	0.0859															57	GO:0007155	cell adhesion	0.0326	1.59	46	1149	357	14179	0.000184	0.435	0.435
58	GO:0006836	neurotransmitter transport	0.00466	1.86	5	1908	20	14179	8.44e-07	0.347	0.347															58	GO:0022008	neurogenesis	0.0333	1.67	5	1149	37	14179	0.151	0.0313	0.00783
59	GO:0043113	receptor clustering	0.00519	1.56	4	1908	19	14179	0.0203	0.00262	0.00262															59	GO:0030097	hemopoiesis	0.0347	1.23	5	1149	50	14179	5.23e-05	0.8	1
60	GO:0043252	sodium-independent organic anion transport	0.00524	2.19	5	1908	17	14179	0.0676	0.00146	0.00146															60	GO:0032496	response to lipopolysaccharide	0.0351	2.19	24	1149	135	14179	8.54e-05	0.508	1
61	GO:0006935	chemotaxis	0.00534	1.86	21	1908	84	14179	1.69e-06	0.0901	1															61	GO:0014068	positive regulation of phosphatidylinositol 3-kinase signaling	0.0352	1.98	9	1149	56	14179	0.035	0.0353	0.0353
62	GO:0060333	interferon-gamma-mediated signaling pathway	0.00536	2.8	23	1908	61	14179	8.49e-06	0.135	0.135															62	GO:0098869	cellular oxidant detoxification	0.038	1.91	9	1149	58	14179	0.0455	0.0116	0.104
63	GO:0034612	response to tumor necrosis factor	0.00556	1.01	3	1908	22	14179	0.0806	0.00146	0.00146															63	GO:0051480	regulation of cytosolic calcium ion concentration	0.0394	3.09	6	1149	24	14179	7.66e-05	0.8	1
64	GO:0051260	protein homooligomerization	0.00565	1.65	33	1908	149	14179	0.0118	0.00391	0.00391															64	GO:0000183	chromatin silencing at rDNA	0.0406	3.53	8	1149	28	14179	0.00212	0.0327	0.964
65	GO:0050804	modulation of chemical synaptic transmission	0.00571	1.49	3	1908	15	14179	2.08e-07	0.947	0.947															65	GO:0007268	chemical synaptic transmission	0.0413	1.73	26	1149	185	14179	0.000104	0.675	1
66	GO:0048812	neuron projection morphogenesis	0.00596	1.69	10	1908	44	14179	3.76e-06	0.0776	0.727															66	GO:0050853	B cell receptor signaling pathway	0.0418	2.82	8	1149	35	14179	0.000598	0.122	1
67	GO:0006813	potassium ion transport	0.00606	2.12	18	1908	63	14179	3.24e-07	0.704	0.977															67	GO:0006883	cellular sodium ion homeostasis	0.0424	5.4	7	1149	16	14179	0.000135	0.565	1
68	GO:0050885	neuromuscular process controlling balance	0.00626	2.23	12	1908	40	14179	0.000199	0.0351	0.0351															68	GO:0019369	arachidonic acid metabolic process	0.0434	4.32	7	1149	20	14179	0.00019	0.454	0.943
69	GO:0048666	neuron development	0.00638	1.11	6	1908	40	14179	4.12e-06	0.251	0.251															69	GO:0042572	retinol metabolic process	0.0444	3.95	8	1149	25	14179	0.000564	0.156	1
70	GO:0030217	T cell differentiation	0.00644	1.71	6	1908	26	14179	1.92e-05	0.0353	0.394															70	GO:0051290	protein heterotetramerization	0.0448	3.37	9	1149	33	14179	0.000949	0.0948	1
71	GO:0000902	cell morphogenesis	0.0065	1.12	8	1908	53	14179	1.46e-05	0.137	0.137															71	GO:0009653	anatomical structure morphogenesis	0.0469	1.9	12	1149	78	14179	0.0106	0.0988	0.0988
72	GO:0048813	dendrite morphogenesis	0.00702	2.19	10	1908	34	14179	4.26e-05	0.0901	0.0901															72	GO:0007517	muscle organ development	0.0478	1.17	7	1149	74	14179	0.0166	0.0811	0.0811
73	GO:0034097	response to cytokine	0.00721	1.35	8	1908	44	14179	3.83e-07	0.984	0.993															73	GO:0071773	cellular response to BMP stimulus	0.0504	2.06	4	1149	24	14179	0.804	0.0126	0.0126
74	GO:0050870	positive regulation of T cell activation	0.00724	2.48	5	1908	15	14179	2.63e-06	0.224	0.644															74	GO:0006629	lipid metabolic process	0.0523	1.94	17	1149	108	14179	0.00177	0.0811	1
75	GO:0042098	T cell proliferation	0.00727	1.75	4	1908	17	14179	2.75e-06	0.203	0.687															75	GO:0007169	transmembrane receptor protein tyrosine kinase signaling pathway	0.0524	2.5	16	1149	79	14179	0.0463	0.0557	0.0557
76	GO:0051899	membrane depolarization	0.00752	3.23	10	1908	23	14179	1.27e-06	0.58	0.58															76	GO:0035924	cellular response to vascular endothelial growth factor stimulus	0.0528	1.85	3	1149	20	14179	0.0236	0.0791	0.0791
77	GO:0071346	cellular response to interferon-gamma	0.00759	1.98	8	1908	30	14179	3.52e-06	0.352	0.352															77	GO:0006874	cellular calcium ion homeostasis	0.0536	2.12	11	1149	64	14179	0.000162	0.971	0.98
78	GO:0006865	amino acid transport	0.00774	1.63	7	1908	32	14179	0.0239	0.00448	0.00433															78	GO:0042102	positive regulation of T cell proliferation	0.0539	2.19	8	1149	45	14179	0.000648	0.492	0.492
79	GO:0071345	cellular response to cytokine stimulus	0.0083	2.48	7	1908	21	14179	5.84e-07	0.98	1															79	GO:0050729	positive regulation of inflammatory response	0.0548	1.61	6	1149	46	14179	0.000686	0.24	1
80	GO:0042493	response to drug	0.00843	1.31	47	1908	267	14179	3.19e-05	0.137	0.137															80	GO:0055117	regulation of cardiac muscle contraction	0.0556	3.63	5	1149	17	14179	0.0092	0.0186	1
81	GO:0030193	regulation of blood coagulation	0.00872	1.39	3	1908	16	14179	9.12e-07	0.728	1															81	GO:0048015	phosphatidylinositol-mediated signaling	0.0564	1.19	9	1149	93	14179	0.00238	0.0755	1
82	GO:0002576	platelet degranulation	0.00894	1.94	24	1908	92	14179	0.000292	0.0494	0.0494															82	GO:0008202	steroid metabolic process	0.057	1.93	5	1149	32	14179	0.000214	0.906	0.955
83	GO:0001894	tissue homeostasis	0.00907	2.32	5	1908	16	14179	3.51e-06	0.212	1															83	GO:0022400	regulation of rhodopsin mediated signaling pathway	0.057	3.6	7	1149	24	14179	0.00229	0.0811	1
84	GO:0035725	sodium ion transmembrane transport	0.00911	2.63	23	1908	65	14179	2.15e-06	0.352	1															84	GO:0007492	endoderm development	0.0587	2.18	3	1149	17	14179	0.0017	0.345	0.345
85	GO:0001523	retinoid metabolic process	0.00926	2.75	17	1908	46	14179	1.37e-06	0.58	1															85	GO:0007218	neuropeptide signaling pathway	0.0612	2.47	12	1149	60	14179	0.00278	0.0824	1
86	GO:0030198	extracellular matrix organization	0.0094	1.73	42	1908	180	14179	1.09e-06	0.764	1															86	GO:0042744	hydrogen peroxide catabolic process	0.062	3.09	4	1149	16	14179	0.0122	0.14	0.14
87	GO:0045071	negative regulation of viral genome replication	0.00954	2.61	13	1908	37	14179	0.000688	0.0355	0.0355															87	GO:0006805	xenobiotic metabolic process	0.0638	2.94	15	1149	63	14179	0.00247	0.117	0.902
88	GO:0045165	cell fate commitment	0.01	1.69	10	1908	44	14179	0.000141	0.0071	1															88	GO:0001676	long-chain fatty acid metabolic process	0.0654	2.47	4	1149	20	14179	0.00197	0.376	0.376
89	GO:0007611	learning or memory	0.0106	2.31	9	1908	29	14179	3.83e-06	0.31	1															89	GO:0014066	regulation of phosphatidylinositol 3-kinase signaling	0.0661	1.66	9	1149	67	14179	0.00186	0.156	1
90	GO:0007586	digestion	0.0116	2.01	10	1908	37	14179	5.11e-05	0.0308	1															90	GO:0061337	cardiac conduction	0.067	1.27	4	1149	39	14179	0.00727	0.0414	1
91	GO:0019221	cytokine-mediated signaling pathway	0.0118	1.7	22	1908	96	14179	1.67e-06	0.998	1															91	GO:0006335	DNA replication-dependent nucleosome assembly	0.0674	4.11	8	1149	24	14179	0.000413	0.742	1
92	GO:0035556	intracellular signal transduction	0.0129	1.13	49	1908	323	14179	0.0264	0.00427	0.0189															92	GO:0007204	positive regulation of cytosolic calcium ion concentration	0.0675	1.88	14	1149	92	14179	0.000372	0.835	0.989
93	GO:0071805	potassium ion transmembrane transport	0.0133	2.07	27	1908	97	14179	8.17e-06	0.289	1															93	GO:0009887	animal organ morphogenesis	0.0678	2.06	14	1149	84	14179	0.0474	0.0811	0.0811
94	GO:0051259	protein complex oligomerization	0.014	1.14	8	1908	52	14179	0.0128	0.0146	0.0146															94	GO:0019731	antibacterial humoral response	0.0682	3.53	6	1149	21	14179	0.00167	0.435	0.435
95	GO:0009617	response to bacterium	0.014	1.56	4	1908	19	14179	2.75e-06	0.997	1															95	GO:0006821	chloride transport	0.0711	1.65	4	1149	30	14179	0.000539	0.667	1
96	GO:0010951	negative regulation of endopeptidase activity	0.0148	2.62	31	1908	88	14179	6.6e-05	0.0494	1															96	GO:0043392	negative regulation of DNA binding	0.0719	1.42	3	1149	26	14179	0.252	0.0236	0.0626
97	GO:0006874	cellular calcium ion homeostasis	0.0149	1.97	17	1908	64	14179	4.58e-06	0.728	1															97	GO:0038083	peptidyl-tyrosine autophosphorylation	0.0746	2.47	8	1149	40	14179	0.0266	0.125	0.125
98	GO:0006810	transport	0.0154	1.35	44	1908	243	14179	6.3e-05	0.241	0.241															98	GO:0042098	T cell proliferation	0.0748	1.45	2	1149	17	14179	0.00474	0.0901	0.979
99	GO:0001569	branching involved in blood vessel morphogenesis	0.0154	1.1	4	1908	27	14179	0.502	0.000698	0.0105															99	GO:0060326	cell chemotaxis	0.0751	1.15	4	1149	43	14179	0.000524	0.898	0.898
100	GO:0042572	retinol metabolic process	0.0155	3.27	11	1908	25	14179	0.000185	0.141	0.141															100	GO:0001819	positive regulation of cytokine production	0.0757	1.76	3	1149	21	14179	0.000743	0.629	0.927
101	GO:0019228	neuronal action potential	0.0156	4.2	13	1908	23	14179	8.57e-06	0.439	1															101	GO:0017144	drug metabolic process	0.0774	3.09	5	1149	20	14179	0.00922	0.224	0.224
102	GO:0009611	response to wounding	0.0156	1.51	11	1908	54	14179	5.22e-06	0.728	1															102	GO:0032753	positive regulation of interleukin-4 production	0.0793	3.86	5	1149	16	14179	0.00222	0.224	1
103	GO:0007420	brain development	0.0161	1.03	24	1908	174	14179	0.0197	0.0146	0.0146															103	GO:0030855	epithelial cell differentiation	0.0806	1.57	8	1149	63	14179	0.00054	0.97	1
104	GO:0007271	synaptic transmission, cholinergic	0.0162	3.41	11	1908	24	14179	1.07e-05	0.398	1															104	GO:0030593	neutrophil chemotaxis	0.0821	3.09	10	1149	40	14179	0.000615	0.901	1
105	GO:0090090	negative regulation of canonical Wnt signaling pathway	0.0171	1.06	22	1908	154	14179	0.429	1.16e-05	1															105	GO:0034097	response to cytokine	0.0826	1.4	5	1149	44	14179	0.000744	0.775	0.976
106	GO:0001568	blood vessel development	0.0189	1.13	5	1908	33	14179	1.3e-05	0.517	1															106	GO:0008206	bile acid metabolic process	0.083	1.65	2	1149	15	14179	0.0236	0.0804	0.301
107	GO:0051480	regulation of cytosolic calcium ion concentration	0.0191	2.17	7	1908	24	14179	6.43e-05	0.108	1															107	GO:0045595	regulation of cell differentiation	0.0882	1.42	3	1149	26	14179	0.00103	0.667	1
108	GO:0060079	excitatory postsynaptic potential	0.0191	2.17	7	1908	24	14179	0.00113	0.0787	0.0787															108	GO:0019216	regulation of lipid metabolic process	0.0892	2.68	5	1149	23	14179	0.00071	1	1
109	GO:0008037	cell recognition	0.0192	1.86	5	1908	20	14179	1.31e-05	0.594	0.91															109	GO:0048839	inner ear development	0.0903	2.18	6	1149	34	14179	0.0146	0.224	0.224
110	GO:0048754	branching morphogenesis of an epithelial tube	0.0197	1.01	3	1908	22	14179	0.0177	0.00876	0.0494															110	GO:0042493	response to drug	0.0907	1.34	29	1149	267	14179	0.00263	0.533	0.533
111	GO:0008217	regulation of blood pressure	0.0198	2.33	16	1908	51	14179	1.28e-05	0.645	0.944															111	GO:0016266	O-glycan processing	0.0916	2.69	12	1149	55	14179	0.00127	0.606	1
112	GO:0060048	cardiac muscle contraction	0.02	2.1	11	1908	39	14179	0.000684	0.108	0.108															112	GO:0033077	T cell differentiation in thymus	0.092	1.9	4	1149	26	14179	0.0012	0.732	0.889
113	GO:0071310	cellular response to organic substance	0.0202	1.86	4	1908	16	14179	0.000453	0.135	0.135															113	GO:0006334	nucleosome assembly	0.0933	3.05	19	1149	77	14179	0.00127	0.638	1
114	GO:0050890	cognition	0.0204	1.86	8	1908	32	14179	1.03e-05	0.824	1															114	GO:0006869	lipid transport	0.0944	1.7	8	1149	58	14179	0.0104	0.0811	1
115	GO:0009887	animal organ morphogenesis	0.0206	1.33	15	1908	84	14179	3.06e-05	0.372	0.771															115	GO:0046854	phosphatidylinositol phosphorylation	0.0949	1.91	13	1149	84	14179	0.0173	0.223	0.223
116	GO:0048839	inner ear development	0.0208	2.62	12	1908	34	14179	3.2e-05	0.28	1															116	GO:0045165	cell fate commitment	0.0964	3.65	13	1149	44	14179	0.00112	0.8	1
117	GO:0007193	adenylate cyclase-inhibiting G-protein coupled receptor signaling pathway	0.021	2.48	13	1908	39	14179	2.86e-05	0.401	0.806															117	GO:0006855	drug transmembrane transport	0.0982	3.63	5	1149	17	14179	0.00156	0.606	1
118	GO:0007215	glutamate receptor signaling pathway	0.0213	3.47	7	1908	15	14179	1.26e-05	0.831	0.92															118	GO:0072593	reactive oxygen species metabolic process	0.0986	1.76	4	1149	28	14179	0.00334	0.287	1
119	GO:0050767	regulation of neurogenesis	0.0222	1.39	3	1908	16	14179	0.000908	0.109	0.109															119	GO:0030155	regulation of cell adhesion	0.0994	1.95	6	1149	38	14179	0.00114	0.857	1
120	GO:0034765	regulation of ion transmembrane transport	0.0225	2.53	31	1908	91	14179	1.16e-05	0.994	0.995															120	GO:0045766	positive regulation of angiogenesis	0.1	2.16	18	1149	103	14179	0.00177	0.571	1
121	GO:0001503	ossification	0.0226	1.39	12	1908	64	14179	0.115	0.0187	0.0054															121	GO:0071222	cellular response to lipopolysaccharide	0.104	1.82	14	1149	95	14179	0.015	0.178	0.421
122	GO:0030574	collagen catabolic process	0.023	2.43	19	1908	58	14179	8.62e-05	0.141	1															122	GO:0015701	bicarbonate transport	0.106	2.94	10	1149	42	14179	0.00158	0.88	0.86
123	GO:0007269	neurotransmitter secretion	0.0234	2.03	12	1908	44	14179	1.32e-05	0.969	1															123	GO:0009612	response to mechanical stimulus	0.106	1.26	5	1149	49	14179	0.0499	0.156	0.156
124	GO:0042742	defense response to bacterium	0.0235	1.49	12	1908	60	14179	5.28e-05	0.247	1															124	GO:0042113	B cell activation	0.107	2.57	5	1149	24	14179	0.00788	0.156	1
125	GO:0022617	extracellular matrix disassembly	0.0242	1.74	15	1908	64	14179	0.00335	0.0474	0.0894															125	GO:0008544	epidermis development	0.107	2.15	11	1149	63	14179	0.0019	0.657	0.985
126	GO:0045664	regulation of neuron differentiation	0.0256	1.65	4	1908	18	14179	0.000921	0.0181	1															126	GO:0010107	potassium ion import	0.109	3.76	7	1149	23	14179	0.00229	0.57	1
127	GO:0050911	detection of chemical stimulus involved in sensory perception of smell	0.0261	1.49	5	1908	25	14179	0.24	0.00862	0.00862															127	GO:0030216	keratinocyte differentiation	0.112	1.76	6	1149	42	14179	0.00897	0.156	1
128	GO:0032526	response to retinoic acid	0.0261	1.24	6	1908	36	14179	0.18	0.00996	0.00996															128	GO:0007193	adenylate cyclase-inhibiting G-protein coupled receptor signaling pathway	0.112	2.21	7	1149	39	14179	0.00546	0.294	0.88
129	GO:0006897	endocytosis	0.0276	1	17	1908	126	14179	0.00116	0.135	0.135															129	GO:0010033	response to organic substance	0.113	1.54	3	1149	24	14179	0.00251	0.571	1
130	GO:0048566	embryonic digestive tract development	0.0281	2.79	6	1908	16	14179	0.0571	0.0197	0.0197															130	GO:0007214	gamma-aminobutyric acid signaling pathway	0.114	3.09	4	1149	16	14179	0.0356	0.0414	1
131	GO:0045785	positive regulation of cell adhesion	0.0287	1.17	6	1908	38	14179	4.6e-05	0.515	1															131	GO:0032729	positive regulation of interferon-gamma production	0.116	2.67	8	1149	37	14179	0.00449	0.345	1
132	GO:0009615	response to virus	0.0288	1.55	19	1908	91	14179	6.81e-05	0.352	1															132	GO:0051930	regulation of sensory perception of pain	0.116	1.37	2	1149	18	14179	0.517	0.00655	0.464
133	GO:0006898	receptor-mediated endocytosis	0.0295	2.14	36	1908	125	14179	0.000187	0.137	1															133	GO:0098656	anion transmembrane transport	0.118	1.32	3	1149	28	14179	0.00165	1	1
134	GO:0007613	memory	0.0301	2.06	13	1908	47	14179	0.000977	0.0279	1															134	GO:0048662	negative regulation of smooth muscle cell proliferation	0.119	3.32	7	1149	26	14179	0.0126	0.133	1
135	GO:0055117	regulation of cardiac muscle contraction	0.0302	2.62	6	1908	17	14179	0.000811	0.141	0.241															135	GO:0006936	muscle contraction	0.119	1.36	10	1149	91	14179	0.00754	0.224	1
136	GO:0060326	cell chemotaxis	0.0303	2.07	12	1908	43	14179	5.77e-05	0.484	1															136	GO:0070588	calcium ion transmembrane transport	0.122	2.02	17	1149	104	14179	0.00232	0.877	0.895
137	GO:0006959	humoral immune response	0.0305	2.81	14	1908	37	14179	2.85e-05	1	1															137	GO:0007223	Wnt signaling pathway, calcium modulating pathway	0.122	1.95	6	1149	38	14179	0.0833	0.0218	1
138	GO:0035914	skeletal muscle cell differentiation	0.0318	1.81	10	1908	41	14179	0.0825	0.0197	0.0197															138	GO:0042310	vasoconstriction	0.123	3.29	4	1149	15	14179	0.0117	0.288	0.55
139	GO:0006936	muscle contraction	0.0318	1.22	15	1908	91	14179	5.07e-05	0.636	1															139	GO:0019433	triglyceride catabolic process	0.124	3.43	5	1149	18	14179	0.00229	0.888	0.94
140	GO:0071300	cellular response to retinoic acid	0.0325	1.32	11	1908	62	14179	0.206	0.00768	0.0218															140	GO:0071345	cellular response to cytokine stimulus	0.126	4.7	8	1149	21	14179	0.0025	0.8	1
141	GO:0048593	camera-type eye morphogenesis	0.033	1.86	4	1908	16	14179	0.0293	0.0351	0.0351															141	GO:0008015	blood circulation	0.127	1.76	5	1149	35	14179	0.00318	0.638	1
142	GO:0048565	digestive tract development	0.0331	1.2	5	1908	31	14179	0.00795	0.0676	0.0676															142	GO:0042267	natural killer cell mediated cytotoxicity	0.128	3.09	4	1149	16	14179	0.0206	0.102	1
143	GO:0051607	defense response to virus	0.0344	2.16	38	1908	131	14179	4.15e-05	0.986	0.994															143	GO:0055088	lipid homeostasis	0.136	1.67	5	1149	37	14179	0.0112	0.224	1
144	GO:0007417	central nervous system development	0.0344	1.88	27	1908	107	14179	0.000352	0.116	1															144	GO:0006694	steroid biosynthetic process	0.137	1.54	3	1149	24	14179	0.0126	0.341	0.593
145	GO:0030049	muscle filament sliding	0.0349	2.19	10	1908	34	14179	0.0144	0.0355	0.0832															145	GO:0031295	T cell costimulation	0.137	1.91	9	1149	58	14179	0.0215	0.345	0.345
146	GO:0007601	visual perception	0.036	1.79	39	1908	162	14179	0.000115	0.407	1															146	GO:0048754	branching morphogenesis of an epithelial tube	0.137	1.12	2	1149	22	14179	0.032	0.0811	1
147	GO:0010977	negative regulation of neuron projection development	0.0361	1.49	8	1908	40	14179	0.0414	0.0337	0.0337															147	GO:0048514	blood vessel morphogenesis	0.138	1.54	2	1149	16	14179	0.0165	0.398	0.398
148	GO:0035249	synaptic transmission, glutamatergic	0.037	1.65	4	1908	18	14179	0.000274	0.193	0.958															148	GO:0030449	regulation of complement activation	0.139	3.46	7	1149	25	14179	0.00589	0.562	0.816
149	GO:0043010	camera-type eye development	0.0371	1.27	6	1908	35	14179	0.00198	0.0258	1															149	GO:0045987	positive regulation of smooth muscle contraction	0.141	1.23	2	1149	20	14179	0.59	0.00474	1
150	GO:0001934	positive regulation of protein phosphorylation	0.0372	1.29	20	1908	115	14179	0.00661	0.00948	0.82															150	GO:0006342	chromatin silencing	0.141	2.18	6	1149	34	14179	0.00503	0.643	0.867
151	GO:0018108	peptidyl-tyrosine phosphorylation	0.0375	1.53	29	1908	141	14179	0.000105	0.712	0.7															151	GO:0050679	positive regulation of epithelial cell proliferation	0.141	1.42	6	1149	52	14179	0.0181	0.156	1
152	GO:0007626	locomotory behavior	0.0375	1.77	16	1908	67	14179	9.22e-05	0.739	0.771															152	GO:0001658	branching involved in ureteric bud morphogenesis	0.142	2.35	8	1149	42	14179	0.035	0.287	0.287
153	GO:0051965	positive regulation of synapse assembly	0.0379	2.16	16	1908	55	14179	0.00225	0.0265	0.915															153	GO:0006699	bile acid biosynthetic process	0.147	3.63	5	1149	17	14179	0.00851	0.384	0.978
154	GO:0002062	chondrocyte differentiation	0.0381	1.39	6	1908	32	14179	0.0438	0.0355	0.0355															154	GO:0007602	phototransduction	0.148	2.6	4	1149	19	14179	0.00524	0.613	1
155	GO:0016477	cell migration	0.0388	1.07	23	1908	160	14179	0.000219	0.271	0.983															155	GO:0003333	amino acid transmembrane transport	0.148	2.15	4	1149	23	14179	0.00624	0.517	1
156	GO:0070373	negative regulation of ERK1 and ERK2 cascade	0.0393	1.62	12	1908	55	14179	0.059	0.0321	0.0321															156	GO:0002224	toll-like receptor signaling pathway	0.151	1.03	2	1149	24	14179	0.0972	0.0353	1
157	GO:0007160	cell-matrix adhesion	0.0402	2.06	23	1908	83	14179	0.00427	0.0152	1															157	GO:0007611	learning or memory	0.151	2.13	5	1149	29	14179	0.0147	0.487	0.487
158	GO:0008045	motor neuron axon guidance	0.0409	3.3	8	1908	18	14179	0.00181	0.0611	0.618															158	GO:0035987	endodermal cell differentiation	0.151	2.29	5	1149	27	14179	0.0078	0.445	1
159	GO:0050727	regulation of inflammatory response	0.0414	1.67	11	1908	49	14179	0.000133	0.626	0.853															159	GO:0008285	negative regulation of cell proliferation	0.153	1.16	32	1149	341	14179	0.0431	0.287	0.287
160	GO:0006919	activation of cysteine-type endopeptidase activity involved in apoptotic process	0.0416	1.73	17	1908	73	14179	0.0253	0.0533	0.0533															160	GO:0046697	decidualization	0.153	3.43	5	1149	18	14179	0.0122	0.421	0.694
161	GO:0007281	germ cell development	0.0418	1.71	6	1908	26	14179	0.159	0.000459	1															161	GO:0006836	neurotransmitter transport	0.153	2.47	4	1149	20	14179	0.0126	0.287	1
162	GO:0007411	axon guidance	0.043	1.57	32	1908	151	14179	0.000489	0.255	0.636															162	GO:0002576	platelet degranulation	0.159	1.48	11	1149	92	14179	0.0458	0.154	0.57
163	GO:0001895	retina homeostasis	0.043	1.98	8	1908	30	14179	0.00225	0.0355	1															163	GO:0006958	complement activation, classical pathway	0.163	2.98	7	1149	29	14179	0.00723	0.707	0.845
164	GO:0048791	calcium ion-regulated exocytosis of neurotransmitter	0.0434	3.41	11	1908	24	14179	0.000281	0.539	0.539															164	GO:0006814	sodium ion transport	0.163	1.74	9	1149	64	14179	0.00437	0.993	1
165	GO:0010862	positive regulation of pathway-restricted SMAD protein phosphorylation	0.0436	1.49	8	1908	40	14179	0.162	0.158	0.00325															165	GO:0045879	negative regulation of smoothened signaling pathway	0.165	1.37	2	1149	18	14179	0.308	0.0145	1
166	GO:0070588	calcium ion transmembrane transport	0.0439	2.43	34	1908	104	14179	0.000177	0.555	0.861															166	GO:0019229	regulation of vasoconstriction	0.165	3.09	4	1149	16	14179	0.0157	0.287	1
167	GO:0007409	axonogenesis	0.0449	2.08	21	1908	75	14179	0.000113	0.796	1															167	GO:0008217	regulation of blood pressure	0.167	2.66	11	1149	51	14179	0.0126	0.606	0.606
168	GO:0008202	steroid metabolic process	0.0451	1.86	8	1908	32	14179	0.00441	0.0208	1															168	GO:0007565	female pregnancy	0.167	1.84	10	1149	67	14179	0.0256	0.262	0.694
169	GO:0050830	defense response to Gram-positive bacterium	0.0453	2.21	14	1908	47	14179	0.00271	0.0342	1															169	GO:0090023	positive regulation of neutrophil chemotaxis	0.169	3.25	5	1149	19	14179	0.0155	0.435	0.719
170	GO:0014066	regulation of phosphatidylinositol 3-kinase signaling	0.0454	1.22	11	1908	67	14179	0.0573	0.0176	0.093															170	GO:0046487	glyoxylate metabolic process	0.17	1.61	3	1149	23	14179	0.331	0.0432	0.343
171	GO:0050690	regulation of defense response to virus by virus	0.0456	1.43	5	1908	26	14179	0.294	0.000322	1															171	GO:0045814	negative regulation of gene expression, epigenetic	0.17	2.78	9	1149	40	14179	0.0103	0.534	0.9
172	GO:0006821	chloride transport	0.0477	1.49	6	1908	30	14179	0.00492	0.0221	1															172	GO:0036092	phosphatidylinositol-3-phosphate biosynthetic process	0.172	1.5	5	1149	41	14179	0.236	0.029	0.741
173	GO:0045453	bone resorption	0.0485	2.35	6	1908	19	14179	0.0113	0.01	1															173	GO:1900745	positive regulation of p38MAPK cascade	0.173	4.11	5	1149	15	14179	0.00524	0.994	0.999
174	GO:0045766	positive regulation of angiogenesis	0.0486	1.52	21	1908	103	14179	0.0264	0.00434	1															174	GO:0043029	T cell homeostasis	0.174	2.8	5	1149	22	14179	0.0126	0.415	1
175	GO:0045861	negative regulation of proteolysis	0.0487	1.75	4	1908	17	14179	0.00105	0.109	1															175	GO:0009948	anterior/posterior axis specification	0.175	3.29	4	1149	15	14179	0.0448	0.345	0.345
176	GO:0050714	positive regulation of protein secretion	0.049	1.35	6	1908	33	14179	0.00623	0.0425	0.446															176	GO:0001568	blood vessel development	0.182	1.5	4	1149	33	14179	0.00608	0.998	1
177	GO:0030097	hemopoiesis	0.05	1.34	9	1908	50	14179	0.00088	0.173	0.819															177	GO:0009636	response to toxic substance	0.184	1.48	9	1149	75	14179	0.0436	0.376	0.376
178	GO:0000165	MAPK cascade	0.0502	1.13	36	1908	236	14179	0.00357	0.0355	1															178	GO:0007613	memory	0.185	2.36	9	1149	47	14179	0.00855	0.778	0.944
179	GO:0031668	cellular response to extracellular stimulus	0.0505	1.65	4	1908	18	14179	0.653	0.00205	0.096															179	GO:0042730	fibrinolysis	0.185	2.74	4	1149	18	14179	0.0286	0.223	1
180	GO:0070098	chemokine-mediated signaling pathway	0.0509	1.91	9	1908	35	14179	0.0162	0.0901	0.0901															180	GO:0090102	cochlea development	0.185	3.37	6	1149	22	14179	0.0157	0.406	1
181	GO:0007605	sensory perception of sound	0.051	1.86	30	1908	120	14179	0.000159	0.893	0.935															181	GO:0001523	retinoid metabolic process	0.186	2.15	8	1149	46	14179	0.0138	0.528	0.879
182	GO:0001525	angiogenesis	0.0515	1.55	41	1908	197	14179	0.000137	0.998	1															182	GO:0048468	cell development	0.186	2.7	7	1149	32	14179	0.181	0.0356	1
183	GO:2001240	negative regulation of extrinsic apoptotic signaling pathway in absence of ligand	0.0527	1.44	6	1908	31	14179	0.232	0.0252	0.0252															183	GO:0001702	gastrulation with mouth forming second	0.188	2.31	3	1149	16	14179	0.14	0.0472	1
184	GO:0007631	feeding behavior	0.0538	1.94	6	1908	23	14179	0.054	0.126	0.0229															184	GO:0010628	positive regulation of gene expression	0.188	1.36	24	1149	218	14179	0.281	0.0236	1
185	GO:0007596	blood coagulation	0.057	1.29	27	1908	155	14179	0.00038	0.697	0.697															185	GO:0030206	chondroitin sulfate biosynthetic process	0.189	1.48	3	1149	25	14179	0.331	0.0419	0.491
186	GO:0007156	homophilic cell adhesion via plasma membrane adhesion molecules	0.0573	1.64	32	1908	145	14179	0.00325	0.241	0.241															186	GO:0051966	regulation of synaptic transmission, glutamatergic	0.191	3.37	6	1149	22	14179	0.0078	0.889	1
187	GO:0050729	positive regulation of inflammatory response	0.0579	1.78	11	1908	46	14179	0.000305	0.637	1															187	GO:0071310	cellular response to organic substance	0.193	2.31	3	1149	16	14179	0.00742	0.976	1
188	GO:0001501	skeletal system development	0.0582	1.36	22	1908	120	14179	0.0186	0.0106	1															188	GO:0030099	myeloid cell differentiation	0.196	2.94	5	1149	21	14179	0.0187	0.422	0.948
189	GO:0015701	bicarbonate transport	0.0582	2.65	15	1908	42	14179	0.000224	0.902	0.975															189	GO:0006956	complement activation	0.199	1.76	3	1149	21	14179	0.0266	0.296	1
190	GO:0010043	response to zinc ion	0.0583	1.03	4	1908	29	14179	0.684	0.00816	0.0354															190	GO:1904837	beta-catenin-TCF complex assembly	0.199	1.33	4	1149	37	14179	0.191	0.0414	1
191	GO:0050853	B cell receptor signaling pathway	0.059	2.34	11	1908	35	14179	0.0113	0.135	0.135															191	GO:0045597	positive regulation of cell differentiation	0.202	2.37	5	1149	26	14179	0.0125	0.81	0.814
192	GO:0071560	cellular response to transforming growth factor beta stimulus	0.0595	1.29	8	1908	46	14179	0.542	0.0197	0.0197															192	GO:0030218	erythrocyte differentiation	0.203	1.71	5	1149	36	14179	0.201	0.0414	1
193	GO:0042472	inner ear morphogenesis	0.0596	1.97	13	1908	49	14179	0.000919	0.385	0.599															193	GO:0035249	synaptic transmission, glutamatergic	0.209	1.37	2	1149	18	14179	0.0092	0.992	1
194	GO:0007416	synapse assembly	0.061	1.43	10	1908	52	14179	0.000517	0.439	1															194	GO:0051262	protein tetramerization	0.211	1.5	4	1149	33	14179	0.00938	1	1
195	GO:0010975	regulation of neuron projection development	0.063	1.31	3	1908	17	14179	0.00137	0.183	1															195	GO:0007173	epidermal growth factor receptor signaling pathway	0.214	1.66	7	1149	52	14179	0.257	0.0475	0.807
196	GO:0030168	platelet activation	0.0653	1.52	20	1908	98	14179	0.00188	0.199	0.746															196	GO:0007160	cell-matrix adhesion	0.214	2.23	15	1149	83	14179	0.0247	0.399	1
197	GO:0007204	positive regulation of cytosolic calcium ion concentration	0.0659	2.1	26	1908	92	14179	0.000451	0.637	1															197	GO:0003203	endocardial cushion morphogenesis	0.217	1.54	2	1149	16	14179	0.675	0.0198	0.765
198	GO:0042113	B cell activation	0.0666	2.48	8	1908	24	14179	0.000386	0.764	1															198	GO:0043252	sodium-independent organic anion transport	0.219	2.9	4	1149	17	14179	0.0436	0.492	0.492
199	GO:0070328	triglyceride homeostasis	0.0668	2.83	8	1908	21	14179	0.00248	0.347	0.347															199	GO:0030879	mammary gland development	0.22	1.23	2	1149	20	14179	0.0267	0.398	1
200	GO:0006656	phosphatidylcholine biosynthetic process	0.0685	1.24	4	1908	24	14179	0.294	0.0222	0.0493															200	GO:0007257	activation of JUN kinase activity	0.223	1.19	3	1149	31	14179	0.465	0.0239	1
201	GO:0050715	positive regulation of cytokine secretion	0.0688	2.32	5	1908	16	14179	0.0278	0.108	0.108															201	GO:0001782	B cell homeostasis	0.225	3.29	4	1149	15	14179	0.0286	0.398	1
202	GO:0010508	positive regulation of autophagy	0.0702	1.17	6	1908	38	14179	0.854	0.018	0.0225															202	GO:0032733	positive regulation of interleukin-10 production	0.226	3.43	5	1149	18	14179	0.0404	0.287	1
203	GO:0051966	regulation of synaptic transmission, glutamatergic	0.0704	3.04	9	1908	22	14179	0.000402	0.868	1															203	GO:0001894	tissue homeostasis	0.23	1.54	2	1149	16	14179	0.0428	0.285	1
204	GO:0031295	T cell costimulation	0.0707	2.05	16	1908	58	14179	0.00184	0.439	0.439															204	GO:0007043	cell-cell junction assembly	0.23	1.54	2	1149	16	14179	0.294	0.0414	1
205	GO:0019229	regulation of vasoconstriction	0.0711	2.79	6	1908	16	14179	0.00143	0.251	1															205	GO:0051291	protein heterooligomerization	0.23	1.06	5	1149	58	14179	0.0172	0.708	1
206	GO:0001502	cartilage condensation	0.0711	1.98	4	1908	15	14179	0.132	0.0224	0.121															206	GO:0045664	regulation of neuron differentiation	0.232	1.37	2	1149	18	14179	0.861	0.0145	1
207	GO:0042310	vasoconstriction	0.0712	2.97	6	1908	15	14179	0.000434	0.835	0.996															207	GO:0051591	response to cAMP	0.238	1.85	6	1149	40	14179	0.0189	0.845	0.845
208	GO:0051924	regulation of calcium ion transport	0.0714	2.12	6	1908	21	14179	0.00106	0.343	1															208	GO:0007498	mesoderm development	0.238	2.13	5	1149	29	14179	0.0393	0.345	1
209	GO:0030325	adrenal gland development	0.0722	3.5	8	1908	17	14179	0.00201	0.187	1															209	GO:0042391	regulation of membrane potential	0.239	1.99	10	1149	62	14179	0.043	0.316	1
210	GO:0001822	kidney development	0.0724	1.37	14	1908	76	14179	0.00079	0.481	1															210	GO:0042632	cholesterol homeostasis	0.241	2.14	9	1149	52	14179	0.0227	0.617	1
211	GO:0045596	negative regulation of cell differentiation	0.0734	1.62	5	1908	23	14179	0.00117	0.58	0.58															211	GO:0042104	positive regulation of activated T cell proliferation	0.242	3.09	5	1149	20	14179	0.0193	0.732	1
212	GO:0035987	endodermal cell differentiation	0.0745	1.65	6	1908	27	14179	0.0637	0.00649	1															212	GO:0006865	amino acid transport	0.242	2.7	7	1149	32	14179	0.0142	1	1
213	GO:0070509	calcium ion import	0.0746	2.79	6	1908	16	14179	0.00623	0.0933	0.716															213	GO:0007202	activation of phospholipase C activity	0.243	3.25	5	1149	19	14179	0.0155	0.963	0.963
214	GO:0019233	sensory perception of pain	0.0761	2.18	12	1908	41	14179	0.00262	0.212	0.794															214	GO:0050728	negative regulation of inflammatory response	0.245	1.39	7	1149	62	14179	0.0189	0.875	0.89
215	GO:0001657	ureteric bud development	0.0761	2.34	11	1908	35	14179	0.00206	0.278	0.77															215	GO:0019228	neuronal action potential	0.247	3.22	6	1149	23	14179	0.0158	0.967	0.993
216	GO:0007612	learning	0.0771	1.86	11	1908	44	14179	0.00183	0.251	1															216	GO:0006919	activation of cysteine-type endopeptidase activity involved in apoptotic process	0.25	1.86	11	1149	73	14179	0.0455	0.345	1
217	GO:0006968	cellular defense response	0.0771	2.6	14	1908	40	14179	0.000459	1	1															217	GO:0030111	regulation of Wnt signaling pathway	0.257	1.54	2	1149	16	14179	0.755	0.0396	0.564
218	GO:0061436	establishment of skin barrier	0.078	3.47	7	1908	15	14179	0.00189	0.251	1															218	GO:0043434	response to peptide hormone	0.257	1.58	5	1149	39	14179	0.408	0.0414	1
219	GO:0001666	response to hypoxia	0.0784	1.62	32	1908	147	14179	0.000494	0.976	0.999															219	GO:0007200	phospholipase C-activating G-protein coupled receptor signaling pathway	0.261	1.85	6	1149	40	14179	0.0293	0.718	0.845
220	GO:0050731	positive regulation of peptidyl-tyrosine phosphorylation	0.0785	1.91	17	1908	66	14179	0.00135	0.358	1															220	GO:0090103	cochlea morphogenesis	0.263	1.18	2	1149	21	14179	0.517	0.0353	1
221	GO:0010575	positive regulation of vascular endothelial growth factor production	0.0806	2.08	7	1908	25	14179	0.0422	0.0494	0.251															221	GO:0032735	positive regulation of interleukin-12 production	0.264	3.7	6	1149	20	14179	0.0189	0.978	1
222	GO:0008544	epidermis development	0.0807	2.01	17	1908	63	14179	0.000954	0.551	1															222	GO:0030225	macrophage differentiation	0.267	2.9	4	1149	17	14179	0.0469	0.638	0.638
223	GO:0035235	ionotropic glutamate receptor signaling pathway	0.0826	2.48	8	1908	24	14179	0.0106	0.0534	1															223	GO:0045332	phospholipid translocation	0.277	2.8	5	1149	22	14179	0.0286	0.742	1
224	GO:0032715	negative regulation of interleukin-6 production	0.0834	1.55	5	1908	24	14179	0.0321	0.135	0.135															224	GO:0006810	transport	0.277	1.57	31	1149	243	14179	0.0306	0.694	1
225	GO:0043011	myeloid dendritic cell differentiation	0.0856	2.97	6	1908	15	14179	0.00996	0.251	0.251															225	GO:0051209	release of sequestered calcium ion into cytosol	0.277	2.31	6	1149	32	14179	0.0477	0.447	1
226	GO:0050679	positive regulation of epithelial cell proliferation	0.0858	1.57	11	1908	52	14179	0.00317	0.322	0.619															226	GO:0007189	adenylate cyclase-activating G-protein coupled receptor signaling pathway	0.289	2.39	6	1149	31	14179	0.0337	0.744	0.968
227	GO:0017158	regulation of calcium ion-dependent exocytosis	0.0885	2.74	7	1908	19	14179	0.000786	0.88	1															227	GO:0032148	activation of protein kinase B activity	0.295	1.12	2	1149	22	14179	0.542	0.0472	1
228	GO:0071356	cellular response to tumor necrosis factor	0.0896	1.29	13	1908	75	14179	0.0696	0.0127	0.816															228	GO:0006644	phospholipid metabolic process	0.298	2	6	1149	37	14179	0.0462	0.571	1
229	GO:0016358	dendrite development	0.0901	1.49	5	1908	25	14179	0.00092	0.795	1															229	GO:0032012	regulation of ARF protein signal transduction	0.298	3.09	4	1149	16	14179	0.0356	0.742	1
230	GO:0051603	proteolysis involved in cellular protein catabolic process	0.091	1.43	5	1908	26	14179	1	0.0115	0.0656															230	GO:0061436	establishment of skin barrier	0.303	3.29	4	1149	15	14179	0.0285	0.981	1
231	GO:0007190	activation of adenylate cyclase activity	0.0924	1.33	5	1908	28	14179	0.322	0.0494	0.0494															231	GO:0030183	B cell differentiation	0.31	1.15	4	1149	43	14179	0.0315	0.948	0.998
232	GO:0001656	metanephros development	0.0926	1.49	5	1908	25	14179	0.000795	1	1															232	GO:0051259	protein complex oligomerization	0.315	1.19	5	1149	52	14179	0.0313	1	1
233	GO:0046777	protein autophosphorylation	0.0932	1.32	29	1908	163	14179	0.0447	0.135	0.135															233	GO:0019432	triglyceride biosynthetic process	0.317	2.57	5	1149	24	14179	0.0398	0.801	1
234	GO:0030902	hindbrain development	0.0965	1.86	4	1908	16	14179	0.00205	0.439	1															234	GO:0019221	cytokine-mediated signaling pathway	0.319	1.67	13	1149	96	14179	0.0345	0.944	1
235	GO:0042632	cholesterol homeostasis	0.0995	1.29	9	1908	52	14179	0.26	0.0112	0.336															235	GO:0045907	positive regulation of vasoconstriction	0.332	2.47	5	1149	25	14179	0.0472	0.775	1
236	GO:0050829	defense response to Gram-negative bacterium	0.0997	2.48	10	1908	30	14179	0.00737	0.135	1															236	GO:0001756	somitogenesis	0.337	2.18	6	1149	34	14179	0.0387	0.987	1
237	GO:0030183	B cell differentiation	0.0999	1.73	10	1908	43	14179	0.00397	0.251	1															237	GO:0008037	cell recognition	0.339	2.47	4	1149	20	14179	0.0448	0.869	1
238	GO:0070830	bicellular tight junction assembly	0.101	1.44	6	1908	31	14179	0.426	0.0494	0.0494															238	GO:0006911	phagocytosis, engulfment	0.344	1.37	2	1149	18	14179	0.0411	0.991	1
239	GO:0035924	cellular response to vascular endothelial growth factor stimulus	0.102	1.86	5	1908	20	14179	0.0176	0.0599	1															239	GO:0008209	androgen metabolic process	0.35	4.11	5	1149	15	14179	0.0472	0.928	0.978
240	GO:0007200	phospholipase C-activating G-protein coupled receptor signaling pathway	0.104	1.67	9	1908	40	14179	0.00324	0.352	1
241	GO:0032438	melanosome organization	0.105	1.11	3	1908	20	14179	0.471	0.0494	0.0494
242	GO:0030855	epithelial cell differentiation	0.106	1.18	10	1908	63	14179	0.00229	0.515	1
243	GO:0048863	stem cell differentiation	0.108	1.19	4	1908	25	14179	0.00141	0.886	1
244	GO:0007588	excretion	0.108	1.98	8	1908	30	14179	0.00505	0.251	1
245	GO:0043046	DNA methylation involved in gamete generation	0.109	1.98	4	1908	15	14179	0.132	0.0141	0.686
246	GO:0030890	positive regulation of B cell proliferation	0.109	2.23	9	1908	30	14179	0.0143	0.0901	1
247	GO:0045666	positive regulation of neuron differentiation	0.109	1.24	10	1908	60	14179	0.00296	0.439	1
248	GO:0006730	one-carbon metabolic process	0.109	1.33	5	1908	28	14179	0.28	0.00891	0.524
249	GO:0009967	positive regulation of signal transduction	0.11	1.97	13	1908	49	14179	0.00192	0.685	1
250	GO:0046718	viral entry into host cell	0.11	2.02	19	1908	70	14179	0.00995	0.135	1
251	GO:0050770	regulation of axonogenesis	0.11	2.23	6	1908	20	14179	0.0132	0.101	1
252	GO:0007157	heterophilic cell-cell adhesion via plasma membrane cell adhesion molecules	0.111	2.42	13	1908	40	14179	0.0016	0.847	1
253	GO:0030534	adult behavior	0.111	2.17	7	1908	24	14179	0.00194	0.836	0.836
254	GO:0035666	TRIF-dependent toll-like receptor signaling pathway	0.118	1.1	4	1908	27	14179	0.502	0.00325	1
255	GO:0009790	embryo development	0.12	1.06	5	1908	35	14179	0.0126	0.137	1
256	GO:0016079	synaptic vesicle exocytosis	0.12	1.49	3	1908	15	14179	0.00253	0.685	1
257	GO:0016339	calcium-dependent cell-cell adhesion via plasma membrane cell adhesion molecules	0.12	2.97	10	1908	25	14179	0.00181	0.959	1
258	GO:0086091	regulation of heart rate by cardiac conduction	0.121	2.2	8	1908	27	14179	0.0221	0.0808	1
259	GO:0050796	regulation of insulin secretion	0.122	1.71	12	1908	52	14179	0.208	0.00876	1
260	GO:0034113	heterotypic cell-cell adhesion	0.123	2.74	7	1908	19	14179	0.00768	0.242	1
261	GO:0030334	regulation of cell migration	0.123	1.18	10	1908	63	14179	0.0143	0.165	0.796
262	GO:0060384	innervation	0.124	3.5	8	1908	17	14179	0.00196	0.971	1
263	GO:0008360	regulation of cell shape	0.128	1.07	18	1908	125	14179	0.473	0.0262	0.169
264	GO:0090102	cochlea development	0.128	2.7	8	1908	22	14179	0.00623	0.338	1
265	GO:0002028	regulation of sodium ion transport	0.128	1.86	4	1908	16	14179	0.0352	0.12	0.504
266	GO:0048167	regulation of synaptic plasticity	0.131	2.12	8	1908	28	14179	0.00637	0.35	1
267	GO:0048814	regulation of dendrite morphogenesis	0.131	1.39	3	1908	16	14179	0.0538	0.0417	1
268	GO:0002027	regulation of heart rate	0.131	1.86	6	1908	24	14179	0.0101	0.475	0.471
269	GO:0007218	neuropeptide signaling pathway	0.133	1.73	14	1908	60	14179	0.0258	0.0901	1
270	GO:0045671	negative regulation of osteoclast differentiation	0.136	2.89	7	1908	18	14179	0.00297	0.847	1
271	GO:0017157	regulation of exocytosis	0.136	2.35	6	1908	19	14179	0.00259	0.993	0.983
272	GO:0060173	limb development	0.138	1.11	3	1908	20	14179	0.0665	0.0424	0.923
273	GO:0030324	lung development	0.138	1.22	11	1908	67	14179	0.413	0.00638	1
274	GO:0031589	cell-substrate adhesion	0.139	2.19	5	1908	17	14179	0.00732	0.376	0.978
275	GO:1903779	regulation of cardiac conduction	0.14	2.19	15	1908	51	14179	0.00324	0.847	1
276	GO:0008625	extrinsic apoptotic signaling pathway via death domain receptors	0.14	1.06	5	1908	35	14179	0.0718	0.0384	1
277	GO:0060337	type I interferon signaling pathway	0.141	2.48	17	1908	51	14179	0.00638	0.439	1
278	GO:0043408	regulation of MAPK cascade	0.141	1.68	7	1908	31	14179	0.00496	0.655	0.868
279	GO:0010976	positive regulation of neuron projection development	0.142	1.52	16	1908	78	14179	0.00462	0.731	0.847
280	GO:0009311	oligosaccharide metabolic process	0.143	2.03	6	1908	22	14179	0.082	0.0355	1
281	GO:0016049	cell growth	0.144	1.04	7	1908	50	14179	0.36	0.0166	0.501
282	GO:0048704	embryonic skeletal system morphogenesis	0.148	1.7	8	1908	35	14179	0.0262	0.352	0.352
283	GO:0008104	protein localization	0.15	1.14	8	1908	52	14179	1	0.00335	1
284	GO:0045907	positive regulation of vasoconstriction	0.15	2.08	7	1908	25	14179	0.0422	0.0798	1
285	GO:0098656	anion transmembrane transport	0.151	2.12	8	1908	28	14179	0.0384	0.0901	1
286	GO:0030199	collagen fibril organization	0.151	2.27	11	1908	36	14179	0.00763	0.595	0.766
287	GO:0042475	odontogenesis of dentin-containing tooth	0.152	1.36	9	1908	49	14179	0.177	0.0197	1
288	GO:0007158	neuron cell-cell adhesion	0.153	2.79	6	1908	16	14179	0.0142	0.251	1
289	GO:0030225	macrophage differentiation	0.156	1.75	4	1908	17	14179	0.0267	0.141	1
290	GO:1902041	regulation of extrinsic apoptotic signaling pathway via death domain receptors	0.156	1.39	3	1908	16	14179	0.0461	0.082	1
291	GO:0001935	endothelial cell proliferation	0.156	1.49	3	1908	15	14179	0.0431	0.0887	1
292	GO:0007616	long-term memory	0.157	1.86	6	1908	24	14179	0.0935	0.0412	1
293	GO:0019369	arachidonic acid metabolic process	0.158	1.86	5	1908	20	14179	0.00398	0.987	1
294	GO:0032735	positive regulation of interleukin-12 production	0.158	2.6	7	1908	20	14179	0.00681	0.58	1
295	GO:2000463	positive regulation of excitatory postsynaptic potential	0.159	2.74	7	1908	19	14179	0.0091	0.439	1
296	GO:2000249	regulation of actin cytoskeleton reorganization	0.161	1.86	4	1908	16	14179	0.0335	0.352	0.352
297	GO:0001755	neural crest cell migration	0.162	1.98	12	1908	45	14179	0.0306	0.19	0.727
298	GO:2001238	positive regulation of extrinsic apoptotic signaling pathway	0.162	1.06	3	1908	21	14179	0.115	0.0369	1
299	GO:0042981	regulation of apoptotic process	0.162	1.46	33	1908	168	14179	0.0322	0.149	0.89
300	GO:0071577	zinc ion transmembrane transport	0.162	1.49	3	1908	15	14179	0.278	0.0153	1
301	GO:0021772	olfactory bulb development	0.164	2.19	5	1908	17	14179	0.0404	0.109	1
302	GO:0060999	positive regulation of dendritic spine development	0.166	1.56	4	1908	19	14179	0.00932	0.499	0.98
303	GO:0007585	respiratory gaseous exchange	0.166	1.16	5	1908	32	14179	0.253	0.0181	1
304	GO:0046330	positive regulation of JNK cascade	0.171	1.36	11	1908	60	14179	0.141	0.0355	1
305	GO:0007608	sensory perception of smell	0.171	1.2	5	1908	31	14179	0.143	0.0351	1
306	GO:0043410	positive regulation of MAPK cascade	0.173	2.12	20	1908	70	14179	0.0103	0.543	0.919
307	GO:0031290	retinal ganglion cell axon guidance	0.173	2.48	6	1908	18	14179	0.0428	0.347	0.347
308	GO:0050873	brown fat cell differentiation	0.175	2.08	7	1908	25	14179	0.00737	0.728	1
309	GO:0042730	fibrinolysis	0.175	2.48	6	1908	18	14179	0.0214	0.251	1
310	GO:0021549	cerebellum development	0.177	1.98	8	1908	30	14179	0.00654	0.845	0.997
311	GO:0045494	photoreceptor cell maintenance	0.178	1.92	8	1908	31	14179	0.0483	0.127	0.917
312	GO:0019370	leukotriene biosynthetic process	0.179	2.97	6	1908	15	14179	0.00996	0.58	1
313	GO:0051930	regulation of sensory perception of pain	0.18	2.48	6	1908	18	14179	0.0165	0.351	1
314	GO:0032760	positive regulation of tumor necrosis factor production	0.183	1.44	7	1908	36	14179	0.173	0.0355	1
315	GO:1900006	positive regulation of dendrite development	0.184	1.86	4	1908	16	14179	0.0156	0.398	1
316	GO:0048147	negative regulation of fibroblast proliferation	0.185	1.38	5	1908	27	14179	0.322	0.0197	1
317	GO:0071353	cellular response to interleukin-4	0.187	1.35	4	1908	22	14179	0.294	0.0257	0.866
318	GO:0001942	hair follicle development	0.188	1.65	8	1908	36	14179	0.164	0.0444	0.914
319	GO:0009612	response to mechanical stimulus	0.19	1.21	8	1908	49	14179	0.00683	1	1
320	GO:0007623	circadian rhythm	0.195	1.44	12	1908	62	14179	0.212	0.0348	1
321	GO:0042327	positive regulation of phosphorylation	0.196	1.01	3	1908	22	14179	0.0128	0.669	0.875
322	GO:0050766	positive regulation of phagocytosis	0.197	1.71	6	1908	26	14179	0.0303	0.251	1
323	GO:0038083	peptidyl-tyrosine autophosphorylation	0.197	1.86	10	1908	40	14179	0.0331	0.331	0.701
324	GO:0006869	lipid transport	0.202	1.41	11	1908	58	14179	0.033	0.251	1
325	GO:0048678	response to axon injury	0.203	1.78	6	1908	25	14179	0.0116	0.728	1
326	GO:0006956	complement activation	0.204	1.77	5	1908	21	14179	0.0136	0.789	0.789
327	GO:0051602	response to electrical stimulus	0.204	1.56	4	1908	19	14179	0.255	0.0335	1
328	GO:1903959	regulation of anion transmembrane transport	0.205	1.39	3	1908	16	14179	0.329	0.0321	0.821
329	GO:0048854	brain morphogenesis	0.206	2.19	5	1908	17	14179	0.0219	0.398	1
330	GO:0042476	odontogenesis	0.207	1.65	6	1908	27	14179	0.0355	0.251	1
331	GO:0051591	response to cAMP	0.212	1.49	8	1908	40	14179	0.0322	0.294	1
332	GO:0006027	glycosaminoglycan catabolic process	0.213	1.78	6	1908	25	14179	0.0104	0.926	1
333	GO:0006636	unsaturated fatty acid biosynthetic process	0.214	1.49	3	1908	15	14179	0.0116	0.895	0.945
334	GO:0071222	cellular response to lipopolysaccharide	0.216	1.41	18	1908	95	14179	0.0197	0.515	1
335	GO:0006958	complement activation, classical pathway	0.218	2.05	8	1908	29	14179	0.0335	0.311	1
336	GO:0007422	peripheral nervous system development	0.22	2.83	8	1908	21	14179	0.0237	0.619	0.728
337	GO:0045954	positive regulation of natural killer cell mediated cytotoxicity	0.22	2.48	5	1908	15	14179	0.0412	0.26	1
338	GO:0040007	growth	0.222	1.62	5	1908	23	14179	0.015	0.728	1
339	GO:0045840	positive regulation of mitotic nuclear division	0.224	1.29	4	1908	23	14179	0.617	0.0181	1
340	GO:0032753	positive regulation of interleukin-4 production	0.225	2.32	5	1908	16	14179	0.0259	0.439	1
341	GO:0071456	cellular response to hypoxia	0.233	1.45	17	1908	87	14179	0.0375	0.444	0.764
342	GO:0033137	negative regulation of peptidyl-serine phosphorylation	0.235	1.01	3	1908	22	14179	0.584	0.0222	1
343	GO:1902476	chloride transmembrane transport	0.236	1.71	18	1908	78	14179	0.0141	0.964	0.964
344	GO:0008285	negative regulation of cell proliferation	0.237	1.18	54	1908	341	14179	0.0229	0.584	1
345	GO:0019722	calcium-mediated signaling	0.238	1.35	6	1908	33	14179	0.0162	0.883	0.945
346	GO:0007229	integrin-mediated signaling pathway	0.243	1.86	19	1908	76	14179	0.0147	0.983	0.996
347	GO:0070527	platelet aggregation	0.243	1.14	6	1908	39	14179	0.0281	0.603	0.847
348	GO:0030282	bone mineralization	0.243	2.09	9	1908	32	14179	0.0187	0.772	1
349	GO:0043588	skin development	0.251	1.2	5	1908	31	14179	0.0173	0.914	1
350	GO:0001932	regulation of protein phosphorylation	0.252	1.1	4	1908	27	14179	0.0221	0.728	1
351	GO:0007274	neuromuscular synaptic transmission	0.258	2.58	8	1908	23	14179	0.0176	0.987	0.991
352	GO:0007520	myoblast fusion	0.259	2.32	5	1908	16	14179	0.0274	0.753	0.84
353	GO:0097503	sialylation	0.259	2.62	6	1908	17	14179	0.0259	0.746	0.901
354	GO:0001676	long-chain fatty acid metabolic process	0.26	1.49	4	1908	20	14179	0.0396	0.444	1
355	GO:0051216	cartilage development	0.262	1.54	11	1908	53	14179	0.0334	0.539	1
356	GO:0071347	cellular response to interleukin-1	0.262	2.15	13	1908	45	14179	0.018	0.999	1
357	GO:0045648	positive regulation of erythrocyte differentiation	0.265	1.29	4	1908	23	14179	0.375	0.0494	1
358	GO:0006694	steroid biosynthetic process	0.269	1.24	4	1908	24	14179	0.0362	0.539	1
359	GO:0030593	neutrophil chemotaxis	0.269	2.23	12	1908	40	14179	0.0195	1	1
360	GO:0048538	thymus development	0.27	1.21	6	1908	37	14179	0.405	0.0483	1
361	GO:0048706	embryonic skeletal system development	0.27	1.38	5	1908	27	14179	0.0197	1	1
362	GO:0001658	branching involved in ureteric bud morphogenesis	0.271	2.12	12	1908	42	14179	0.0323	0.619	1
363	GO:0016525	negative regulation of angiogenesis	0.274	1.86	12	1908	48	14179	0.0258	0.795	1
364	GO:0009566	fertilization	0.279	1.92	8	1908	31	14179	0.0217	0.999	1
365	GO:0051491	positive regulation of filopodium assembly	0.279	1.19	4	1908	25	14179	0.44	0.0494	1
366	GO:0042832	defense response to protozoan	0.28	2.48	5	1908	15	14179	0.0412	0.532	1
367	GO:0060349	bone morphogenesis	0.281	1.01	3	1908	22	14179	0.447	0.0494	1
368	GO:0014070	response to organic cyclic compound	0.281	1.49	8	1908	40	14179	0.0223	1	1
369	GO:0003007	heart morphogenesis	0.285	1.24	5	1908	30	14179	0.0337	0.685	1
370	GO:0008306	associative learning	0.289	3.13	8	1908	19	14179	0.0336	0.769	0.936
371	GO:0045665	negative regulation of neuron differentiation	0.29	1.17	8	1908	51	14179	0.0454	0.539	1
372	GO:0070372	regulation of ERK1 and ERK2 cascade	0.292	2.36	7	1908	22	14179	0.0252	0.986	0.998
373	GO:0007259	JAK-STAT cascade	0.293	1.86	7	1908	28	14179	0.0483	0.655	0.796
374	GO:0035019	somatic stem cell population maintenance	0.3	1.36	11	1908	60	14179	0.027	1	1
375	GO:0045216	cell-cell junction organization	0.307	1.75	4	1908	17	14179	0.0408	0.712	1
376	GO:0030878	thyroid gland development	0.315	2.26	7	1908	23	14179	0.0342	0.917	1
377	GO:0045776	negative regulation of blood pressure	0.318	2.58	8	1908	23	14179	0.0321	1	1
378	GO:0044267	cellular protein metabolic process	0.323	1.28	16	1908	93	14179	1	0.0391	0.864
379	GO:0051453	regulation of intracellular pH	0.327	2.7	12	1908	33	14179	0.0438	0.796	1
380	GO:0051894	positive regulation of focal adhesion assembly	0.35	2.23	6	1908	20	14179	0.0428	1	1
381	GO:0007189	adenylate cyclase-activating G-protein coupled receptor signaling pathway	0.354	1.92	8	1908	31	14179	0.0442	1	1
382	GO:0019882	antigen processing and presentation	0.366	2.34	11	1908	35	14179	0.049	1	1
[truncated: 2 more columns]

## Sheet: S3D
Figure S3D Source Data
	External Database	H661-Treat vs H661-Ctrl (moderated t-test)			Normalized Log2 CPM								Expression Z scores
Probe Set ID	GeneSymbol	Fold Change	P-value	FDR	H661-Ctrl-1	H661-Ctrl-2	H661-Ctrl-3	H661-Treat-1	H661-Treat-2	H661-Treat-3	average	STDEV	H661-Ctrl-1	H661-Ctrl-2	H661-Ctrl-3	H661-Treat-1	H661-Treat-2	H661-Treat-3
XAF1	XAF1	4.58565	0.0174713	0.0383091	0.127549	0.651192	0.127549	2.61642	3.73695	1.14429	1.40066	1.47006	-0.866026	-0.509821	-0.866026	0.827014	1.58925	-0.174391
CD86	CD86	7.81809	0.000402117	0.00195443	0.127549	0.127549	0.127549	3.92637	2.98055	2.37617	1.61096	1.69847	-0.873379	-0.873379	-0.873379	1.36324	0.806369	0.450531
BANK1	BANK1	1.35234	0.0241944	0.0501077	5.39935	5.29773	5.06463	5.64324	5.59222	5.83263	5.47163	0.274018	-0.263805	-0.634625	-1.48533	0.626274	0.440071	1.31741
IDO1	IDO1	1.79809	0.0039321	0.0115035	4.10469	4.26735	3.9524	5.18473	4.95486	4.72424	4.53138	0.496063	-0.860158	-0.532242	-1.16715	1.31707	0.853693	0.388788
PDE4B	PDE4B	4.52955	0.00191724	0.00651182	0.127549	0.127549	0.127549	3.11306	1.53898	2.26871	1.21723	1.29349	-0.84244	-0.84244	-0.84244	1.46568	0.248742	0.812901
GBP2	GBP2	3.04967	0.000268289	0.00142502	0.127549	0.127549	0.127549	1.38094	2.09287	1.7348	0.931876	0.909405	-0.884455	-0.884455	-0.884455	0.493802	1.27666	0.882907
SLAMF7	SLAMF7	13.5275	1.08667e-05	0.000147164	0.127549	0.127549	0.127549	3.34541	4.12213	4.18858	2.00646	2.07949	-0.903544	-0.903544	-0.903544	0.643884	1.0174	1.04935
STAT4	STAT4	4.30325	0.00441695	0.012604	0.127549	0.127549	0.127549	3.27204	1.53898	1.8879	1.18026	1.29071	-0.815611	-0.815611	-0.815611	1.62065	0.277922	0.54826
IRF8	IRF8	6.18187	0.0134066	0.0307566	0.127549	2.43154	2.82529	4.68861	4.51436	4.06554	3.10881	1.72126	-1.73203	-0.393475	-0.164722	0.917811	0.816581	0.55583
CDKN1A	CDKN1A	1.78906	3.66899e-07	2.00737e-05	10.7243	10.6973	10.7946	11.5711	11.5965	11.5662	11.1583	0.460864	-0.941812	-1.00042	-0.789171	0.895683	0.950774	0.884949
CSF2RB	CSF2RB	3.43105	0.0242815	0.0502642	0.127549	1.98572	1.80343	3.19474	3.58173	2.47618	2.19489	1.22254	-1.69102	-0.171092	-0.320206	0.817847	1.13439	0.230083
UBA7	UBA7	8.50298	5.3654e-05	0.000441064	2.31657	2.66693	3.15155	5.85904	5.46473	6.07519	4.25567	1.72317	-1.12531	-0.921987	-0.64075	0.930479	0.70165	1.05592
SAMD9	SAMD9	3.15345	0.00904155	0.0224238	0.127549	1.03456	1.53155	2.04136	2.8045	2.81861	1.72635	1.05141	-1.52063	-0.657963	-0.185276	0.299602	1.02542	1.03884
PTGS2	PTGS2	5.5526	0.00182755	0.00627714	1.13986	0.127549	1.53155	3.27204	2.98055	3.96585	2.16957	1.4654	-0.702683	-1.39349	-0.435385	0.752339	0.55342	1.2258
HLA-B	HLA-B	2.23839	6.07157e-08	8.6477e-06	10.0209	10.0021	9.95606	11.1982	11.1277	11.1405	10.5742	0.637497	-0.868065	-0.897444	-0.969701	0.97881	0.868155	0.888243
IRF1	IRF1	1.39963	0.0101203	0.0245371	9.05438	8.89703	8.57434	9.25363	9.33286	9.39441	9.08444	0.310692	-0.0967532	-0.603196	-1.64183	0.544549	0.799552	0.99768
PSMB8	PSMB8	2.45159	0.033128	0.0648367	3.73499	5.28009	4.98493	5.5219	6.00247	6.3568	5.31353	0.917315	-1.72082	-0.0364507	-0.358219	0.227147	0.751041	1.1373
EPSTI1	EPSTI1	1.92543	0.0418034	0.078718	5.93298	5.89268	6.92593	7.54737	6.71926	7.32049	6.72312	0.69157	-1.14254	-1.2008	0.293262	1.19186	-0.00557794	0.863789
LAMP3	LAMP3	3.21385	6.01162e-07	2.5127e-05	7.0885	6.98657	6.94009	8.6877	8.61597	8.76439	7.8472	0.924971	-0.820249	-0.930441	-0.980697	0.908673	0.83113	0.991584
IFI27	IFI27	2.09721	0.000883018	0.00358057	6.34155	6.81956	6.49856	7.82576	7.41106	7.62827	7.08746	0.619231	-1.20458	-0.432637	-0.951012	1.19229	0.522579	0.873354
PSMB9	PSMB9	1.4477	0.00506468	0.0140954	8.43507	8.21428	7.9686	8.76828	8.73435	8.71663	8.47287	0.327914	-0.115275	-0.788578	-1.5378	0.900889	0.797396	0.743366
TAP1	TAP1	1.29954	0.000527205	0.00239371	10.9293	10.8752	11.0748	11.3376	11.3411	11.3345	11.1488	0.217095	-1.01091	-1.26001	-0.340853	0.870023	0.886149	0.855601
HLA-DMA	HLA-DMA	1.20657	0.00783321	0.0200024	9.62268	9.83323	9.71495	10.0566	10.0157	9.91124	9.85907	0.169475	-1.39485	-0.152479	-0.850442	1.16574	0.924235	0.307795
IL7	IL7	1.7258	0.00870344	0.0217644	4.05733	4.67084	4.29846	5.26255	4.99644	5.12942	4.73584	0.480864	-1.41103	-0.135179	-0.909571	1.09535	0.541935	0.818495

## Sheet: S3E
Figure S3E Source Data
Raw data
ETO	ETO dose (μM)	0	0.026244	0.08748	0.2916	0.972	3.24	10.8	36	120	400
siNC	Exp #1	0.329	0.324	0.302	0.295	0.31	0.272	0.212	0.252	0.218	0.154
	Exp #2	0.288	0.33	0.312	0.294	0.329	0.277	0.252	0.22	0.197	0.151
siIFNAR1 #1	Exp #1	0.237	0.264	0.224	0.252	0.239	0.225	0.214	0.185	0.138	0.114
	Exp #2	0.252	0.213	0.238	0.237	0.212	0.203	0.195	0.192	0.162	0.118
siIFNAR1 #2	Exp #1	0.276	0.27	0.251	0.253	0.253	0.2	0.236	0.206	0.168	0.114
	Exp #2	0.225	0.227	0.233	0.226	0.206	0.207	0.186	0.177	0.143	0.104
Relative cell viability	Mean of 0 ETO	0.3085
ETO	ETO dose (μM)	0	0.026244	0.08748	0.2916	0.972	3.24	10.8	36	120	400
siNC	Exp #1	106.645	105.024	97.893	95.624	100.486	88.1686	68.7196	81.6856	70.6645	49.919
	Exp #2	93.3549	106.969	101.135	95.2998	106.645	89.7893	81.6856	71.3128	63.8574	48.9465
siIFNAR1 #1	Exp #1	76.8233	85.5754	72.6094	81.6856	77.4716	72.9335	69.3679	59.9676	44.7326	36.953
	Exp #2	81.6856	69.0438	77.1475	76.8233	68.7196	65.8023	63.2091	62.2366	52.5122	38.2496
siIFNAR1 #2	Exp #1	89.4652	87.5203	81.3614	82.0097	82.0097	64.8298	76.4992	66.7747	54.4571	36.953
	Exp #2	72.9335	73.5818	75.5267	73.2577	66.7747	67.0989	60.2917	57.3744	46.3533	33.7115

## Sheet: S3F
Figure S3F Source Data
Raw data
ETO	ETO dose (μM)	0	0.02624	0.08748	0.2916	0.972	3.24	10.8	36	120	400
Control	Exp #1	0.521	0.573	0.611	0.574	0.546	0.526	0.448	0.359	0.286	0.239
	Exp #2	0.54	0.544	0.565	0.528	0.51	0.508	0.453	0.342	0.289	0.254
	Exp #3	0.516	0.59	0.563	0.526	0.544	0.488	0.452	0.346	0.285	0.253
Anti-IFN-γ	Exp #1	0.559	0.448	0.543	0.488	0.511	0.419	0.302	0.358	0.297	0.257
	Exp #2	0.596	0.497	0.619	0.511	0.393	0.384	0.266	0.322	0.261	0.207
	Exp #3	0.584	0.497	0.462	0.455	0.425	0.454	0.303	0.32	0.265	0.23
Relative cell viability	Mean of 0 ETO	0.525667
	Mean of 0 Anti-IFN-γ	0.579667
ETO	ETO dose (μM)	0	0.02624	0.08748	0.2916	0.972	3.24	10.8	36	120	400
Control	Exp #1	99.1122	109.004	116.233	109.195	103.868	100.063	85.2251	68.2942	54.4071	45.4661
	Exp #2	102.727	103.488	107.483	100.444	97.0197	96.6392	86.1763	65.0602	54.9778	48.3196
	Exp #1	98.1611	112.238	107.102	100.063	103.488	92.8345	85.986	65.8212	54.2169	48.1294
Anti-IFN-γ	Exp #2	96.4347	77.2858	93.6745	84.1863	88.1541	72.2829	52.0989	61.7596	51.2363	44.3358
	Exp #1	102.818	85.7389	106.786	88.1541	67.7976	66.245	45.8884	55.5492	45.0259	35.7102
	Exp #2	100.748	85.7389	79.701	78.4934	73.318	78.3209	52.2714	55.2041	45.7159	39.678
