# Supplementary material for: The oncoprotein BCL6 enables solid tumor cells to evade genotoxic stress
Source: eLife. 2022 May 3;11:e69255. doi: 10.7554/eLife.69255 (PMC9064299; doi:10.7554/eLife.69255)
Supplement: Figure 4—source data 1. [file elife-69255-fig4-data1.xlsx]

## Sheet: 4B
Figure 4B Source Data
Raw data	siNC	ETO	siSTAT1 #1	siSTAT1 #1+ETO	siSTAT1 #2	siSTAT1 #2+ETO
Exp #1	1.245	0.303	0.618	0.709	0.152	0.143
Exp #2	1.234	0.318	0.62	0.729	0.157	0.145
Exp #3	1.233	0.322	0.617	0.741	0.156	0.146
Mean of siNC	1.23733
Relative cell viability	siNC	ETO	siSTAT1 #1	siSTAT1 #1+ETO	siSTAT1 #2	siSTAT1 #2+ETO
Exp #1	100.62	24.4881	49.9461	57.3006	12.2845	11.5571
Exp #2	99.7306	25.7004	50.1078	58.917	12.6886	11.7187
Exp #3	99.6498	26.0237	49.8653	59.8869	12.6078	11.7996
