# Supplementary material for: The oncoprotein BCL6 enables solid tumor cells to evade genotoxic stress
Source: eLife. 2022 May 3;11:e69255. doi: 10.7554/eLife.69255 (PMC9064299; doi:10.7554/eLife.69255)
Supplement: Figure 5—source data 1. [file elife-69255-fig5-data1.xlsx]

## Sheet: 5A
Figure 5A Source Data
	External Database	H661-ETO vs H661-Ctrl (moderated t-test)			Normalized Log2 CPM								Expression Z Scores
Probe Set ID	GeneSymbol	Fold Change	P-value	FDR	H661-Ctrl-1	H661-Ctrl-2	H661-Ctrl-3	H661-ETO-1	H661-ETO-2	H661-ETO-3	Mean	STDEV	H661-Ctrl-1	H661-Ctrl-2	H661-Ctrl-3	H661-ETO-1	H661-ETO-2	H661-ETO-3
PTEN	PTEN	-1.30046	0.000331749	0.00168622	10.0347	9.98317	9.89105	9.64732	9.55432	9.57019	9.78012	0.214954	1.18422	0.944621	0.516073	-0.617829	-1.05046	-0.976628
	External Database	Capan-2-ETO vs Capan-2-Ctrl (moderated t-test)			Normalized Log2 CPM								Expression Z Scores
Probe Set ID	GeneSymbol	Fold Change	P-value	FDR	Capan-2-Ctrl-1	Capan-2-Ctrl-2	Capan-2-Ctrl-3	Capan-2-ETO-1	Capan-2-ETO-2	Capan-2-ETO-3	Mean	STDEV	Capan-2-Ctrl-1	Capan-2-Ctrl-2	Capan-2-Ctrl-3	Capan-2-ETO-1	Capan-2-ETO-2	Capan-2-ETO-3
PTEN	PTEN	-1.59668	2.60952e-05	0.000264351	10.8573	10.9641	10.9372	10.1643	10.3209	10.2482	10.582	0.374708	0.734838	1.01967	0.947892	-1.11475	-0.696827	-0.890816

## Sheet: 5J
Figure 5J Source Data
Raw data	Vector	ETO	PTENOE	ETO+PTENOE
Exp #1	3.241	1.624	2.858	0.592
Exp #2	3.25	1.649	2.853	0.595
Exp #3	3.192	1.621	2.88	0.591
Mean of siNC	3.22767
Relative cell viability	Vector	ETO	PTENOE	ETO+PTENOE
Exp #1	100.413	50.315	88.5469	18.3414
Exp #2	100.692	51.0895	88.392	18.4344
Exp #3	98.895	50.222	89.2285	18.3104

## Sheet: 5K
Figure 5K Source Data
Raw data	siNC	ETO	siPTEN #1	siPTEN #1+ETO	siPTEN #2	siPTEN #2+ETO
Exp #1	0.898	0.505	0.965	0.992	1.114	1.013
Exp #2	0.905	0.505	0.957	0.985	1.119	1.022
Exp #3	0.918	0.502	0.957	0.981	1.114	1.01
Mean of siNC	0.907
Relative cell viability	siNC	ETO	siPTEN #1	siPTEN #1+ETO	siPTEN #2	siPTEN #2+ETO
Exp #1	99.0077	55.6781	106.395	109.372	122.822	111.687
Exp #2	99.7795	55.6781	105.513	108.6	123.374	112.679
Exp #3	101.213	55.3473	105.513	108.159	122.822	111.356
