# Supplementary material for: The oncoprotein BCL6 enables solid tumor cells to evade genotoxic stress
Source: eLife. 2022 May 3;11:e69255. doi: 10.7554/eLife.69255 (PMC9064299; doi:10.7554/eLife.69255)
Supplement: Figure 6—source data 1. [file elife-69255-fig6-data1.xlsx]

## Sheet: 6A
Figure 6A Source Data
	Treatment	Cell lines	Capan-2	PANC28	HT-29	HCT116	H838	HCC827																	PC9	H522
ETO IC50 (μM)	Control	Exp #1	138.3	16.99	18.41	25.31	82.29	28.4																	16.12	0.6323
		Exp #2	73.17	26.37	20.53	21.86	70.63	25.73																	25.22	0.842
	BI3802	Exp #1	51	2.235	2.475	1.176	27.38	5.591																	7.438	0.2027
		Exp #2	63	5.816	0.6219	1.161	16.66	6.82																	12.11	0.2074
	Compound 7	Exp #1	74.93	8.572	9.047	16.44	111.5	4.985																	19.3	0.1365
		Exp #2	41.72	36.34	3.065	11.82	40.68	9.825																	22.07	0.154
Fold change in ETO IC50 between Control-treated and BI3802 or Compound 7 treated lines (log*10)
	Treatment	Cell lines	Capan-2	PANC28	HT-29	HCT116	H838	HCC827
ETO IC50 (μM)	BI3802	Exp #1	-4.33252	-8.80916	-8.71479	-13.3288	-4.77914	-7.05829
		Exp #2	-0.649925	-6.56486	-15.1867	-12.7482	-6.27314	-5.76655
	Compound 7	Exp #1	-2.66166	-2.97111	-3.08549	-1.8739	1.31928	-7.55653
		Exp #2	-2.43989	1.39275	-8.25958	-2.67033	-2.39608	-4.18107

## Sheet: 6B
Figure 6B Source Data
PANC28 Raw data							ETO+BI3802
ETO dose (μM)	30	15	7.5	3.75	1.875	0.9375	30:30	15:15:00	7.5:7.5	Control		Mean of Control	Relative cell growth inhibition										Mean of relative cell growth inhibition
0.0533	0.0527	0.0528	0.055	0.0601	0.058	0.0558	0.0531	0.0554	0.0557	0.055	0.0543																						ETO dose	BI3802 Dose	Fa	CI	ED50	0.35858
0.0464	0.1532	0.254	0.2743	0.3245	0.3273	0.3862	0.0763	0.101	0.1352	0.3822	0.0449	0.410033	0.626372	0.380538	0.33103	0.208601	0.201772	0.0581254	0.813918	0.753679	0.670271		0.642712	0.410454	0.325502	0.23998	0.203398	0.0582066	0.809609	0.73807	0.661003		0.9375	0.9375	0.380782	0.176	ED75	0.7498
0.06	0.1428	0.2251	0.2802	0.2955	0.3302	0.3923	0.0801	0.0986	0.1417	0.395	0.0458		0.651736	0.45102	0.316641	0.279327	0.1947	0.0432485	0.80465	0.759532	0.654418												1.875	1.875	0.366759	0.374	ED90	1.67085
0.0463	0.1435	0.2461	0.2752	0.3149	0.3224	0.38	0.0778	0.1226	0.1401	0.425	0.0475		0.650028	0.399805	0.328835	0.232014	0.213722	0.0732461	0.810259	0.701	0.65832												3.75	3.75	0.484188	0.466
0.0475	0.1269	0.1827	0.255	0.3651	0.3915	0.3704	0.2109	0.2455	0.2519	0.4069	0.0488		0.690513	0.554426	0.378099	0.109585	0.0451996	0.0966588	0.485652	0.401268	0.38566		0.647834	0.477847	0.362613	0.112145	0.00934883	0.0438582	0.484188	0.366759	0.380782		7.5	7.5	0.661003	0.468
0.047	0.1619	0.2455	0.2677	0.363	0.4209	0.4137	0.2121	0.2738	0.2559	0.4167	0.0464		0.605154	0.401268	0.347126	0.114706	-0.0265019	-0.00894236	0.482725	0.332249	0.375904												15	15	0.73807	0.669
0.0445	0.1444	0.2141	0.26135	0.36405	0.4062	0.39205	0.2115	0.25965	0.2539	0.4065	0.041		0.647834	0.477847	0.362613	0.112145	0.00934883	0.0438582	0.484188	0.366759	0.380782												30	30	0.809609	0.926
0.047	0.047	0.0468	0.0469	0.0507	0.0466	0.0491	0.0461	0.0464	0.0456	0.0487	0.046
BI3802 Dose (μM)	30	15	7.5	3.75	1.875	0.9375	3.75:3.75	1.875:1.875	0.9375:0.9375
AsPC-1 Raw data							ETO+BI3802
ETO dose (μM)	90	45	22.5	11.25	5.625	2.8125	90:25	45:12.5	22.5:6.25	Control		Mean of Control	Relative cell growth inhibition										Mean of relative cell growth inhibition
0.0473	0.0532	0.0534	0.0548	0.0576	0.0591	0.0557	0.0549	0.0452	0.0384	0.0345	0.0515																						ETO dose	BI3802 Dose	Fa	CI	ED50	0.67926
0.0443	0.1698	0.2028	0.2528	0.288	0.327	0.3623	0.1252	0.1584	0.2122	0.3979	0.0463	0.4173	0.593098	0.514019	0.394201	0.309849	0.216391	0.1318	0.699976	0.620417	0.491493		0.589903	0.508747	0.370637	0.292435	0.1842	0.114786	0.666347	0.614506	0.457545		2.8125	0.78125	0.180304	0.599	ED75	0.68624
0.0495	0.1656	0.2	0.2653	0.3144	0.3513	0.3598	0.1385	0.1505	0.2438	0.383	0.0488		0.603163	0.520728	0.364246	0.246585	0.15816	0.137791	0.668104	0.639348	0.415768												5.625	1.5625	0.212412	0.893	ED90	0.69382
0.0459	0.178	0.2122	0.2698	0.2834	0.343	0.3861	0.154	0.1737	0.2231	0.43785	0.0363		0.573448	0.491493	0.353463	0.320872	0.178049	0.0747664	0.630961	0.583753	0.465373												11.25	3.125	0.367437	0.591
0.0491	0.3266	0.3332	0.344	0.3368	0.3772	0.3826	0.2755	0.3372	0.3275	0.4254	0.0527		0.21735	0.201534	0.175653	0.192907	0.0960939	0.0831536	0.339803	0.191948	0.215193		0.201773	0.206686	0.178169	0.138629	0.0769231	0.0209681	0.367362	0.212317	0.180206		22.5	6.25	0.45761	0.691
0.0493	0.3396	0.3289	0.3419	0.3821	0.3932	0.4345	0.2525	0.3202	0.3567	0.4176	0.0463		0.186197	0.211838	0.180685	0.0843518	0.0577522	-0.0412173	0.39492	0.232686	0.145219												45	12.5	0.614552	0.552
0.0252	0.3331	0.33105	0.34295	0.35945	0.3852	0.40855	0.264	0.3287	0.3421	0.4089	0.0482		0.201773	0.206686	0.178169	0.138629	0.0769231	0.0209681	0.367362	0.212317	0.180206												90	25	0.666387	0.798
0.0342	0.0446	0.0367	0.0417	0.0363	0.0503	0.0466	0.0371	0.0349	0.0457	0.0347	0.0442
BI3802 Dose (μM)	25	12.5	6.25	3.125	1.5625	0.78125	11.25:3.125	5.625:1.5625	2.8125:0.78125
H838 Raw data							ETO+BI3802
ETO dose (μM)	100	50	25	12.5	6.25	3.125	100:30	50:15	25:7.5	Control		Mean of Control	Relative cell growth inhibition										Mean of relative cell growth inhibition
0.0517	0.0537	0.0525	0.0528	0.0544	0.0554	0.0534	0.0541	0.054	0.0521	0.0516	0.0532																						ETO dose	BI3802 Dose	Fa	CI	ED50	0.52976
0.0444	0.0947	0.0896	0.124	0.1646	0.1575	0.142	0.0856	0.076	0.0738	0.132	0.0437	0.1778	0.467379	0.496063	0.302587	0.0742407	0.114173	0.20135	0.51856	0.572553	0.584927		0.461567	0.493063	0.284964	0.113611	0.248969	0.0896138	0.538058	0.52006	0.514061		3.125	0.9375	0.0725534	1.989	ED75	0.34139
0.0445	0.0973	0.0882	0.1261	0.1659	0.1227	0.192	0.0774	0.0856	0.0882	0.1598	0.0453		0.452756	0.503937	0.290776	0.0669291	0.309899	-0.079865	0.564679	0.51856	0.503937												6.25	1.875	0.114173	1.804	ED90	0.22068
0.0466	0.0952	0.0926	0.1313	0.1423	0.1204	0.1516	0.0834	0.0944	0.0972	0.1667	0.0446		0.464567	0.47919	0.26153	0.199663	0.322835	0.147357	0.530934	0.469066	0.453318												12.5	3.75	0.34177	0.398
0.0453	0.1158	0.1332	0.1228	0.1435	0.1581	0.1787	0.1123	0.1596	0.167	0.1802	0.0466		0.348706	0.250844	0.309336	0.192913	0.110799	-0.00506187	0.368391	0.102362	0.0607424		0.329209	0.214661	0.208849	0.167604	0.142107	0.024372	0.34177	0.114173	0.0725534		25	7.5	0.514061	0.259
0.0436	0.116	0.1389	0.1578	0.1507	0.1561	0.1761	0.1079	0.1567	0.1623	0.1789	0.0449		0.347582	0.218785	0.112486	0.152418	0.122047	0.0095613	0.393138	0.118673	0.0871766												50	15	0.52006	0.498
0.0386	0.126	0.1468	0.1414	0.1498	0.1434	0.1656	0.1309	0.1562	0.1654	0.1743	0.0387		0.291339	0.174353	0.204724	0.15748	0.193476	0.0686164	0.26378	0.121485	0.0697413												100	30	0.538058	0.889
0.0479	0.0414	0.0432	0.0428	0.0444	0.0445	0.0465	0.0446	0.0548	0.0464	0.0467	0.0447
BI3802 Dose (μM)	30	15	7.5	3.75	1.875	0.9375	12.5:3.75	6.25:1.875	3.125:0.9375
OVCAR8 Raw data							ETO+BI3802
ETO dose (μM)	40	20	10	5	2.5	1.25	40:30	20:15	10:7.5	Control		Mean of Control	Relative cell growth inhibition										Mean of relative cell growth inhibition
-0.0701	-0.0739	-0.0714	-0.0743	-0.0857	-0.0751	-0.0722	-0.0742	-0.0685	-0.0637	-0.064	-0.0683																						ETO dose	BI3802 Dose	Fa	CI	ED50	0.74274
0.0482	0.453	0.432	0.486	0.532	0.596	0.724	0.264	0.397	0.44	0.911	0.0457	0.92	0.507609	0.530435	0.471739	0.421739	0.352174	0.213043	0.713043	0.568478	0.521739		0.57029	0.521014	0.442391	0.403261	0.270652	0.203986	0.689855	0.568116	0.529348		1.25	0.9375	0.193841	1.501	ED75	0.51711
0.0449	0.388	0.406	0.502	0.55	0.645	0.706	0.29	0.364	0.43	0.946	0.0446		0.578261	0.558696	0.454348	0.402174	0.298913	0.232609	0.684783	0.604348	0.532609												2.5	1.875	0.273913	1.203	ED90	0.41697
0.0448	0.345	0.484	0.551	0.565	0.772	0.767	0.302	0.431	0.429	0.959	0.0445		0.625	0.473913	0.401087	0.38587	0.16087	0.166304	0.671739	0.531522	0.533696												5	3.75	0.402899	0.749
0.0206	0.56	0.713	0.74	0.796	0.952	0.888	0.529	0.689	0.694	0.99	0.0245		0.391304	0.225	0.195652	0.134783	-0.0347826	0.0347826	0.425	0.251087	0.245652		0.393841	0.241304	0.181522	0.0963768	0.0507246	0.0550725	0.402899	0.273913	0.193841		10	7.5	0.529348	0.548
0.0468	0.555	0.725	0.79	0.848	0.816	0.85	0.538	0.641	0.73	0.909	0.0466		0.396739	0.211957	0.141304	0.0782609	0.113043	0.076087	0.415217	0.303261	0.206522												20	15	0.568116	0.808
0.1258	0.558	0.656	0.729	0.85	0.852	0.87	0.581	0.674	0.801	0.861	0.1038		0.393478	0.286957	0.207609	0.076087	0.073913	0.0543478	0.368478	0.267391	0.129348												40	30	0.689855	0.593
0.0488	0.0475	0.0834	0.0476	0.048	0.0476	0.0489	0.0484	0.0482	0.0478	0.0478	0.0514
BI3802 Dose (μM)	30	15	7.5	3.75	1.875	0.9375	5:3.75	2.5:1.875	1.25:0.9375
HCT116 Raw data							ETO+BI3802
ETO dose (μM)	35	17.5	8.75	4.375	2.1875	1.09375	35:30	17.5:15	8.75:7.5	Control		Mean of Control	Relative cell growth inhibition										Mean of relative cell growth inhibition
0.0523	0.0522	0.0523	0.0533	0.0544	0.0537	0.0537	0.055	0.056	0.0542	0.0524	0.0541																						ETO dose	BI3802 Dose	Fa	CI	ED50	0.59614
0.0447	0.391	0.443	0.536	0.517	0.673	0.643	0.222	0.3	0.354	0.821	0.0455	0.864667	0.547803	0.487664	0.380108	0.402082	0.221665	0.256361	0.743254	0.653045	0.590594		0.583269	0.534695	0.420586	0.402082	0.226291	0.269082	0.747109	0.661912	0.548574		1.09375	0.9375	0.257517	0.903	ED75	0.55061
0.0445	0.321	0.399	0.48	0.506	0.585	0.623	0.199	0.304	0.406	0.826	0.0689		0.628759	0.538551	0.444873	0.414803	0.323439	0.279491	0.769854	0.648419	0.530455												2.1875	1.875	0.367772	0.634	ED90	0.66657
0.0457	0.369	0.365	0.487	0.528	0.749	0.63	0.235	0.273	0.411	0.857	0.0455		0.573246	0.577872	0.436777	0.38936	0.13377	0.271396	0.728219	0.684271	0.524672												4.375	3.75	0.468003	0.57
0.0463	0.381	0.486	0.59	0.62	0.846	0.791	0.455	0.519	0.697	0.878	0.0498		0.559368	0.437934	0.317656	0.282961	0.0215883	0.0851966	0.473786	0.399769	0.193909		0.519275	0.405937	0.32421	0.297224	0.0605243	0.0809561	0.468003	0.367772	0.257517		8.75	7.5	0.548574	0.626
0.0441	0.445	0.529	0.575	0.578	0.765	0.813	0.433	0.613	0.647	0.907	0.0452		0.485351	0.388204	0.335004	0.331534	0.115266	0.0597533	0.499229	0.291056	0.251735												17.5	15	0.661912	0.542
0.0416	0.421	0.526	0.588	0.625	0.826	0.78	0.492	0.508	0.582	0.809	0.0388		0.513107	0.391673	0.319969	0.277178	0.0447186	0.0979183	0.430995	0.41249	0.326908												35	30	0.747109	0.552
0.0449	0.0443	0.0452	0.0511	0.0472	0.0453	0.0461	0.0455	0.0463	0.0462	0.046	0.0514
BI3802 Dose (μM)	30	15	7.5	3.75	1.875	0.9375	4.375:3.75	2.1875:1.875	1.09375:0.9375
Capan-2 Raw data							ETO+Compound 7
ETO dose (μM)	100	50	25	12.5	6.25	3.125	100:60	50:30	25:15	Control		Mean of Control	Relative cell growth inhibition										Mean of relative cell growth inhibition
0.0534	0.007	0.0459	0.0556	0.0576	0.0639	0.0577	0.0557	0.0523	0.0555	0.0551	0.0584																						ETO dose	Compound 7 Dose	Fa	CI	ED50	0.88574
0.0395	0.2904	0.4006	0.5163	0.5642	0.6616	0.6028	0.172	0.2559	0.4149	0.7346	0.0444	0.8788	0.669549	0.544151	0.412494	0.357988	0.247155	0.314065	0.804279	0.708807	0.527879		0.651988	0.535503	0.386322	0.339288	0.272758	0.262327	0.78831	0.672053	0.522607		3.125	1.875	0.171939	2.237	ED75	0.53622
0.0472	0.3128	0.4008	0.5506	0.5763	0.6201	0.6615	0.1987	0.2699	0.4123	0.8022	0.0461		0.64406	0.543924	0.373464	0.344219	0.294379	0.247269	0.773896	0.692877	0.530838												6.25	3.75	0.243173	1.942	ED90	0.40082
0.0482	0.3143	0.4232	0.551	0.6014	0.6356	0.6805	0.1874	0.3388	0.4314	0.7492	0.0456		0.642353	0.518434	0.373009	0.315658	0.276741	0.225649	0.786755	0.614474	0.509103												12.5	7.5	0.348145	1.509
0.0462	0.3859	0.4713	0.5503	0.7571	0.7772	0.7796	0.5693	0.6434	0.7215	0.8022	0.0449		0.560878	0.463701	0.373805	0.138484	0.115612	0.112881	0.352185	0.267865	0.178994		0.567877	0.481736	0.312301	0.131031	0.107362	0.0828971	0.348145	0.243173	0.171939		25	15	0.522607	0.846
0.0478	0.3736	0.4396	0.6584	0.7702	0.7917	0.8323	0.5764	0.6868	0.7339	0.9171	0.0461		0.574875	0.499772	0.250797	0.123578	0.0991124	0.0529131	0.344106	0.21848	0.164884												50	30	0.672053	0.599
0.0461	0.37975	0.45545	0.60435	0.76365	0.78445	0.80595	0.57285	0.6651	0.7277	0.9171	0.042		0.567877	0.481736	0.312301	0.131031	0.107362	0.0828971	0.348145	0.243173	0.171939												100	60	0.78831	0.477
0.0446	0.0473	0.0452	0.0455	0.0466	0.0463	0.046	0.0463	0.0464	0.0472	0.0352	0.0468
Compound 7 Dose (μM)	60	30	15	7.5	3.75	1.875	12.5:7.5	6.25:3.75	3.125:1.875
PANC28 Raw data							ETO+Compound 7
ETO dose (μM)	30	15	7.5	3.75	1.875	0.9375	30:60	15:30	7.5:15	Control		Mean of Control	Relative cell growth inhibition										Mean of relative cell growth inhibition
0.0525	0.0516	0.0532	0.0548	0.0568	0.0556	0.0548	0.055	0.0558	0.0547	0.0547	0.0539																						ETO dose	Compound 7 Dose	Fa	CI	ED50	0.26095
0.0444	0.2376	0.37	0.4151	0.4153	0.4105	0.4844	0.1258	0.1514	0.2978	0.5422	0.0442	0.6072	0.608696	0.390646	0.31637	0.316041	0.323946	0.20224	0.792819	0.750659	0.509552		0.637462	0.495663	0.358366	0.355182	0.357543	0.248079	0.809069	0.774484	0.548474		0.9375	1.875	0.400362	0.271	ED75	0.24763
0.0446	0.2224	0.3399	0.3876	0.3918	0.3725	0.4829	0.0948	0.1302	0.2703	0.5122	0.0455		0.633729	0.440217	0.36166	0.354743	0.386528	0.20471	0.843874	0.785573	0.554842												1.875	3.75	0.570158	0.127	ED90	0.27725
0.0447	0.2004	0.2088	0.3661	0.3675	0.3873	0.4024	0.1272	0.1292	0.2544	0.6397	0.05		0.66996	0.656126	0.397069	0.394763	0.362154	0.337286	0.790514	0.78722	0.581028												3.75	7.5	0.50387	0.444
0.0455	0.2186	0.3232	0.4426	0.4474	0.4922	0.4828	0.3007	0.2614	0.3725	0.5422	0.0551		0.639987	0.467721	0.27108	0.263175	0.189394	0.204875	0.504776	0.569499	0.386528		0.630435	0.469615	0.24333	0.230155	0.191123	0.165514	0.50387	0.570158	0.400362		7.5	15	0.548474	0.611
0.0445	0.2302	0.3209	0.4763	0.4875	0.4901	0.5306	0.3018	0.2606	0.3557	0.6397	0.0475		0.620883	0.471509	0.21558	0.197134	0.192852	0.126153	0.502964	0.570817	0.414196												15	30	0.774484	0.153
0.0461	0.2244	0.32205	0.45945	0.46745	0.49115	0.5067	0.30125	0.261	0.3641	0.6397	0.0412		0.630435	0.469615	0.24333	0.230155	0.191123	0.165514	0.50387	0.570158	0.400362												30	60	0.809069	0.205
0.0452	0.0449	0.0451	0.0504	0.0457	0.0451	0.0467	0.0452	0.0451	0.051	0.0459	0.0477
Compound 7 Dose (μM)	60	30	15	7.5	3.75	1.875	3.75:7.5	1.875:3.75	0.9375:1.875
AsPC-1 Raw data							ETO+Compound 7
ETO dose (μM)	90	45	22.5	11.25	5.625	2.8125	90:60	45:30	22.5:15	Control		Mean of Control	Relative cell growth inhibition										Mean of relative cell growth inhibition
0.049	0.0434	0.0531	0.0551	0.0572	0.0573	0.0529	0.0546	0.0561	0.0544	0.0534	0.0589																						ETO dose	Compound 7 Dose	Fa	CI	ED50	0.54248
0.0453	0.198	0.2526	0.2885	0.3093	0.3473	0.4046	0.164	0.1863	0.2266	0.4419	0.0492	0.465967	0.575077	0.457901	0.380857	0.336219	0.254668	0.131698	0.648043	0.600186	0.513699		0.54353	0.472351	0.385292	0.336576	0.222691	0.168753	0.641176	0.591745	0.507833		2.8125	1.875	0.254024	0.489	ED75	0.7393
0.0483	0.2272	0.2244	0.2744	0.3255	0.3536	0.3814	0.1744	0.1938	0.2309	0.48	0.0447		0.512411	0.51842	0.411117	0.301452	0.241147	0.181487	0.625724	0.58409	0.504471												5.625	3.75	0.341906	0.446	ED90	1.07209
0.0338	0.2129	0.2606	0.2964	0.2926	0.3857	0.376	0.1632	0.1906	0.2305	0.4697	0.049		0.5431	0.440733	0.363903	0.372058	0.172258	0.193075	0.64976	0.590958	0.505329												11.25	7.5	0.430431	0.448
0.0067	0.3407	0.34	0.2692	0.36	0.4344	0.412	0.2323	0.306	0.3461	0.4697	0.052		0.268832	0.270334	0.422276	0.227413	0.0677445	0.115817	0.501466	0.343301	0.257243		0.315938	0.267544	0.385471	0.168825	0.0601259	0.0576579	0.430431	0.341906	0.254024		22.5	15	0.507833	0.507
0.0458	0.2968	0.3426	0.3035	0.4146	0.4415	0.4662	0.2985	0.3073	0.3491	0.4585	0.0464		0.363045	0.264754	0.348666	0.110237	0.0525073	-0.000500751	0.359396	0.340511	0.250805												45	30	0.591745	0.548
0.0451	0.31875	0.3413	0.28635	0.3873	0.43795	0.4391	0.2654	0.30665	0.3476	0.4697	0.0421		0.315938	0.267544	0.385471	0.168825	0.0601259	0.0576579	0.430431	0.341906	0.254024												90	60	0.641176	0.752
0.0476	0.0427	0.0459	0.0321	0.03	0.0519	0.0516	0.0478	0.0476	0.0407	0.0476	0.0471
Compound 7 Dose (μM)	60	30	15	7.5	3.75	1.875	11.25:7.5	5.625:3.75	2.8125:1.875
H838 Raw data							ETO+Compound 7
ETO dose (μM)	100	50	25	12.5	6.25	3.125	100:60	50:30	25:15	Control		Mean of Control	Relative cell growth inhibition										Mean of relative cell growth inhibition
0.0526	0.0523	0.0516	0.0533	0.0542	0.053	0.0529	0.0538	0.0545	0.052	0.0525	0.0536																						ETO dose	Compound 7 Dose	Fa	CI	ED50	1.49931
0.0447	0.0713	0.079	0.0879	0.1039	0.1313	0.117	0.0865	0.0858	0.1047	0.1623	0.0437	0.155633	0.541872	0.492397	0.435211	0.332405	0.15635	0.248233	0.444206	0.448704	0.327265		0.540587	0.503962	0.427501	0.264296	0.212037	0.195545	0.479118	0.422789	0.344185		3.125	1.875	0.0644678	40.774	ED75	0.80584
0.0449	0.0717	0.0738	0.0936	0.1278	0.1286	0.1189	0.0789	0.0958	0.099	0.1557	0.0446		0.539302	0.525809	0.398586	0.178839	0.173699	0.236025	0.493039	0.384451	0.363889												6.25	3.75	0.191476	3.319	ED90	0.47316
0.0452	0.0715	0.0788	0.0858	0.1118	0.108	0.1397	0.0778	0.0879	0.1025	0.1338	0.0448		0.540587	0.493682	0.448704	0.281645	0.306061	0.102377	0.500107	0.435211	0.341401												12.5	7.5	0.346113	1.011
0.0457	0.0942	0.0979	0.1066	0.1119	0.1086	0.1355	0.1136	0.1298	0.142	0.1567	0.0473		0.394731	0.370957	0.315057	0.281002	0.302206	0.129364	0.270079	0.165988	0.0875991		0.4003	0.346327	0.319769	0.303705	0.255301	0.144999	0.346113	0.191476	0.0644678		25	15	0.344185	2.06
0.0476	0.0978	0.1087	0.1039	0.1022	0.1268	0.1313	0.09	0.1441	0.1556	0.1597	0.0451		0.3716	0.301564	0.332405	0.343328	0.185265	0.15635	0.421718	0.0741058	0.000214179												50	30	0.422789	1.973
0.0461	0.088	0.0986	0.1071	0.111	0.1123	0.1324	0.1017	0.1036	0.1392	0.1505	0.0378		0.434568	0.36646	0.311844	0.286785	0.278432	0.149283	0.346541	0.334333	0.10559												100	60	0.479118	2.416
0.0457	0.0447	0.0443	0.0431	0.0472	0.0461	0.0449	0.0445	0.0497	0.0454	0.0463	0.0453
Compound 7 Dose (μM)	60	30	15	7.5	3.75	1.875	12.5:7.5	6.25:3.75	3.125:1.875
HCT116 Raw data							ETO+Compound 7
ETO dose (μM)	35	17.5	8.75	4.375	2.1875	1.09375	35:60	17.5:30	8.75:15	Control		Mean of Control	Relative cell growth inhibition										Mean of relative cell growth inhibition
0.0536	0.0553	0.0557	0.0552	0.0571	0.0538	0.0535	0.0551	0.055	0.0565	0.0575	0.054																						ETO dose	Compound 7 Dose	Fa	CI	ED50	0.60413
0.045	0.361	0.419	0.481	0.562	0.566	0.577	0.289	0.318	0.406	0.511	0.0463	0.764667	0.527899	0.452049	0.370968	0.265039	0.259808	0.245423	0.622058	0.584133	0.46905		0.489102	0.434612	0.384045	0.290759	0.238012	0.204882	0.637751	0.562337	0.467742		1.09375	1.875	0.259808	0.548	ED75	1.10684
0.0456	0.385	0.438	0.477	0.511	0.564	0.613	0.261	0.331	0.404	0.792	0.0463		0.496513	0.427201	0.376199	0.331735	0.262424	0.198344	0.658675	0.567132	0.471665												2.1875	3.75	0.325196	0.552	ED90	2.71855
0.0454	0.426	0.44	0.455	0.554	0.618	0.634	0.281	0.355	0.411	0.77	0.0474		0.442895	0.424586	0.404969	0.275501	0.191805	0.170881	0.63252	0.535745	0.462511												4.375	7.5	0.434176	0.43
0.0465	0.372	0.43	0.606	0.725	0.703	0.709	0.42	0.536	0.572	0.792	0.0502		0.513514	0.437663	0.207498	0.0518745	0.0806452	0.0727986	0.450741	0.299041	0.251962		0.535745	0.441587	0.220139	0.129468	0.097646	0.0767219	0.434176	0.325196	0.259808		8.75	15	0.467742	0.664
0.0507	0.35	0.413	0.616	0.61	0.682	0.733	0.448	0.499	0.572	0.77	0.0455		0.542284	0.459895	0.19442	0.202267	0.108108	0.0414124	0.414124	0.347428	0.251962												17.5	30	0.562337	0.669
0.0452	0.343	0.438	0.567	0.662	0.685	0.676	0.43	0.513	0.554	0.732	0.0426		0.551439	0.427201	0.2585	0.134263	0.104185	0.115955	0.437663	0.329119	0.275501												35	60	0.637751	0.791
0.0477	0.0685	0.0467	0.0453	0.0455	0.0455	0.0488	0.0484	0.0464	0.047	0.0473	0.0515
Compound 7 Dose (μM)	60	30	15	7.5	3.75	1.875	4.375:7.5	2.1875:3.75	1.09375:1.875

## Sheet: 6C
Figure 6C Source Data
AsPC-1	raw data	ETO (μM)					AsPC-1	growth inhibition	ETO (μM)					AsPC-1	Mean growth inhibition	ETO (μM)
		0	0.1	0.2	0.4	Control mean			0	0.1	0.2	0.4				0	0.1	0.2	0.4
BI3802 (μM)	0	3.2452	2.4507	1.9029	0.4501	3.26723	BI3802 (μM)	0	0.674373	24.9916	41.7581	86.2238		BI3802 (μM)	0	3.70074e-15	25.0457	41.2969	86.4421
		3.319	2.4646	1.9224	0.4235				-1.58442	24.5661	41.1612	87.038
		3.2375	2.4315	1.9286	0.4553				0.910046	25.5792	40.9715	86.0647
	2	2.0038	1.1673	0.7465	0.28			2	38.6698	64.2725	77.1519	91.4301			2	38.0709	64.1532	76.4378	93.1226
		2.0759	1.1791	0.7896	0.1843				36.4631	63.9114	75.8328	94.3591
		1.9904	1.1672	0.7734	0.2098				39.08	64.2756	76.3286	93.5787
	4	0.6079	0.7782	0.4899	0.2456			4	81.394	76.1817	85.0057	92.4829			4	79.5076	75.998	84.9485	92.5799
		0.693	0.78	0.4965	0.2409				78.7894	76.1266	84.8037	92.6268
		0.7077	0.7944	0.4889	0.2408				78.3395	75.6859	85.0363	92.6298
PANC28	raw data	ETO (μM)					PANC28	growth inhibition	ETO (μM)					PANC28	Mean growth inhibition	ETO (μM)
		0	0.1	0.2	0.4	Control mean			0	0.1	0.2	0.4				0	0.1	0.2	0.4
BI3802 (μM)	0	3.1967	2.6904	2.1416	1.2628	3.2161	BI3802 (μM)	0	0.603215	16.3459	33.41	60.7351		BI3802 (μM)	0	1.11022e-14	16.4164	33.3292	59.5794
		3.2483	2.6819	2.1473	1.3675				-1.00121	16.6102	33.2328	57.4796
		3.2033	2.6921	2.1437	1.2696				0.397998	16.293	33.3447	60.5236
	2	3.0624	0.5438	0.3954	0.2509			2	4.77908	83.0913	87.7056	92.1986			2	3.64002	83.0198	88.0632	92.1313
		3.1534	0.5417	0.3949	0.2517				1.94957	83.1566	87.7212	92.1738
		3.0813	0.5528	0.3614	0.2566				4.19141	82.8115	88.7628	92.0214
	4	2.5868	0.6049	0.5055	0.3954			4	19.5672	81.1915	84.2822	87.7056			4	21.2203	81.2786	84.0231	88.7141
		2.4693	0.5997	0.518	0.2896				23.2207	81.3532	83.8935	90.9953
		2.5448	0.6017	0.518	0.4039				20.8731	81.291	83.8935	87.4413
HCT116	raw data	ETO (μM)					HCT116	growth inhibition	ETO (μM)					HCT116	Mean growth inhibition	ETO (μM)
		0	0.1	0.2	0.4	Control mean			0	0.1	0.2	0.4				0	0.1	0.2	0.4
BI3802 (μM)	0	3.3248	2.8903	2.5273	1.7011	3.36297	BI3802 (μM)	0	1.13491	14.0551	24.8491	49.4167		BI3802 (μM)	0	-3.70074e-15	15.1632	22.5466	47.5433
		3.3792	2.7775	2.6492	1.8836				-0.482709	17.4092	21.2243	43.9899
		3.3849	2.8913	2.6377	1.7076				-0.652202	14.0253	21.5663	49.2234
	2	2.7239	1.2668	1.0569	0.6565			2	19.0031	62.3309	68.5724	80.4785			2	19.4838	62.4181	68.4644	81.3518
		2.6998	1.2789	1.0589	0.5505				19.7197	61.9711	68.5129	83.6305
		2.6995	1.2459	1.0658	0.6744				19.7286	62.9524	68.3077	79.9463
	4	1.3526	0.8892	0.8045	0.3567			4	59.7796	73.5591	76.0777	89.3933			4	59.7756	73.3202	75.9766	90.3993
		1.3458	0.8843	0.8036	0.2477				59.9818	73.7048	76.1044	92.6345
		1.3598	0.9182	0.8156	0.3642				59.5655	72.6967	75.7476	89.1703
HCT-8	raw data	ETO (μM)					HCT-8	growth inhibition	ETO (μM)					HCT-8	Mean growth inhibition	ETO (μM)
		0	0.1	0.2	0.4	Control mean			0	0.1	0.2	0.4				0	0.1	0.2	0.4
BI3802 (μM)	0	3.1163	2.3837	2.5048	2.108	3.12927	BI3802 (μM)	0	0.414368	23.8256	19.9557	32.636		BI3802 (μM)	0	0	23.653	20.1112	35.1754
		3.1557	2.3959	2.4987	1.9701				-0.844713	23.4357	20.1506	37.0428
		3.1158	2.3877	2.4963	2.0075				0.430346	23.6978	20.2273	35.8476
	2	2.6633	0.5068	0.2318	0.2491			2	14.8906	83.8045	92.5925	92.0397			2	12.6771	83.8578	92.3017	92.9494
		2.7669	0.5021	0.2465	0.1616				11.5799	83.9547	92.1228	94.8359
		2.7675	0.5065	0.2444	0.2512				11.5607	83.8141	92.1899	91.9726
	4	2.1124	0.724	0.2925	0.309			4	32.4954	76.8636	90.6528	90.1255			4	31.0169	76.8391	90.7209	91.081
		2.2166	0.7224	0.2888	0.2191				29.1655	76.9147	90.771	92.9984
		2.147	0.7279	0.2898	0.3092				31.3897	76.739	90.739	90.1191
OVCAR8	raw data	ETO (μM)					OVCAR8	growth inhibition	ETO (μM)					OVCAR8	Mean growth inhibition	ETO (μM)
		0	0.1	0.2	0.4	Control mean			0	0.1	0.2	0.4				0	0.1	0.2	0.4
BI3802 (μM)	0	3.5	2.007	1.608	0.347	3.5	BI3802 (μM)	0	0	42.6571	54.0571	90.0857		BI3802 (μM)	0	0	42.3429	53.7905	90.0381
		3.5	2.037	1.613	0.349				0	41.8	53.9143	90.0286
		3.5	2.01	1.631	0.35				0	42.5714	53.4	90
	2	2.885	0.216	0.145	0.107			2	17.5714	93.8286	95.8571	96.9429			2	17.2	93.6857	95.781	96.8286
		2.914	0.223	0.149	0.115				16.7429	93.6286	95.7429	96.7143
		2.895	0.224	0.149	0.111				17.2857	93.6	95.7429	96.8286
	4	0.518	0.319	0.137	0.074			4	85.2	90.8857	96.0857	97.8857			4	85.181	90.6476	96.0476	97.8571
		0.515	0.333	0.14	0.074				85.2857	90.4857	96	97.8857
		0.523	0.33	0.138	0.077				85.0571	90.5714	96.0571	97.8
H661	raw data	ETO (μM)					H661	growth inhibition	ETO (μM)					H661	Mean growth inhibition	ETO (μM)
		0	0.1	0.2	0.4	Control mean			0	0.1	0.2	0.4				0	0.1	0.2	0.4
BI3802 (μM)	0	2.1055	1.404	1.0475	0.4142	2.1201	BI3802 (μM)	0	0.688647	33.7767	50.592	80.4632		BI3802 (μM)	0	1.4803e-14	33.7673	50.9504	79.9522
		2.1722	1.4072	1.0327	0.4412				-2.45743	33.6258	51.29	79.1897
		2.0826	1.4014	1.0395	0.4197				1.76878	33.8993	50.9693	80.2038
	2	1.3983	0.5077	0.3133	0.2705			2	34.0456	76.053	85.2224	87.2412			2	31.0614	76.0499	85.1721	88.5115
		1.4968	0.5072	0.31	0.1943				29.3996	76.0766	85.378	90.8353
		1.4896	0.5084	0.3198	0.2659				29.7392	76.02	84.9158	87.4581
	4	0.2141	0.194	0.178	0.3514			4	89.9014	90.8495	91.6042	83.4253			4	87.0211	90.9218	91.7048	87.6657
		0.305	0.1913	0.1759	0.2155				85.6139	90.9768	91.7032	89.8354
		0.3064	0.1921	0.1737	0.2176				85.5479	90.9391	91.807	89.7363

## Sheet: 6F
Figure 6F Source Data
Tail moment	HCT116				Capan-2
exp	Control	ETO	BI3802	ETO+BI	Control	ETO	BI3802	ETO+BI
1	5.37373	24.227	25.553	102.657	3.47258	32.5755	22.6763	51.6667
2	4.90135	23.1889	24.7297	98.3569	3.16713	32.3796	20.2494	48.2989
3	4.71482	17.8991	23.0519	90.0099	3.14071	30.7287	15.3542	44.7807
4	4.51178	17.8396	22.7275	71.3858	2.53611	30.3937	15.0747	44.733
5	4.13857	17.7981	22.1926	71.1385	2.50955	28.6437	14.8977	44.2507
6	3.79578	16.2948	21.4383	68.0041	2.33468	28.2484	14.2562	42.364
7	3.66393	15.8128	20.9091	67.6886	2.13673	27.3194	14.0636	41.8873
8	3.54703	15.0232	20.0828	65.7232	1.94551	26.4988	13.7789	40.5251
9	3.48714	14.7545	19.9195	60.6934	1.85939	26.4835	13.5434	40.4802
10	2.97807	14.4298	19.8105	58.0107	1.84013	26.2058	12.5197	40.0767
11	2.94152	13.8583	19.4046	48.9525	1.82512	25.341	12.1564	39.6055
12	2.91632	11.9786	18.6435	48.9378	1.7318	25.1294	11.9298	38.4718
13	2.84318	11.6919	17.6211	46.3759	1.51658	25.1224	11.613	37.666
14	2.83627	10.8626	17.2253	44.3402	1.38485	25.0671	11.2259	37.4398
15	2.66782	10.799	17.1187	41.8873	1.20531	24.6994	11.0159	36.5345
16	2.66646	10.7095	16.4906	41.6156	1.14315	24.6367	10.8124	36.3268
17	2.63767	10.6734	16.3396	40.5251	1.14243	22.9672	10.1468	36.1518
18	2.41712	10.1998	16.2645	40.4802	1.09233	22.2071	10.0925	36.0794
19	2.35563	10.0831	16.2448	38.3772	1.06384	22.1739	9.83091	35.4133
20	2.31958	9.92138	15.7915	35.4384	0.969042	21.0653	9.25569	34.7884
21	2.28358	9.46548	15.2723	34.3761	0.916128	20.3455	9.09464	34.6806
22	2.26089	9.13854	14.9968	34.3627	0.888178	20.3351	8.88829	34.193
23	2.25404	8.77132	14.9884	29.3542	0.840716	20.1783	8.86469	34.1468
24	2.22897	8.59522	14.4937	28.4049	0.775936	19.8732	8.85353	32.9854
25	2.13678	8.2165	13.7512	27.9693	0.75957	19.5598	8.76083	32.2813
26	2.0121	8.08144	13.2075	27.8482	0.740339	19.1769	8.36586	32.2744
27	1.97677	8.0312	12.9725	27.2635	0.725356	18.5963	7.5701	31.5145
28	1.93424	7.88371	12.8086	27.1584	0.723269	17.13	7.40694	31.1844
29	1.89991	7.10809	12.7742	26.9596	0.668821	16.0292	7.18249	30.4082
30	1.72339	7.04941	11.713	26.9397	0.665293	15.1689	7.11797	30.3839
31	1.69292	6.6262	11.4751	26.8196	0.620264	14.6728	6.89848	30.2816
32	1.54675	6.58507	11.1257	23.9907	0.603754	13.6277	6.80797	30.2086
33	1.46864	6.43912	10.8002	22.687	0.493158	13.4841	6.79645	29.6644
34	1.3549	6.36639	10.7426	22.6589	0.474828	13.3969	6.34055	28.882
35	1.23543	6.24869	10.7004	22.3971	0.380064	12.3635	6.19812	28.8533
36	1.19459	6.16462	10.3702	22.2133	0.312125	12.3505	4.77321	26.6743
37	1.19273	6.10625	10.1289	22.0975	0.304462	11.3523	4.51178	26.0088
38	1.18311	6.1031	9.45838	19.9636	0.279236	11.2673	3.72368	25.9525
39	0.880308	5.97947	9.36271	16.5654	0.268987	10.3984	3.71215	24.2293
40	0.864206	5.89386	9.36244	15.0763	0.255965	9.91669	3.42543	22.1065
41	0.631106	5.75823	8.4731	14.4987	0.237991	9.68271	3.12183	21.8432
42	0.565245	5.6395	8.35237	14.3882	0.237442	8.96469	3.03638	19.8452
43	0.547109	5.11757	6.59358	14.119	0.192479	7.84674	2.75627	18.4171
44	0.348189	5.06208	6.5554	13.9074	0.160998	7.83602	2.25317	18.2279
45	0.29669	4.80833	6.28909	13.8504	0.0590559	6.48368	2.19415	17.2736
46	0.186792	3.94873	3	12.5556	4.29654	5.84234	26.0715	95.985
47	0.12459	3.77557	6.65431	11.1789	4.03097	5.82415	25.8549	83.6006
48	0.100593	3.68323	3.58403	10.9378	0.000469463	4.84119	2.1625	16.2248
49	0.033319	3.60092	5.84234	9.55034	3.69147	4.56757	24.0315	77.7358
50	0.0251516	3.17399	5.82415	6.4283	5.97232	3.88755	32.978	59.0857
Mean	2.07794	9.54934	13.8646	36.1424	1.37186	18.0577	10.4849	36.6539
STDEV	1.35874	4.96654	5.69956	23.431	1.28617	8.25322	6.78447	15.4531

## Sheet: S6A
Figure S6A Source Data
H838 Raw data	ADR dose (μM)	0	0.0032805	0.010935	0.03645	0.1215	0.405	1.35	4.5	15	50
Control	Exp #1	0.221	0.211	0.205	0.214	0.197	0.158	0.113	0.072	0.066	0.068
	Exp #2	0.213	0.199	0.211	0.232	0.218	0.156	0.123	0.075	0.071	0.082
BI3802 10 μM	Exp #1	0.181	0.162	0.184	0.18	0.158	0.107	0.089	0.072	0.067	0.074
	Exp #2	0.191	0.193	0.185	0.183	0.153	0.115	0.09	0.069	0.062	0.067
	Mean of Control	0.217
Relative cell viability	ADR dose (μM)	0	0.0032805	0.010935	0.03645	0.1215	0.405	1.35	4.5	15	50
Control	Exp #1	101.843	97.235	94.47	98.6175	90.7834	72.8111	52.0737	33.1797	30.4147	31.3364
	Exp #2	98.1567	91.7051	97.235	106.912	100.461	71.8894	56.682	34.5622	32.7189	37.788
BI3802 10 μM	Exp #1	83.4101	74.6544	84.7926	82.9493	72.8111	49.3088	41.0138	33.1797	30.8756	34.1014
	Exp #2	88.0184	88.9401	85.2535	84.3318	70.5069	52.9954	41.4747	31.7972	28.5714	30.8756
Capan-2 Raw data	ADR dose (μM)	0	0.0032805	0.010935	0.03645	0.1215	0.405	1.35	4.5	15	50
Control	Exp #1	0.247	0.281	0.273	0.254	0.212	0.169	0.118	0.056	0.061	0.079
	Exp #2	0.283	0.286	0.304	0.25	0.207	0.171	0.114	0.077	0.062	0.068
BI3802 10 μM	Exp #1	0.251	0.239	0.212	0.196	0.161	0.114	0.068	0.067	0.054	0.053
	Exp #2	0.273	0.253	0.26	0.194	0.158	0.113	0.082	0.071	0.052	0.065
	Mean of Control	0.265
Relative cell viability	ADR dose (μM)	0	0.0032805	0.010935	0.03645	0.1215	0.405	1.35	4.5	15	50
Control	Exp #1	93.2075	106.038	103.019	95.8491	80	63.7736	44.5283	21.1321	23.0189	29.8113
	Exp #2	106.792	107.925	114.717	94.3396	78.1132	64.5283	43.0189	29.0566	23.3962	25.6604
BI3802 10 μM	Exp #1	94.717	90.1887	80	73.9623	60.7547	43.0189	25.6604	25.283	20.3774	20
	Exp #2	103.019	95.4717	98.1132	73.2075	59.6226	42.6415	30.9434	26.7925	19.6226	24.5283
AsPC-1 Raw data	ADR dose (μM)	0	0.0032805	0.010935	0.03645	0.1215	0.405	1.35	4.5	15	50
Control	Exp #1	0.478181	0.501117	0.474405	0.444487	0.47761	0.323749	0.219038	0.152793	0.164546	0.149587
	Exp #2	0.582818	0.535308	0.41457	0.507528	0.380379	0.322681	0.219038	0.18271	0.188052	0.136765
BI3802 10 μM	Exp #1	0.438056	0.42755	0.470305	0.33754	0.292534	0.299285	0.223901	0.16652	0.159769	0.0967614
	Exp #2	0.442059	0.442177	0.365668	0.320663	0.257655	0.223901	0.16877	0.144017	0.148518	0.0877603
	Mean of Control	0.5305
Relative cell viability	ADR dose (μM)	0	0.0032805	0.010935	0.03645	0.1215	0.405	1.35	4.5	15	50
Control	Exp #1	90.1379	94.4612	89.426	83.7865	90.0302	61.0272	41.289	28.8016	31.0171	28.1974
	Exp #2	109.862	100.906	78.147	95.6697	71.7019	60.8258	41.289	34.4411	35.4481	25.7805
BI3802 10 μM	Exp #1	82.5743	80.5939	88.6533	63.6267	55.1432	56.4157	42.2057	31.3892	30.1167	18.2397
	Exp #2	83.3287	83.351	68.929	60.4454	48.5684	42.2057	31.8134	27.1474	27.9958	16.543

## Sheet: S6B
Figure S6B Source Data
H838 Raw data							ADR+BI3802
ADR dose (μM)	10	5	2.5	1.25	0.625	0.3125	10:30	5:15	2.5:7.5	Control		Mean of Control	Relative cell growth inhibition										Mean of relative cell growth inhibition
0.0531	0.0532	0.0553	0.0551	0.0629	0.0525	0.0535	0.0538	0.0539	0.0541	0.0544	0.0535																						ADR dose	BI3802 Dose	Fa	CI
0.0449	0.095	0.077	0.0995	0.1055	0.1827	0.2306	0.0889	0.0913	0.0926	0.2609	0.0438	0.2654	0.64205	0.709872	0.625094	0.602487	0.311605	0.131123	0.665034	0.655991	0.651093		0.684125	0.6737	0.592941	0.558654	0.290756	0.111027	0.660261	0.64318	0.627104		0.3125	0.9375	0.358201	0.353
0.0445	0.0785	0.1048	0.1073	0.1207	0.189	0.2559	0.092	0.0855	0.0991	0.2062	0.0456		0.70422	0.605124	0.595705	0.545215	0.287867	0.035795	0.653353	0.677845	0.626601												0.625	1.875	0.461191	0.414
0.0478	0.078	0.078	0.1173	0.1252	0.193	0.2213	0.0896	0.1073	0.1052	0.2698	0.047		0.706104	0.706104	0.558026	0.528259	0.272796	0.166164	0.662396	0.595705	0.603617												1.25	3.75	0.530018	0.588
0.0451	0.1452	0.1899	0.2134	0.2343	0.254	0.2425	0.1218	0.1363	0.1548	0.2698	0.0464		0.452901	0.284476	0.195931	0.117182	0.042954	0.0862849	0.54107	0.486436	0.416729		0.421	0.295654	0.195805	0.135393	0.0555137	0.0379302	0.530018	0.461191	0.358201		2.5	7.5	0.627104	0.714
0.0447	0.1554	0.1963	0.1935	0.2108	0.2456	0.2567	0.1128	0.1547	0.1953	0.2764	0.0532		0.414469	0.260362	0.270912	0.205727	0.0746044	0.0327807	0.574981	0.417106	0.26413												5	15	0.64318	1.31
0.0432	0.1604	0.1746	0.2334	0.2433	0.2524	0.2668	0.1396	0.138	0.1609	0.25	0.0404		0.395629	0.342125	0.120573	0.0832705	0.0489827	-0.00527506	0.474002	0.48003	0.393745												10	30	0.660261	2.386
0.0408	0.0434	0.0986	0.047	0.0446	0.045	0.046	0.0459	0.0441	0.0441	0.046	0.045
BI3802 Dose (μM)	30	15	7.5	3.75	1.875	0.9375	1.25:3.75	0.625:1.875	0.3125:0.9375				Relative cell vibility
													35.795	29.0128	37.4906	39.7513	68.8395	86.8877	33.4966	34.4009	34.8907
													29.578	39.4876	40.4295	45.4785	71.2133	96.4205	34.6647	32.2155	37.3399
													29.3896	29.3896	44.1974	47.1741	72.7204	83.3836	33.7604	40.4295	39.6383
													54.7099	71.5524	80.4069	88.2818	95.7046	91.3715	45.893	51.3564	58.3271
													58.5531	73.9638	72.9088	79.4273	92.5396	96.7219	42.5019	58.2894	73.587
													60.4371	65.7875	87.9427	91.6729	95.1017	100.528	52.5998	51.997	60.6255
Capan-2 Raw data							ADR+BI3802
ADR dose (μM)	1.5	0.75	0.375	0.1875	0.09375	0.046875	1.5:30	0.75:15	0.375:7.5	Control		Mean of Control	Relative cell growth inhibition										Mean of relative cell growth inhibition
0.0432	0.0549	0.0559	0.0541	0.0455	0.0332	0.0493	0.0566	0.0561	0.0401	0.0119	0.0549																						ADR dose	BI3802 Dose	Fa	CI
0.0462	0.2656	0.3594	0.4471	0.5269	0.6186	0.6578	0.1605	0.2244	0.4582	0.7765	0.0463	0.803533	0.66946	0.552725	0.443583	0.344271	0.23015	0.181366	0.800257	0.720733	0.429769		0.656724	0.580312	0.439268	0.33083	0.238779	0.184975	0.797519	0.725836	0.425413		0.046875	0.9375	0.320314	0.329
0.0449	0.2766	0.3214	0.4524	0.5378	0.6076	0.6218	0.1676	0.2169	0.444	0.839	0.0472		0.65577	0.600017	0.436987	0.330706	0.24384	0.226168	0.791421	0.730067	0.44744												0.09375	1.875	0.430204	0.297
0.0451	0.2853	0.3309	0.4522	0.5484	0.6088	0.6851	0.16	0.2196	0.4829	0.7514	0.0452		0.644943	0.588194	0.437236	0.317514	0.242346	0.147391	0.800879	0.726707	0.399029												0.1875	3.75	0.511781	0.347
0.0558	0.532	0.5605	0.5559	0.579	0.6525	0.6652	0.3852	0.4323	0.5455	0.7721	0.0493		0.337924	0.302456	0.308181	0.279433	0.187962	0.172156	0.520617	0.462001	0.321123		0.327408	0.25896	0.266054	0.267299	0.143097	0.13171	0.511781	0.430204	0.320314		0.375	7.5	0.425413	1.226
0.0455	0.5489	0.6304	0.6236	0.5985	0.7246	0.7302	0.3994	0.4834	0.5468	0.7804	0.046		0.316892	0.215465	0.223928	0.255165	0.0982328	0.0912636	0.502945	0.398407	0.319506												0.75	15	0.725836	0.318
0.0263	0.54045	0.59545	0.58975	0.58875	0.68855	0.6977	0.3923	0.45785	0.54615	0.8581	0.0403		0.327408	0.25896	0.266054	0.267299	0.143097	0.13171	0.511781	0.430204	0.320314												1.5	30	0.797519	0.341
0.0318	0.0341	0.0457	0.049	0.0424	0.0486	0.0471	0.0467	0.034	0.0461	0.0238	0.0451
BI3802 Dose (μM)	30	15	7.5	3.75	1.875	0.9375	0.1875:3.75	0.09375:1.875	0.046875:0.9375				Relative cell vibility
													33.054	44.7275	55.6417	65.5729	76.985	81.8634	19.9743	27.9267	57.0231
													34.423	39.9983	56.3013	66.9294	75.616	77.3832	20.8579	26.9933	55.256
													35.5057	41.1806	56.2764	68.2486	75.7654	85.2609	19.9121	27.3293	60.0971
													66.2076	69.7544	69.1819	72.0567	81.2038	82.7844	47.9383	53.7999	67.8877
													68.3108	78.4535	77.6072	74.4835	90.1767	90.8736	49.7055	60.1593	68.0494
													67.2592	74.104	73.3946	73.2701	85.6903	86.829	48.8219	56.9796	67.9686
AsPC-1 Raw data							ADR+BI3802
ADR dose (μM)	1.5	0.75	0.375	0.1875	0.09375	0.046875	1.5:30	0.75:15	0.375:7.5	Control		Mean of Control	Relative cell growth inhibition										Mean of relative cell growth inhibition
0.0536	0.0535	0.051	0.0534	0.0573	0.0581	0.051	0.0393	0.0564	0.0552	0.0544	0.056																						ADR dose	BI3802 Dose	Fa	CI
0.0401	0.1634	0.2244	0.2509	0.3346	0.3705	0.43535	0.1644	0.1921	0.1548	0.1361	0.0523	0.4277	0.617957	0.475333	0.413374	0.217676	0.133739	-0.0178864	0.615618	0.550853	0.638064		0.61593	0.474008	0.313615	0.121191	0.108253	-0.0178864	0.579456	0.551009	0.502299		0.046875	0.9375	0.17033	0.467
0.0458	0.1578	0.2259	0.3175	0.403	0.3636	0.449	0.1997	0.1801	0.2523	0.4277	0.0465		0.63105	0.471826	0.257657	0.0577508	0.149871	-0.0498013	0.533084	0.57891	0.410101												0.09375	1.875	0.195464	0.793
0.0491	0.1716	0.2246	0.3123	0.39	0.4101	0.4217	0.1755	0.2039	0.2315	0.3915	0.0462		0.598784	0.474866	0.269815	0.0881459	0.0411503	0.0140285	0.589666	0.523264	0.458733												0.1875	3.75	0.415361	0.563
0.0555	0.1749	0.236	0.2251	0.3737	0.3996	0.3983	0.2661	0.3212	0.3361	0.4277	0.0484		0.591069	0.448211	0.473697	0.126257	0.0657003	0.0687398	0.377835	0.249006	0.214169		0.571312	0.402969	0.336801	0.119827	0.0287585	0.120412	0.415361	0.195464	0.17033		0.375	7.5	0.502299	0.807
0.0502	0.1918	0.2747	0.3422	0.3792	0.4312	0.3541	0.234	0.367	0.3736	0.4277	0.0522		0.551555	0.357727	0.199906	0.113397	-0.00818331	0.172083	0.452888	0.141922	0.126491												0.75	15	0.551009	1.342
0.0467	0.18335	0.25535	0.28365	0.37645	0.4154	0.3762	0.25005	0.3441	0.35485	0.4277	0.102		0.571312	0.402969	0.336801	0.119827	0.0287585	0.120412	0.415361	0.195464	0.17033												1.5	30	0.579456	2.407
0.0496	0.0437	0.0349	0.048	0.0471	0.0482	0.0462	0.0494	0.0448	0.0542	0.0838	0.0472
BI3802 Dose (μM)	30	15	7.5	3.75	1.875	0.9375	0.1875:3.75	0.09375:1.875	0.046875:0.9375				Relative cell vibility
													38.2043	52.4667	58.6626	78.2324	86.6261	101.789	38.4382	44.9147	36.1936
													36.895	52.8174	74.2343	94.2249	85.0129	104.98	46.6916	42.109	58.9899
													40.1216	52.5134	73.0185	91.1854	95.885	98.5971	41.0334	47.6736	54.1267
													40.8931	55.1789	52.6303	87.3743	93.43	93.126	62.2165	75.0994	78.5831
													44.8445	64.2273	80.0094	88.6603	100.818	82.7917	54.7112	85.8078	87.3509
													42.8688	59.7031	66.3199	88.0173	97.1242	87.9588	58.4639	80.4536	82.967

## Sheet: S6C
Figure S6C Source Data
H838	raw data	ADR (nM)				H838	growth inhibition	ADR (nM)				H838	Mean growth inhibition	ADR (nM)
		0	5	10	Control mean			0	5	10				0	5	10
BI3802 (μM)	0	3.5	1.19	0.699	3.5	BI3802 (μM)	0	0	66	80.0286		BI3802 (μM)	0	0	66.6381	79.9524
		3.5	1.151	0.696				0	67.1143	80.1143
		3.5	1.162	0.71				0	66.8	79.7143
	2	3.34	0.917	0.555			2	4.57143	73.8	84.1429			2	5.61905	73.5619	84.2476
		3.32	0.938	0.551				5.14286	73.2	84.2571
		3.25	0.921	0.548				7.14286	73.6857	84.3429
	4	3.15	0.68	0.259			4	10	80.5714	92.6			4	9.42857	81.3524	92.7619
		3.16	0.65	0.251				9.71429	81.4286	92.8286
		3.2	0.628	0.25				8.57143	82.0571	92.8571
OVCAR8	raw data	ADR (nM)				OVCAR8	growth inhibition	ADR (nM)				OVCAR8	Mean growth inhibition	ADR (nM)
		0	5	10	Control mean			0	5	10				0	5	10
BI3802 (μM)	0	2.21	1.98	0.18	2.18	BI3802 (μM)	0	-1.37615	9.17431	91.7431		BI3802 (μM)	0	-1.11022e-14	8.8685	92.2018
		2.15	1.97	0.16				1.37615	9.63303	92.6606
		2.18	2.01	0.17				-2.22045e-14	7.79817	92.2018
	2	0.689	0.56	0.16			2	68.3945	74.3119	92.6606			2	68.7615	73.3945	92.6758
		0.679	0.58	0.165				68.8532	73.3945	92.4312
		0.675	0.6	0.154				69.0367	72.4771	92.9358
	4	0.321	0.21	0.134			4	85.2752	90.367	93.8532			4	83.0581	90.1529	93.5321
		0.398	0.221	0.145				81.7431	89.8624	93.3486
		0.389	0.213	0.144				82.156	90.2294	93.3945
