# Supplementary material for: The oncoprotein BCL6 enables solid tumor cells to evade genotoxic stress
Source: eLife. 2022 May 3;11:e69255. doi: 10.7554/eLife.69255 (PMC9064299; doi:10.7554/eLife.69255)
Supplement: Figure 7—source data 1. [file elife-69255-fig7-data1.xls]

## Sheet: 7A, 7D
Figure 7 Source Data 1. Biochemistry testing of plasma from the HCT116 xenograft mice and the LACPDX mice.
HCT116 xenograft mice
Item	Group	Value	P-value (Treatment vs. Vehicle)
AST/ALT	Vehicle	4.65 ± 0.82
	ETO	6.46 ± 1.11	0.0190426
	ETO + FX1	6.1 ± 0.64	0.0159945
BUN (mmol/L)	Vehicle	8.04 ± 0.64
	ETO	8.32 ± 1.2	0.658394
	ETO + FX1	6.42 ± 0.75	0.00649523
CR (μmol/L)	Vehicle	76.2 ± 4.76
	ETO	74.8 ± 5.89	0.690316
	ETO + FX1	68.4 ± 3.71	0.0202952
LACPDX mice
Item	Group	Value	P-value (Treatment vs. Vehicle)
AST/ALT	Vehicle	3.15 ± 1.8
	ETO	2.96 ± 2.26	0.891558
	FX1	3.43 ± 2.35	0.755229
	ETO + FX1	3.94 ± 2.32	0.580195
BUN (mmol/L)	Vehicle	7.06 ± 1.88
	ETO	10 ± 2.15	0.0106055
	FX1	13.38 ± 2.12	0.000101278
	ETO + FX1	14.23 ± 2.23	0.0210037
CR (μmol/L)	Vehicle	15.4 ± 2.88
	ETO	21.2 ± 2.07	0.0281284
	FX1	23.8 ± 5.09	0.00444009
	ETO + FX1	31.4 ± 5.57	0.0131262
