# Supplementary material for: The oncoprotein BCL6 enables solid tumor cells to evade genotoxic stress
Source: eLife. 2022 May 3;11:e69255. doi: 10.7554/eLife.69255 (PMC9064299; doi:10.7554/eLife.69255)
Supplement: Supplementary file 1. [file elife-69255-supp1.xls]

## Sheet: Supplementary file 1
Supplementary file 1. Cell lines and cell culture medium.
Histology	Cell lines	Medium
Lung, adenocarcinoma	PC9	RMPI1640
	H1975	RMPI1640
	H838	RMPI1640
	H522	RMPI1640
	H661	RMPI1640
	HCC827	RMPI1640
Colon, adenocarcinoma	HCT-8	RMPI1640
	DLD-1	RMPI1640
	LoVo	DMEM
	HT-29	DMEM
	HCT116	DMEM
Pancreatic, adenocarcinoma	Capan-2	RMPI1640
	PANC28	DMEM
	AsPC-1	RMPI1640
	BxPC-3	DMEM
	PANC-1	DMEM
	MIA PaCa-2	DMEM
Ovrian	HEYA8	DMEM
	HEY	DMEM
	ES-2	DMEM
	OVCA420	RMPI1640
	OVCAR8	RMPI1640
