# Supplementary material for: The oncoprotein BCL6 enables solid tumor cells to evade genotoxic stress
Source: eLife. 2022 May 3;11:e69255. doi: 10.7554/eLife.69255 (PMC9064299; doi:10.7554/eLife.69255)
Supplement: Supplementary file 2. [file elife-69255-supp2.xls]

## Sheet: Supplementary file 2
Supplementary file 2. siRNA and shRNA sequences.
sequence	Sequence (5'->3')
siBCL6 #1	CCTTGTGACAAGGCCAGCA
siBCL6 #2	CCAUUGUGAGAAGUGUAACCUGCAU
siSTAT1 #1	CUCAUUCCGUGGACGAGGUdTdT
siSTAT1 #2	CCUGAUUAAUGAUGAACUAdTdT
siIFNAR1 #1	CCUCCAGUCUUUAACAUUATT
siIFNAR1 #2	GGAUGGAUAAUUGGAUAAATT
shBCL6 #1F	CCGGCCACAGTGACAAACCCTACAACTCGAGTTGTAGGGTTTGTCACTGTGGTTTTTG
shBCL6 #1R	AATTCAAAAACCACAGTGACAAACCCTACAACTCGAGTTGTAGGGTTTGTCACTGTGG
shBCL6 #2F	CCGGTGTGCCACAGCAATATCTATTCTCGAGAATAGATATTGCTGTGGCACATTTTTG
shBCL6 #2R	AATTCAAAAATGTGCCACAGCAATATCTATTCTCGAGAATAGATATTGCTGTGGCACA
