# Supplementary material for: The oncoprotein BCL6 enables solid tumor cells to evade genotoxic stress
Source: eLife. 2022 May 3;11:e69255. doi: 10.7554/eLife.69255 (PMC9064299; doi:10.7554/eLife.69255)
Supplement: Supplementary file 3. [file elife-69255-supp3.xls]

## Sheet: Supplementary file 3
Supplementary file 3. Primers for PCR assays.
Application	Classification	Primer	Sequence (5'->3')
qRT-PCR	BCL6 target genes	BANK1 #F	AGAGGAAACTACACCTTACATAGCTC
		BANK1 #R	GATGAGTTCTTCCTGACCATCAG
		NOTCH2 #F	TTGTTGTTGAAAAATGGGGC
		NOTCH2 #R	CTCGATTGGCAAAATGGTCT
		EIF4E #F	GGACTTCTGGGCGCTATACAG
		EIF4E #R	CTTGAAGAGGGCGTAGTCACA
		CXCR4 #F	AGGCCCTAGCTTTCTTCCAC
		CXCR4 #R	CTGCTCACAGAGGTGAGTGC
		CDKN2C #F	GCCTGTAGGGGTGAAAGGAG
		CDKN2C #R	GCCATTCTTTAGGGTCCCTTGT
	BCL6	BCL6 #F	GCCGGCTCAATAACATCGTT
		BCL6 #R	CTCATTGCAGAAGAAGGCCC
	GAPDH	GAPDH #F	AATCCCATCACCATCTTCCA
		GAPDH #R	TGGACTCCACGACGTACTCA
	IFN-α and IFN-γ pathway-related genes	IFNA1 #F	GTGAGGAAATACTTCCAAAGAATCAC
		IFNA1 #R	TCTCATGATTTCTGCTCTGACAA
		IFNG #F	GGGTAACTGACTTGAATGTCC
		IFNG #R	TTTTCGCTTCCCTGTTTTAG
		IRF7 #F	GCGTACCCTGGAAGCATTTC
		IRF7 #R	GCACAGCGGAAGTTGGTCT
		IL6 #F	ACTCACCTCTTCAGAACGAATTG
		IL6 #R	CCATCTTTGGAAGGTTCAGGTTG
		SMAD9 #F	TGAGTGCATTGGAAATCCTCTG
		SMAD9 #R	GCCTCCTCGATAAAAGTGTTCTT
		STAT1 #F	TCACAGTGGTTCGAGCTTCAG
		STAT1 #R	GCAAACGAGACATCATAGGCA
		IRF1 #F	GTAGGTACCCCTTCCCATCC
		IRF1 #R	CCTCCACCTCTGAAGCTACAAC
		CASP1 #F	GAAAAGCCATGGCCGACAAG
		CASP1 #R	ACAGAGCCCATTGTGGGATG
		IFI44L #F	AGCCGTCAGGGATGTACTATAAC
		IFI44L #R	AGGGAATCATTTGGCTCTGTAGA
	PTEN	PTEN #F	AGCGTGCAGATAATGACAAGG
		PTEN #R	TGGATCAGAGTCAGTGGTGTC
ChIP-qPCR	BCL6 promoter regions	ChIP1 #F	TGGTTCAAACCTCTCGCTCC
		ChIP1 #R	GGACTTGGTGTCAGCTCTCC
		ChIP2 #F	CCGATGCCGATCCTGTGATT
		ChIP2 #R	GACATAAGAGGGGGAGTGCG
		ChIP3 #F	ATCTGTGATACTGGCACGGC
		ChIP3 #R	ATGTAACAATCCCAGCCCCC
		ChIP4 #F	TCCCTTCCACAAAATCGGGG
		ChIP4 #R	ATGTTGTTGGCAATGCACCC
		ChIP5 #F	AAATGTGGCACTCTGGCACT
		ChIP5 #R	TCCCGCTGGATGCAAAATGA
		ChIP6 #F	AGCAGCAATGATCAGGGACC
		ChIP6 #R	AGTGCCAGAGTGCCACATTT
		ChIP7 #F	AAATGACAGAGGGCCAGCAA
		ChIP7 #R	GCCTCATGGACTGGGCATAA
		ChIP8 #F	CAGGCACAACACGCAAATCA
		ChIP8 #R	TGCTGCCTGCTTTTAGCCTT
